1 ***Drosophila* models of pathogenic copy-number variant genes show global and**  
2 **non-neuronal defects during development**

3

4 Tanzeen Yusuff<sup>1,4</sup>, Matthew Jensen<sup>1,4</sup>, Sneha Yennawar<sup>1,4</sup>, Lucilla Pizzo<sup>1</sup>, Siddharth  
5 Karthikeyan<sup>1</sup>, Dagny J. Gould<sup>1</sup>, Avik Sarker<sup>1</sup>, Yurika Matsui<sup>1,2</sup>, Janani Iyer<sup>1</sup>, Zhi-Chun Lai<sup>1,2</sup>,  
6 and Santhosh Girirajan<sup>1,3\*</sup>

7

8 1. Department of Biochemistry and Molecular Biology, Pennsylvania State University,  
9 University Park, PA 16802

10 2. Department of Biology, Pennsylvania State University, University Park, PA 16802

11 3. Department of Anthropology, Pennsylvania State University, University Park, PA 16802

12

13 <sup>4</sup> contributed equally to work

14

15

16 \*Correspondence:

17 Santhosh Girirajan, MBBS, PhD

18 205A Life Sciences Building

19 Pennsylvania State University

20 University Park, PA 16802

21 E-mail: [sxg47@psu.edu](mailto:sxg47@psu.edu)

22 Phone: 814-865-0674

23

24 **ABSTRACT**

25 While rare pathogenic CNVs are associated with both neuronal and non-neuronal phenotypes,  
26 functional studies evaluating these regions have focused on the molecular basis of neuronal  
27 defects. We report a systematic functional analysis of non-neuronal phenotypes for 59 homologs  
28 of genes within ten CNVs and 20 neurodevelopmental genes in *Drosophila*. Using wing-specific  
29 knockdown of 136 RNA interference lines, we identify phenotypes in 72/79 homologs including  
30 six lines with lethality and 21 lines with severe phenotypes. We find no correlation between  
31 severity of these phenotypes and neuronal defects due to eye-specific knockdown. We observe  
32 disruptions in cell proliferation and apoptosis for 23/27 homologs, and altered Wnt, Hedgehog  
33 and Notch signaling for 9/14 homologs, including *AATF/Aatf*, *PPP4C/Pp4-19C*, and  
34 *KIF11/Klp61F*, validated with differences in human tissue-specific expression and network  
35 connectivity. Our findings suggest that multiple genes within each CNV differentially affect both  
36 global and tissue-specific developmental processes, contributing to non-neuronal phenotypes of  
37 CNV disorders.

38

39

## 40 INTRODUCTION

41 Rare copy-number variants (CNVs), or deletions and duplications in the genome, are associated  
42 with neurodevelopmental disorders such as autism, intellectual disability (ID), and  
43 schizophrenia<sup>1,2</sup>. While dosage alteration of CNV regions contribute predominantly to defects in  
44 nervous system development, several CNV disorders also lead to early developmental features  
45 involving other organ systems<sup>3,4</sup>, including cardiac defects<sup>5,6</sup>, kidney malformations<sup>7</sup>,  
46 craniofacial features<sup>3</sup>, and skeletal abnormalities<sup>8</sup>. In fact, an overall survey of ten rare disease-  
47 associated CNVs among individuals within the DECIPHER database<sup>9</sup> showed a wide range of  
48 non-neuronal phenotypes across multiple organ systems for each CNV disorder (**Fig. 1**). For  
49 example, the 1q21.1 deletion causes variable expression of multiple neuronal and non-neuronal  
50 phenotypes, including developmental delay, autism, and schizophrenia as well as craniofacial  
51 features, cataracts, cardiac defects, and skeletal abnormalities<sup>10-12</sup>. Additionally, while the  
52 7q11.23 deletion associated with Williams-Beuren syndrome (WBS) causes neuropsychiatric and  
53 behavioral features, other non-neuronal phenotypes, including supravalvular aortic stenosis,  
54 auditory defects, hypertension, diabetes mellitus, and musculoskeletal and connective tissue  
55 anomalies, are also observed among the deletion carriers<sup>13</sup>. In fact, individual genes within the  
56 WBS region are associated with specific features of the deletion, such as *ELN* and supravalvular  
57 aortic stenosis<sup>14</sup>, *STX1A* and impaired glucose tolerance<sup>15</sup>, *LIMK1* and impaired visuospatial  
58 abilities<sup>16</sup>, and *GTF2IRD1* and craniofacial abnormalities<sup>17</sup>. Furthermore, *TBX1* was identified to  
59 cause the pharyngeal arch cardiac defects associated with the 22q11.2 deletion (DiGeorge  
60 syndrome)<sup>18</sup>, while *HNF1B* within the 17q12 deletion region was identified as the causative gene  
61 for kidney defects associated with the deletion<sup>19,20</sup>. However, candidate genes for a majority of  
62 non-neuronal phenotypes have not been identified for several rare CNV disorders, in particular

63 for CNVs associated with variably-expressive phenotypes such as the 1q21.1 deletion and the  
64 16p11.2 deletion<sup>21,22</sup>. Additionally, affected individuals who carry disruptive mutations in  
65 neurodevelopmental genes from recent sequencing studies have also been documented to  
66 manifest non-neuronal phenotypes. For example, individuals with loss-of-function mutations in  
67 the autism-associated gene *CHD8* present with gastrointestinal problems, tall stature, and  
68 craniofacial features in addition to neuropsychiatric features<sup>23</sup>, while mutations in the  
69 microcephaly-associated gene *KIF11* also lead to congenital lymphedema and retinopathy<sup>24</sup>.

70         Despite the importance of identifying genes within CNVs that contribute towards non-  
71 neuronal phenotypes, functional studies of CNV genes have primarily focused on detailed  
72 assessments of neuronal phenotypes in model systems. For example, mouse models generated for  
73 the 16p11.2 deletion exhibited post-natal lethality, reduced brain size and neural progenitor cell  
74 count, motor and habituation defects, synaptic defects, and behavioral defects<sup>25-27</sup>. Similarly,  
75 mouse models for the 3q29 deletion showed decreased weight and brain size, increased  
76 locomotor activity and startle response, and decreased spatial learning and memory<sup>28,29</sup>.  
77 However, fewer studies have focused on detailed evaluation of non-neuronal phenotypes in  
78 functional models of CNV disorders. For example, Arbogast and colleagues evaluated obesity  
79 and metabolic changes in 16p11.2 deletion mice, which showed reduced weight and impaired  
80 adipogenesis<sup>30</sup>. While Haller and colleagues showed that mice with knockdown of *MAZ*, a gene  
81 within the 16p11.2 deletion region, contribute to the genitourinary defects observed in  
82 individuals with the deletion<sup>31</sup>, mouse studies on other homologs of 16p11.2 genes, including  
83 *TAOK2*, *KCTD13*, and *MAPK3*, have only focused on assessing neuronal defects<sup>32-36</sup>.  
84 Furthermore, Dickinson and colleagues reported a high-throughput analysis of essential genes in  
85 mice and identified both neuronal and non-neuronal phenotypes for individual gene knockouts,

86 including more than 400 genes that lead to lethality<sup>37</sup>. While these efforts aided in implicating  
87 novel genes with human disease, our understanding of how genes associated with  
88 neurodevelopmental disorders contribute towards non-neuronal phenotypes is still limited.  
89 Therefore, a large-scale analysis of non-neuronal phenotypes is necessary to identify specific  
90 candidate genes within CNV regions and associated biological mechanisms that contribute  
91 towards these phenotypes.

92 *Drosophila melanogaster* is an excellent model system to evaluate homologs of  
93 neurodevelopmental genes, as many developmental processes and signaling pathways are  
94 conserved between humans and flies<sup>38</sup>. In fact, over 75% of human disease genes have homologs  
95 in *Drosophila*, including many genes involved in cellular signaling processes<sup>39,40</sup>. We recently  
96 examined the contributions of individual *Drosophila* homologs of 28 genes within the 16p11.2  
97 and 3q29 deletion regions towards specific neurodevelopmental phenotypes, including rough eye  
98 phenotypes and defects in climbing ability, axon targeting, neuromuscular junction, and dendritic  
99 arborization<sup>41,42</sup>. While these findings implicated multiple genes within each CNV region  
100 towards neuronal phenotypes, the conserved role of these genes towards non-neuronal  
101 phenotypes is not well understood. The *Drosophila* wing is an effective model system to  
102 evaluate such developmental phenotypes, as key components of conserved signaling pathways,  
103 such as Notch, epidermal growth factor receptor (EGFR), Hedgehog, and Wnt pathways, were  
104 identified using fly wing models<sup>43-49</sup>. For example, Wu and colleagues showed that  
105 overexpression of the *Drosophila* homolog for *UBE3A*, associated with Angelman syndrome,  
106 leads to abnormal wing and eye morphology defects<sup>50</sup>. Furthermore, *Drosophila* mutant screens  
107 for developmental phenotypes, including wing defects, were used to identify conserved genes for  
108 several human genetic diseases, including Charcot-Marie-Tooth disease and syndromic

109 microcephaly<sup>51</sup>. Kochinke and colleagues also recently performed a large-scale screening of ID-  
110 associated genes, and found an enrichment of wing trichome density and missing vein  
111 phenotypes in ID genes compared to control gene sets<sup>52</sup>. Hence, the fly wing provides a model  
112 system that is ideal for evaluating the contributions of individual homologs of CNV genes  
113 towards cellular and developmental phenotypes.

114 In this study, we tested the non-neuronal phenotypes of 79 fly homologs of human genes  
115 within ten pathogenic CNV regions and genes associated with neurodevelopmental disorders.  
116 We observed a wide range of robust qualitative and quantitative adult wing phenotypes among  
117 the 136 RNA interference (RNAi) lines tested in our study, including size defects, ectopic and  
118 missing veins, severe wrinkling, and lethality. Further analysis of cellular phenotypes revealed  
119 disruptions in conserved developmental processes in the larval imaginal wing disc, including  
120 altered levels of cell proliferation and apoptosis as well as altered expression patterns in the Wnt,  
121 Hedgehog, and Notch signaling pathways. However, we found no correlation in the severity of  
122 phenotypes observed with wing and eye-specific knockdown. Our findings were further  
123 supported by differences in expression patterns and network connectivity of human CNV genes  
124 across different tissues. Our analysis emphasizes the importance of multiple genes within each  
125 CNV region towards both global and tissue-specific developmental processes, potentially  
126 accounting for the non-neuronal phenotypes associated with pathogenic CNVs.

127

## 128 RESULTS

### 129 Wing-specific knockdown of fly homologs of CNV genes show non-neuronal phenotypes

130 Using an RNAi based analysis driven by the *bx<sup>MS1096</sup>-GAL4* wing-specific driver, we tested a  
131 total of 136 RNAi lines for 59 homologs of genes within pathogenic CNV regions (chromosomal  
132 locations 1q21.1, 3q29, 7q11.23, 15q11.2, 15q13.3, 16p11.2, distal 16p11.2, 16p12.1, 16p13.11,  
133 and 17q12) and 20 homologs of genes associated with neurodevelopmental disorders (**Supp.**  
134 **Data 1**). Fly homologs of these genes were identified using the DIOPT orthology prediction  
135 tool<sup>53</sup>. We list both the human gene name and the fly gene name for each tested gene as *HUMAN*  
136 *GENE/Fly gene* (i.e. *KCTD13/CG10465*) as well as the human CNV region for context at first  
137 instance. We scored 20-25 adult wings for five distinct wing phenotypes in each non-lethal  
138 RNAi line, including wrinkled wing, discoloration, ectopic veins, missing veins, and bristle  
139 planar polarity phenotypes (**Fig. 2A; Supp. Data 2**). We first categorized each wing phenotype  
140 based on their severity and performed k-means clustering analysis to categorize each RNAi line  
141 by their overall phenotype severity (**Fig. 2B-C**). We observed four clusters of RNAi lines: 75  
142 lines with no observable qualitative phenotypes (55.2%), 24 lines with mild phenotypes (17.7%),  
143 10 lines with moderate phenotypes (7.4%), 21 lines with severe phenotypes (15.4%), and 6 lines  
144 with lethal phenotypes (4.4%), including *ACACA/ACC* within 17q12, *DLG1/dlg1* within 3q29,  
145 and *STX1A/Syx1A* within 7q11.23 (**Fig. 2B-D; Supp. Data 2**). We observed severe wrinkled  
146 wing phenotypes for 13/79 fly homologs, including *PPP4C/Pp4-19C* within 16p11.2,  
147 *ATXN2L/Atx2* within distal 16p11.2, *AATF/Aatf* within 17q12, and *MFI2/Tsf2* within 3q29 (**Fig.**  
148 **3A-B, Supp. Data 3**). Interestingly, seven out of ten CNV regions contained at least one  
149 homolog that showed lethality or severe wing phenotypes, and five CNV regions (3q29, 16p11.2,  
150 distal 16p11.2, 16p12.1, and 17q12) had multiple homologs showing lethality or severe wing

151 phenotypes (**Fig. 3A, Supp. Data 3**). For example, RNAi lines for both *UQCRC2/UQCR-C2* and  
152 *POLR3E/Sin* within 16p12.1 showed lethality. Within the 3q29 region, *NCBP2/Cbp20* and  
153 *MFI2/Tsf2* showed severe phenotypes while *DLG1/dlg1* showed lethality. In contrast, 12/20  
154 known neurodevelopmental genes showed no observable wing phenotypes, suggesting that these  
155 genes could be responsible for neuronal-specific phenotypes (**Fig. 3B, Supp. Data 3**). We note  
156 that 18/79 fly homologs showed discordant phenotypes between two or more RNAi lines for the  
157 same gene, which could be due to differences in expression of the RNAi construct among these  
158 lines (**Supp. Data 3**).

159       Certain qualitative phenotypes exhibited higher frequency in males compared to females.  
160 For example, discoloration (87 lines in males compared to 56 lines in females;  $p=1.315\times 10^{-4}$ ,  
161 two-tailed Fisher's exact test) and missing vein phenotypes (92 lines in males compared to 29  
162 lines in females;  $p=2.848\times 10^{-16}$ , two-tailed Fisher's exact test) at any degree of severity were  
163 more commonly observed in males than females (**Supp. Data 2**). In particular, 25/92 lines in  
164 males (compared to 1/29 in females) showed a total loss of the anterior crossvein (ACV) (**Supp.**  
165 **Data 2**). We further identified 17 RNAi lines that were lethal in males with wing-specific  
166 knockdown of fly homologs. While higher frequencies of wing phenotypes in males could be  
167 due to a sex-specific bias of developmental phenotypes, the increased severity we observed in  
168 males is most likely due to a stronger RNAi knockdown caused by an X-linked dosage  
169 compensation, as the *bx<sup>MS1096</sup>-GAL4* driver is inserted on the fly X chromosome<sup>54,55</sup>.

170       Next, we measured the total adult wing area and the lengths of six veins (longitudinal L2,  
171 L3, L4, L5, ACV, and posterior crossvein or PCV) in the adult wing for each of the tested RNAi  
172 lines that did not show lethality (or severe wrinkled phenotypes for vein length measurements)  
173 (**Fig. 4A**). Overall, we identified significant wing measurement changes for 89 RNAi lines



174 compared to controls, which included lines that did not have an observable qualitative wing  
175 phenotype (**Fig. 2D**). A summary of L3 vein lengths is presented in **Fig. 4B**, and the  
176 measurements for the remaining five veins are presented in **Supp. Figure 1** and **Supp. Data. 2**.  
177 We found that 33/61 of the homologs (54%) showed significant changes in L3 vein length,  
178 including 20 homologs with longer vein lengths and 13 homologs with shorter vein lengths  
179 (**Supp. Data 3**). Additionally, 41/74 of the fly homologs (55%) showed changes in wing area  
180 (**Supp. Data 3**), including 36 homologs which showed smaller wing areas and five homologs  
181 showed larger wing areas compared to controls (**Supp. Data 3**). For example, both homologs of  
182 genes within 1q21.1 region, *BCL9/lgs* and *FMO5/Fmo-2*, showed decreased wing area and vein  
183 length, potentially mirroring the reduced body length phenotype observed in mouse models of  
184 the deletion<sup>56</sup> (**Fig. 4B-C**). In addition, *PAK2/Pak* within 3q29, *TBX1/org-1* within 22q11.2,  
185 autism-associated *CHD8/kis*, and microcephaly-associated *ASPM/asp* also showed smaller wing  
186 areas and vein lengths (**Fig. 4B-C**). In contrast, *TRPM1/Trpm* within 15q13.3 and the cell  
187 proliferation gene *PTEN/Pten*<sup>57</sup> both showed larger wing areas and vein lengths (**Fig. 4B-C**).  
188 Furthermore, we identified eight homologs that showed no qualitative wing phenotypes but had  
189 significant changes in wing areas and vein lengths (**Supp. Data 3**), including *CCDC101/Sgf29* in  
190 distal 16p11.2, *FMO5/Fmo-2*, *TRPM1/Trpm*, *DHRS11/CG9150* in 17q12, and *NSUN5/Nsun5* in  
191 7q11.23 (**Fig. 4B-C; Supp. Data 3**). These results indicate that homologs of certain CNV genes  
192 may influence variations in size without causing adverse wing phenotypes, and may be  
193 specifically implicated towards cellular growth mechanisms.

194

195

196

## 197 **Homologs of CNV genes show global and tissue-specific effects during development**

198 We previously showed that many of the same fly homologs of CNV genes that showed wing  
199 defects in the current study also contributed towards neuronal phenotypes in the fly eye<sup>41,42</sup>,  
200 suggesting a role for these genes in global development. We therefore performed ubiquitous and  
201 eye-specific knockdown of fly homologs to assess tissue-specific effects in comparison to the  
202 wing phenotypes. First, we used the *da-GAL4* driver at 25°C to drive ubiquitous knockdown of  
203 RNAi lines for 31 homologs of CNV genes, including 19 that were previously published<sup>41,42</sup>, and  
204 observed complete or partial lethality at larval and pupal stages with knockdown of 10/31  
205 homologs (32.3%) (**Fig. 5A**). Lethal phenotypes have also been documented for 43/130  
206 knockout mouse models of individual CNV genes as well as for the entire deletion (**Supp. Data**  
207 **4**). For example, mouse models heterozygous for the 16p11.2 deletion showed partial neonatal  
208 lethality, while knockout mouse models of four individual genes within the 16p11.2 region,  
209 including *Ppp4C*<sup>-/-</sup> and *Kif22*<sup>-/-</sup>, showed embryonic lethality<sup>25,58,59</sup>. In our study, the *DLG1/dlg1*  
210 line that showed lethality with wing-specific knockdown also exhibited larval lethality with  
211 ubiquitous knockdown, indicating its role in global development (**Fig. 5A**). In addition, six  
212 homologs that showed severe wing phenotypes also showed larval or pupal lethality with  
213 ubiquitous knockdown, including *ALDOA/Ald* and *PPP4C/Pp4-19C* within 16p11.2 and  
214 *ATXN2L/Atx2* and *TUFM/mEFTu1* within distal 16p11.2 (**Fig. 5A**). The remaining homologs  
215 that showed lethality with ubiquitous knockdown showed at least a mild qualitative or  
216 quantitative wing phenotype.

217 We next compared the phenotypes observed with wing-specific knockdown of fly  
218 homologs to their corresponding eye-specific knockdowns to evaluate neuronal versus non-  
219 neuronal effects. To quantitatively assess the phenotypic severity of cellular defects with eye-

220 specific knockdown of fly homologs, we developed a tool called *Flynotyper*<sup>60</sup> that determines the  
221 degree of disorganization among the ommatidia in the adult eye. We analyzed phenotypic scores  
222 obtained from *Flynotyper* for 66 RNAi lines of 45 fly homologs, including from previously-  
223 published datasets<sup>41,42,60</sup>. We found that 37/45 homologs (82.2%) exhibited both eye and wing-  
224 specific defects (**Fig. 5B, Supp. Fig. 2, Supp. Data 5**). Two homologs with significant eye  
225 phenotypes did not show any wing phenotypes, including *SPNS1/spin* within distal 16p11.2 and  
226 microcephaly-associated *SLC25A19/Tpc1*<sup>61</sup>, while five homologs only showed wing-specific  
227 phenotypes, including *CDIPT/Pis* and *YPEL3/CG15309* within 16p11.2, *FBXO45/Fsn* and  
228 *OSTalpha/CG6836* within 3q29, and *UQCRC2/UQCR-C2* (**Fig. 5B, Supp. Fig. 2**). In particular,  
229 *UQCRC2/UQCR-C2* showed lethality with wing-specific knockdown, suggesting potential  
230 tissue-specific effects of this gene in non-neuronal cells (**Fig. 5B**). While most homologs  
231 contributed towards both eye and wing-specific phenotypes, we observed a wide range of  
232 severity in eye phenotypes that did not correlate with the severity of quantitative or qualitative  
233 wing phenotypes (**Fig. 5C**). For example, *TUFM/mEFTu1* showed a severe wing phenotype but  
234 only a mild increase in eye phenotypic score, while *SH2B1/Lnk*, also within the distal 16p11.2  
235 region, showed severe rough eye phenotypes but only a mild increase in wing size (**Fig. 5D**).  
236 Similarly, *BCL9/lgs* also showed opposing tissue-specific effects with mild qualitative wing  
237 phenotype and severe eye phenotype, suggesting that the role of these homologs towards  
238 development differs across tissue types.

239

#### 240 **CNV genes show variable expression across different tissues in flies and humans**

241 To assess how expression levels of CNV genes vary across different tissues, we first examined  
242 the expression patterns of fly homologs in larval and adult tissues using the FlyAtlas Anatomical

243 Microarray dataset<sup>62</sup>. We found that 76/77 homologs with available data were expressed in at  
244 least one larval and adult tissue (**Supp. Fig. 3, Supp. Data 6**). In general, we did not observe a  
245 correlation between wing phenotype severity and expression patterns of homologs in larval or  
246 adult tissues (**Fig. 6A**). For example, 58/77 homologs (75.3%) showed ubiquitous larval  
247 expression, including both fly homologs that showed no qualitative wing phenotypes, such as  
248 *KCTD13/CG10465* within 16p11.2 and *FBXO45/Fsn*, and those with severe wing phenotypes,  
249 such as *PPP4C/Pp4-19C* and *NCBP2/Cbp20* (**Fig. 6A, Supp. Fig. 3**). Furthermore, 30/39  
250 homologs (76.9%) that showed eye phenotypes also had ubiquitous larval expression, providing  
251 further support to the observation that genes causing neuronal phenotypes may also contribute to  
252 developmental phenotypes in other tissues (**Supp. Data 5**). Of note, 9/77 homologs (11.7%) did  
253 not have any expression in the larval central nervous system, including *FMO5/Fmo-2*,  
254 *BDHI/CG8888* within 3q29, and *TBX6/Doc2* within 16p11.2 (**Fig. 6A, Supp. Fig. 3**). However,  
255 we observed wing phenotypes for 8/9 of these homologs, suggesting that they may contribute to  
256 tissue-specific phenotypes outside of the nervous system. Except for the epilepsy-associated  
257 *SCN1A/para*<sup>63</sup>, which was exclusively expressed in both the larval central nervous system (CNS)  
258 and adult brain tissues, other tested neurodevelopmental genes were also expressed in non-  
259 neuronal tissues (**Fig. 6A**).

260 We further used the GTEx Consortium dataset<sup>64</sup> to examine tissue-specific expression of  
261 150 human CNV and known neurodevelopmental genes across six tissues including brain, heart,  
262 kidney, lung, liver, and muscle. We found 121 genes that were expressed in at least one adult  
263 tissue, including 49 genes (32.7%) that showed ubiquitous expression across all six tissues  
264 (**Supp. Data 6**). Of the 112 genes expressed in non-neuronal tissues, 34 did not have any  
265 neuronal expression, including *TBX1*, *FMO5* and *GJA5* within 1q21.1, and *ATP2A1* within distal

266 16p11.2 (**Fig. 6B, Supp. Data 6**). *FMO5* and *TBX1* also showed non-neuronal expression in  
267 *Drosophila* tissues, suggesting that their tissue-specific expression is highly conserved (**Fig. 6A**).  
268 Other genes showing ubiquitous expression also had preferentially high expression for specific  
269 non-neuronal tissues, including *ALDOA* and *UQCRC2* for muscle and heart for (**Fig. 6B**). In  
270 contrast, we found nine genes that were expressed only in the adult brain, including *FAM57B*  
271 and *DOC2A* within 16p11.2, as well as *SCN1A*, which showed similar CNS-only expression in  
272 *Drosophila* tissues (**Fig. 6B, Supp. Data 6**).

273

#### 274 **Knockdown of fly homologs of CNV genes lead to disruption of basic cellular processes**

275 The disruption of basic cellular processes in neuronal cells, such as cell proliferation and  
276 apoptosis, have been implicated in neurodevelopmental disorders<sup>65-67</sup>. We previously identified  
277 defects in cell proliferation among photoreceptors neurons in larval eye discs with knockdown of  
278 16p11.2 homologs, as well as increased apoptosis with knockdown of a subset of 3q29  
279 homologs<sup>41,42</sup>. Here, we explored how these basic cellular processes are altered in non-neuronal  
280 cells, specifically in the developing wing disc. We targeted 27 fly homologs that showed a range  
281 of adult wing phenotypes for changes in cell proliferation and apoptosis, using anti-phospho-  
282 Histone H3 Ser10 (pH3) and anti-*Drosophila* caspase-1 (*dcp1*), respectively, in the third instar  
283 larval wing discs. We identified 23/27 homologs that showed significant increases in apoptotic  
284 cells compared to controls, including seven homologs, such as *PPP4C/Pp4-19C*, *ATXN2L/Atx2*,  
285 and *AATF/Aatf*, which showed *dcp1* staining across the entire larval wing pouch (**Fig. 7A-B,**  
286 **Supp. Figs. 4-5, Supp. Data 7**). In addition, 16/27 genes showed decreased levels of  
287 proliferation, including eight homologs which also showed apoptosis defects, such as  
288 *CYFIP1/Sra-1* within 15q11.2, *SH2B1/Lnk*, and the microcephaly gene *KIF11/Klp61F* (**Fig. 7A**

289 **and 7C, Supp. Figs. 4-5, Supp. Data 7).** All six of the tested homologs with severe adult wing  
290 phenotypes showed both increased apoptosis and decreased proliferation (**Supp. Data 7**).  
291 Similarly, 3/4 homologs of genes showing lethality with wing-specific knockdown also showed  
292 defects in apoptosis or proliferation, with the exception of *ACACA/ACC* (**Supp. Figure 4, Supp.**  
293 **Data 7**). As *bx<sup>MS1096</sup>-GAL4* is located on the X-chromosome, we expected to see more severe  
294 defects in males compared with females with knockdown of homologs due to the X-linked  
295 dosage compensation<sup>54,55</sup>. However, knockdown of 3/11 tested homologs with sex-specific  
296 differences in adult wing phenotypes, including *BCL9/lgs*, *CYFIP1/Sra-1*, and  
297 *DNAJC30/CG11035* within 7q11.23, showed significantly decreased levels of cell proliferation  
298 in females but no change for males compared to their respective controls, suggesting a sex-  
299 specific effect of these genes for cell proliferation (**Supp. Fig. 5, Supp. Data 7**). Overall, our  
300 results suggest that cell proliferation and apoptosis play an important role towards development  
301 in both neuronal and non-neuronal tissues.

302

### 303 **Homologs of candidate CNV genes disrupt conserved signaling pathways**

304 Several conserved signaling pathways that are active in a spatial and temporal manner in the  
305 larval wing disc, such as Wnt, Hedgehog, BMP, and Notch signaling, regulate the anterior-  
306 posterior (A/P) and dorsal-ventral (D/V) boundaries to determine accurate morphology and vein  
307 patterning in the adult wing<sup>48,49,68-70</sup>. For example, Wnt and Notch signaling pathways both act  
308 along the D/V boundary to determine cell fate<sup>71,72</sup>, while Hedgehog signaling is dependent upon  
309 expression of both engrailed in the posterior compartment and patched along the A/P border<sup>73,74</sup>.  
310 Furthermore, O’Roak and colleagues showed that genes identified from *de novo* mutations in  
311 patients with autism are linked to  $\beta$ -catenin/Wnt pathway<sup>75</sup>. In addition, familial loss-of-function

312 mutations in the human hedgehog signaling pathway gene *PTCH1* are implicated in basal cell  
313 nevus syndrome, leading to basal cell carcinoma<sup>76,77</sup>.

314       Based on adult wing phenotypes and disruptions to cellular processes, we next tested  
315 whether knockdown of 14 fly homologs disrupt conserved signaling pathways in the third instar  
316 larval wing disc (**Supp. Data 7**). In particular, we evaluated the role of Wnt, Hedgehog, and  
317 Notch signaling pathways by testing the expression patterns of four key proteins within these  
318 pathways, including wingless (Wnt), patched (Hedgehog), engrailed (Hedgehog), and delta  
319 (Notch). We found that 9/14 homologs, including 8/10 homologs showing severe wing  
320 phenotypes or lethality, exhibited disruptions in at least one signaling pathway. For example, five  
321 homologs with severe or lethal phenotypes showed disruptions of all four signaling pathways,  
322 including *AATF/Aatf*, *NCBP2/Cbp20*, *POLR3E/Sin*, *PPP4C/Pp4-19C*, and *KIF11/Klp61F* (**Fig.**  
323 **8, Supp. Data 7**). Our observations are in concordance with previous findings by Swarup and  
324 colleagues, who showed that *PPP4C/Pp4-19C* is a candidate regulator of Wnt and Notch  
325 signaling pathways in *Drosophila* larval wing discs<sup>78</sup>. Furthermore, two genes from the 3q29  
326 region, *DLG1/dlg1* and *MFI2/Tsf2*, showed altered expression patterns for delta and patched but  
327 not for engrailed, indicating that they selectively interact with the Hedgehog as well as Notch  
328 signaling pathway (**Supp. Fig. 6**). In fact, Six and colleagues showed that Dlg1 directly binds to  
329 the PDZ-binding domain of Delta<sup>79</sup>. In contrast, *ACACA/ACC* and *UQCRC2/UQCR-C2* showed  
330 no changes in expression patterns for any of the four signaling proteins tested, suggesting that the  
331 observed lethality could be due to other cellular mechanisms (**Supp. Fig. 6**). We conclude that a  
332 subset of homologs disrupt the expression of key proteins in signaling pathways, potentially  
333 accounting for the developmental phenotypes observed in the adult wings.

334

### 335 **Connectivity patterns of candidate genes vary across human tissue-specific networks**

336 We examined patterns of connectivity for the nine candidate genes which showed disruptions of  
337 signaling pathways within the context of human brain, heart, and kidney-specific gene  
338 interaction networks<sup>80</sup>. These tissue-specific networks were constructed using Bayesian  
339 classifier-generated probabilities for pairwise genetic interactions based on co-expression data<sup>80</sup>.  
340 We calculated the lengths of the shortest paths between each candidate gene and 267 Wnt,  
341 Notch, and Hedgehog pathway genes in each network as a proxy for connectivity (**Supp. Data**  
342 **8**). In all three networks, each of the candidate genes were connected to a majority of the tested  
343 signaling pathway genes, suggesting that our results have translational relevance towards human  
344 developmental pathways (**Fig. 9A, Supp. Fig. 7**). Interestingly, we observed a higher  
345 connectivity (i.e. shorter path distances) between candidate genes and Wnt and Hedgehog  
346 pathway genes in the brain-specific network compared to the heart and kidney-specific networks  
347 (**Fig. 9B**). We further identified enrichments for genes involved in specific biological processes  
348 among the connector genes that were located in the shortest paths within neuronal and non-  
349 neuronal tissue-specific networks (**Fig. 9C, Supp. Data 8**). For example, axon-dendrite  
350 transport, dopaminergic signaling, and signal transduction functions were enriched among  
351 connector genes only for the brain-specific network, while organelle organization and protein  
352 ubiquitination were enriched among connector genes only for kidney and heart networks (**Fig.**  
353 **9C**). However, several core biological processes, such as cell cycle, protein metabolism,  
354 transcriptional regulation, and RNA processing/splicing, were enriched among connector genes  
355 within all three tissue-specific networks (**Fig. 9C**). Our analysis highlights that human CNV  
356 genes potentially interact with developmental signaling pathways in an ubiquitous manner, but  
357 may affect different biological processes in neuronal and non-neuronal tissues.



## 358 **DISCUSSION**

359 We used the *Drosophila* wing as a model to identify key CNV genes involved in non-neuronal  
360 phenotypes associated with CNV disorders. We tested fly homologs of 79 genes and identified  
361 multiple homologs within each CNV region that exhibited strong phenotypes indicative of  
362 developmental disruptions. Several themes have emerged from our study highlighting the  
363 importance of fly homologs of CNV genes towards both global and tissue-specific phenotypes  
364 associated with human CNV disorders.

365 *First*, we found that homologs of CNV genes contribute towards developmental  
366 phenotypes through ubiquitous roles in neuronal and non-neuronal tissues. Although we did not  
367 study models for the entire CNV, nearly all individual fly homologs of CNV genes contribute to  
368 wing-specific developmental phenotypes. It is likely that these genes may also contribute to  
369 additional phenotypes in other tissues that we did not assess. In fact, a subset of these genes also  
370 showed early lethality with ubiquitous knockdown in addition to severe or lethal wing-specific  
371 phenotypes. However, we found no correlation between the severity of the eye and wing  
372 phenotypes, suggesting tissue-specific effects of these homologs towards developmental  
373 phenotypes. In contrast, fly homologs of known neurodevelopmental genes generally showed  
374 milder wing phenotypes compared with eye phenotypes, indicating a more neuronal role for  
375 these genes. While our study only examined a subset of CNV genes with *Drosophila* homologs,  
376 phenotypic data from knockout mouse models also support a global developmental role for  
377 individual CNV genes. In fact, 44/130 knockout models of CNV genes within the Mouse  
378 Genome Informatics (MGI) database<sup>81</sup> exhibited non-neuronal phenotypes, including 20  
379 homologs of CNV genes that showed both neuronal and non-neuronal phenotypes (**Supp. Data**  
380 **4**). For example, knockout mouse models of *Dlg1*<sup>-/-</sup> show defects in dendritic growth and

381 branching in the developing nervous system, in addition to craniofacial features and multiple  
382 kidney and urinary tract defects<sup>82-85</sup>. Furthermore, Chapman and colleagues showed that  
383 knockout of *Tbx6*<sup>-/-</sup> caused defects in mesodermal and neuronal differentiation early in  
384 development, leading to abnormal vascular, tail bud, and neural tube morphology<sup>86</sup>. These  
385 observations further support our findings that most fly homologs of CNV genes have a global  
386 role in development that could account for the observed non-neuronal phenotypes.

387 *Second*, based on tissue-specific phenotypes, we identified fly homologs of CNV genes  
388 that are key regulators of conserved cellular processes important for development. For example,  
389 9/10 homologs with severe or lethal adult wing phenotypes also exhibited defects in cell  
390 proliferation and apoptosis during development. In fact, we found concordance between cellular  
391 processes affected by wing and eye-specific knockdown of homologs of genes within 16p11.2  
392 and 3q29 regions, including decreased proliferation for *MAPK3/rl* and increased apoptosis for  
393 *NCBP2/Cbp20* and *DLG1/dlg1*<sup>41,42</sup>. While eye-specific knockdown of *BDHI/CG8888* showed  
394 decreased cell proliferation in larval eye discs<sup>42</sup>, we found increased cell proliferation with wing-  
395 specific knockdown, suggesting a tissue-specific effect for this gene. Notably, at least one fly  
396 homolog per CNV region showed defects in cell proliferation or apoptosis, suggesting that these  
397 conserved cellular processes may be relevant to CNV pathogenicity. For example, *ATXN2L/Atx2*,  
398 *SH2B1/Lnk*, and *CCDC101/Sgf29* each showed decreased proliferation and increased apoptosis,  
399 suggesting an underlying common conserved cellular mechanism for the distal 16p11.2 deletion.  
400 Furthermore, a subset of these genes also disrupted multiple signaling pathways, indicating a  
401 potential role for these genes as key regulators of developmental processes. We specifically  
402 identified five genes whose knockdown caused disruptions of Wnt, Notch, and hedgehog  
403 signaling pathways. Each of these genes have important roles in cell cycle regulation, apoptosis,

404 transcription, or RNA processing, based on Gene Ontology annotations<sup>87,88</sup>. In fact, we found  
405 that the RNA transport protein *NCBP2/Cbp20*<sup>89</sup>, which we recently identified as a key modifier  
406 gene for the 3q29 deletion<sup>42</sup>, interfaced with all three signaling pathways. Furthermore, *AATF*  
407 disrupts apoptosis and promotes cell cycle progression through displacement of HDAC1<sup>90-92</sup>,  
408 while *PPP4C* promotes spindle organization at the centromeres during mitosis<sup>93</sup>. While we only  
409 evaluated the role of these genes towards development in a single fly tissue, our additional  
410 analysis of human gene interaction networks showed strong connectivity between the CNV  
411 genes and signaling pathways in multiple neuronal and non-neuronal human tissues. In fact, cell  
412 cycle genes were enriched among the connector genes in all three tissue-specific networks,  
413 further emphasizing the role of cell cycle processes towards developmental phenotypes. Notably,  
414 we also observed certain biological processes enriched among connector genes that were specific  
415 to neuronal or non-neuronal tissues, indicating that haploinsufficiency of genes within CNV  
416 regions may disrupt different biological processes in a tissue-specific manner.

417 *Overall*, we show that fly homologs of most CNV genes contribute towards global  
418 developmental phenotypes, although exactly how they contribute toward such phenotypes varies  
419 between neuronal and non-neuronal tissues. Previous functional studies for CNV disorders have  
420 focused primarily on identifying candidate genes for the observed neuronal phenotypes. In this  
421 study, we identified several homologs of CNV genes that are responsible for non-neuronal  
422 phenotypes, as well as novel associations between these genes and conserved biological  
423 processes and pathways. We therefore propose that multiple genes within each CNV disrupt  
424 global and tissue-specific processes during development and contribute to the wide range of non-  
425 neuronal phenotypes associated with CNV disorders (**Fig. 10**). This multigenic model for non-  
426 neuronal phenotypes in CNV disorders is in line with our previous model for neuronal

427 phenotypes of these disorders, as opposed to models where individual causative genes are  
428 responsible for specific phenotypes<sup>41,42,94</sup>. Our study further exemplifies the utility of evaluating  
429 non-neuronal phenotypes in addition to neuronal phenotypes in models of individual genes and  
430 CNV regions associated with developmental disorders, including future studies in mammalian or  
431 cellular model systems. Further studies exploring how CNV genes interact with each other and  
432 with other developmental pathways could more fully explain the conserved mechanisms  
433 underlying global developmental defects and identify potential therapeutic targets for these  
434 disorders.

## 435 METHODS

### 436 Fly stocks and genetics

437 We tested 59 *Drosophila* homologs for 130 human genes that span across 10 pathogenic CNV  
438 regions associated with neurodevelopmental disorders (1q21.1, 3q29, 7q11.23, 15q11.2, 15q13.3,  
439 16p11.2, distal 16p11.2, 16p12.1, 16p13.11, and 17q12)<sup>22</sup> (**Supp. Data 1**). In addition, we  
440 evaluated fly homologs of 20 human genes known to be involved in neurodevelopmental  
441 disorders<sup>60,95</sup> (**Supp. Data 1**). These include genes involved in beta-catenin signaling pathway (5  
442 genes), core genes implicated in neurodevelopmental disorders (8 genes), and genes associated  
443 with microcephaly (7 genes)<sup>96</sup>. We used the DRSC Integrative Ortholog Prediction Tool  
444 (DIOPT, v.7.1) to identify the fly homologs for each human gene<sup>53</sup> (**Supp. Data 1**).

445 To knockdown individual genes in specific tissues, we used RNA interference (RNAi)  
446 and the *UAS-GAL4* system (**Fig. 2A**), a well-established tool that allows for tissue-specific  
447 expression of a gene of interest<sup>97</sup>. RNAi lines were obtained from Vienna *Drosophila* Resource  
448 Center (VDRC) that include both GD and KK lines. We tested a total of 136 lines in our final  
449 data analysis (**Supp. Data 9**), after eliminating KK lines with additional insertion that drives the  
450 overexpression of the Tiptop (*tio*) transcription factor<sup>98,99</sup>. A complete list of stock numbers and  
451 full genotypes for all RNAi lines used in this study is presented in **Supp. Data 9**. We used the  
452 *bx<sup>MS1096</sup>-GAL4/FM7c;;UAS-Dicer2/TM6B* driver for wing-specific knockdown and *w<sup>1118</sup>;GMR-*  
453 *GAL4;UAS-Dicer2* driver (Claire Thomas, Penn State University) for eye-specific knockdown of  
454 RNAi lines. Ubiquitous knockdown experiments were performed using the *w;da-GAL4;+* driver  
455 (Scott Selleck, Penn State University). For all experiments, we used appropriate GD (*w<sup>1118</sup>,*  
456 *VDRC# 60000*) or KK (*y,w<sup>1118</sup>; P{attP,y<sup>+</sup>,w<sup>3</sup>}*, *VDRC# 60100*) lines as controls to compare  
457 against lines with knockdown of individual homologs. All fly lines were reared on standard yeast

458 *Drosophila* medium at room temperature. All crosses were set and maintained at 25°C, except  
459 for the eye knockdown experiments which were maintained at 30°C.

460

#### 461 **Phenotypic analysis of adult wing images**

462 Adult progeny were isolated from crosses between RNAi lines and *bx<sup>MS1096</sup>-GAL4* driver shortly  
463 after eclosion, and kept at 25°C until day 2-5 (**Fig. 2A**). At that point, the progeny were frozen at  
464 -80°C, and were then moved to -20°C prior to imaging and storage. Approximately 20-25  
465 progeny, both male and female, were collected for each RNAi line tested. The adult wings were  
466 plucked from frozen flies and mounted on a glass slide. The slides were covered with a coverslip  
467 and sealed using clear nail polish. Adult wing images were captured using a Zeiss Discovery  
468 V20 stereoscope (Zeiss, Thornwood, NY, USA), with a ProgRes Speed XT Core 3 camera and  
469 CapturePro v.2.8.8 software (Jenoptik AG, Jena, Germany) at 40X magnification.

470 For each non-lethal RNAi line, we scored the adult wing images for five qualitative  
471 phenotypes, including wrinkled wing, discoloration, missing veins, ectopic veins, and bristle  
472 planar polarity defects, on a scale of 1 (no phenotype) to 5 (lethal) (**Fig. 3C**). Lines showing  
473 severely wrinkled wings or lethality were scored as 4 (severe) or 5 (lethal) for all five  
474 phenotypes. We calculated the frequency of each phenotypic score (i.e. mild bristle polarity,  
475 moderate discoloration) across all of the wing images for each line (**Fig. 3A-B**), and then  
476 performed k-means clustering of these values to generate five clusters for overall wing  
477 phenotypes (**Fig. 2C**). For quantitative analysis of wing phenotypes, we used the Fiji ImageJ  
478 software<sup>100</sup> to calculate the wing area using the Measure Area tool, and calculated the lengths of  
479 longitudinal veins L2, L3, L4, and L5 as well as the anterior and posterior crossveins (ACV and  
480 PCV), by tracing individual veins using the Segmented Line tool (**Fig. 4A, Supp. Data 2**). We

481 determined discordant homologs when RNAi lines for the same homologs showed inconsistent  
482 wing phenotypes. For each homolog with multiple RNAi lines, we checked discordance among  
483 RNAi lines for no phenotype versus any qualitative or quantitative phenotypes, followed by  
484 discordance for small or large wing measurement phenotypes (**Supp. Data 3**).

485

### 486 **Phenotypic analysis of adult eye images**

487 We crossed RNAi lines with *GMR-GAL4* to achieve eye-specific knockdown of homologs of  
488 CNV and known neurodevelopmental genes. Adult 2-3-day old female progenies from the  
489 crosses were collected, immobilized by freezing at -80°C, and then moved to -20°C prior to  
490 imaging and storage. Flies were mounted on Blu-tac (Bostik Inc, Wauwatosa, WI, USA) and  
491 imaged using an Olympus BX53 compound microscope with LMPLan N 20X air objective using  
492 a DP73 c-mount camera at 0.5X magnification (Olympus Corporation, Tokyo, Japan). CellSens  
493 Dimension software (Olympus Corporation, Tokyo, Japan) was used to capture the eye images,  
494 which were then stacked using the Zerene Stacker software (Zerene Systems LLC, Richland,  
495 WA, USA). All eye images presented in this study are maximum projections of 20 consecutive  
496 optical z-sections, at a z-step size of 12.1µm. Finally, we used our computational method called  
497 *Flynotyper* (<https://flynotyper.sourceforge.net>) to quantify the degree of rough eye phenotypes  
498 present due to knockdown of homologs of CNV or neurodevelopmental genes<sup>60</sup>. *Flynotyper*  
499 scores for homologs of 16p11.2 and 3q29, as well as select core neurodevelopmental genes, were  
500 derived from our previous studies<sup>41,42,60</sup>.

501

502

503

## 504 **Immunohistochemistry**

505 Wing imaginal discs from third instar larvae were dissected in 1X PBS. The tissues were fixed  
506 using 4% paraformaldehyde and blocked using 1% bovine serum albumin (BSA). The wing discs  
507 were incubated with primary antibodies using appropriate dilutions overnight at 4°C. We used  
508 the following primary antibodies: mouse monoclonal anti-pHistone3 (S10) (1:100 dilutions, Cell  
509 Signaling 9706L), rabbit polyclonal anti-cleaved *Drosophila* Dcp1 (Asp216) (1:100 dilutions,  
510 Cell Signaling 9578S), mouse monoclonal anti-Wingless (1:200 dilutions, DSHB, 4D4), mouse  
511 monoclonal anti-Patched (1:50 dilutions, DSHB, *Drosophila* Ptc/APA1), mouse monoclonal  
512 anti-Engrailed (1:50 dilutions, DSHB, 4D9), and mouse monoclonal anti-Delta (1:50 dilutions,  
513 DSHB, C594.9B). Following incubation with primary antibodies, the wing discs were washed  
514 and incubated with secondary antibodies at 1:200 dilution for two hours at room temperature.  
515 We used the following secondary antibodies: Alexa Fluor 647 dye goat anti-mouse (A21235,  
516 Molecular Probes by Invitrogen/Life Technologies), Alexa Fluor 568 dye goat anti-rabbit  
517 (A11036, Molecular Probes by Invitrogen/Life Technologies), and Alexa Fluor 568 dye goat  
518 anti-mouse (A11031, Molecular Probes by Invitrogen/Life Technologies). All washes and  
519 antibody dilutions were made using 0.3% PBS with Triton-X.

520 Third instar larvae wing imaginal discs were mounted in Prolong Gold antifade reagent  
521 with DAPI (Thermo Fisher Scientific, P36930) for imaging using an Olympus Fluoview FV1000  
522 laser scanning confocal microscope (Olympus America, Lake Success, NY). Images were  
523 acquired using FV10-ASW 2.1 software (Olympus, Waltham, MA, USA). Composite z-stack  
524 images were analyzed using the Fiji ImageJ software<sup>100</sup>. To calculate the number of pH3 positive  
525 cells within the wing pouch area of the wing discs, we used the AnalyzeParticles function in  
526 ImageJ, while manual counting was used to quantify Dcp1 positive cells. We note that cell



527 proliferation and apoptosis staining for *NCBP2/Cbp20*, *DLG1/dlg1*, *BDH1/CG8888*, and  
528 *FBXO45/Fsn* were previously published<sup>42</sup>.

529

### 530 **Statistical analysis**

531 Significance for the wing area and vein length measurements, cell counts for proliferation and  
532 apoptosis, and *Flynotyper* scores were compared to appropriate GD or KK controls using one-  
533 tailed or two-tailed Mann-Whitney tests. P-values for each set of experiments were corrected for  
534 multiple testing using Benjamini-Hochberg correction. All statistical and clustering analysis was  
535 performed using R v.3.6.1 (R Center for Statistical Computing, Vienna, Austria). Details for the  
536 statistical tests performed for each dataset are provided in **Supp. Data 10**.

537

### 538 **Expression data analysis**

539 We obtained tissue-specific expression data for fly homologs of CNV genes from the FlyAtlas  
540 Anatomical Microarray dataset<sup>62</sup>. Raw FPKM (fragments per kilobase of transcript per million  
541 reads) expression values for each tissue were categorized as follows: <10, no expression; 10-100,  
542 low expression; 100-500, moderate expression; 500-1000, high expression; and >1000, very high  
543 expression (**Supp. Data 6**). The median expression among midgut, hindgut, Malpighian tube,  
544 and (for adult only) crop tissues was used to represent the overall gut expression. We similarly  
545 obtained human tissue-specific expression data for CNV genes from the GTEx Consortium v.1.2  
546 RNA-Seq datasets<sup>64</sup>. Median TPM (transcripts per million reads) expression values for each  
547 tissue were categorized as follows: <3, no expression; 3-10, low expression; 10-25, moderate  
548 expression; 25-100, high expression; and >100, very high expression (**Supp. Data 6**). The  
549 median expression among all brain and heart sub-tissues was used to represent brain and heart

550 expression, while the median expression among all colon, esophagus, small intestine, and  
551 stomach sub-tissues was used to represent digestive tract expression. Preferential gene  
552 expression for a particular tissue within the GTEx dataset was determined if the expression  
553 values for that tissue were greater than the third quartile of all tissue expression values for that  
554 gene, plus 1.5 times the interquartile range. Venn diagrams were generated using the Venny  
555 webtool (<http://bioinfogp.cnb.csic.es/tools/venny>) (Supp. Fig. 3).

556

### 557 **Network analysis**

558 We obtained human tissue-specific gene interaction networks for brain, heart, and kidney tissues  
559 from the GIANT network database<sup>80</sup> within HumanBase (<https://hb.flatironinstitute.org>). These  
560 networks were built by training a Bayesian classifier based on tissue-specific gene co-expression  
561 datasets, which then assigned a posterior probability for interactions between each pair of genes  
562 within the genome for a particular tissue. We downloaded the “Top edge” version of each tissue-  
563 specific network, and extracted all gene pairs with posterior probabilities >0.2 to create sub-  
564 networks containing the top ~0.5% tissue-specific interactions. Next, we identified the shortest  
565 paths in each sub-network between human CNV genes whose fly homologs disrupted signaling  
566 pathways in the larval wing disc and human genes within each disrupted pathway, using the  
567 inverse of the posterior probability as weights for each edge in the network. Gene sets from the  
568 human Notch (KEGG:map04330), Wnt (KEGG:map04310) and Hedgehog pathways  
569 (KEGG:map04340) were curated from the Kyoto Encyclopedia of Genes and Genomes (KEGG)  
570 pathway database<sup>101</sup>. Using the NetworkX Python package<sup>102</sup>, we calculated the shortest distance  
571 between each CNV gene and pathway gene, and identified connecting genes that were within  
572 each of the shortest paths for the three tissue-specific networks. We further tested for enrichment

573 of Gene Ontology (GO) terms (PantherDB GO-Slim) among the connector genes using the  
574 PantherDB Gene List Analysis tool<sup>103</sup>. Lists of the shortest paths and connector genes in each  
575 tissue-specific network, as well as enriched GO terms for sets of connector genes, are provided  
576 in **Supp. Data 8**. Gene networks were visualized using Cytoscape v.3.7.2<sup>104</sup> using an edge-  
577 weighted spring embedded layout.

578

### 579 **Mouse and human phenotypic data analysis**

580 Phenotypic data for mouse models of CNV gene homologs, categorized using top-level  
581 Mammalian Phenotype Ontology terms, were obtained from the Mouse Genome Informatics  
582 (MGI) database<sup>81</sup> (**Supp. Data 4**). Phenotypic data for human carriers of pathogenic CNVs were  
583 obtained from the DECIPHER public database<sup>9</sup>. Clinical phenotypes for each CNV carrier were  
584 categorized by top-level Human Phenotype Ontology terms<sup>105</sup> using the Orange3 Bioinformatics  
585 software library (<https://orange-bioinformatics.readthedocs.io>), and the frequency of individuals  
586 carrying each top-level phenotype term was calculated for each of the ten tested pathogenic  
587 CNVs.

588

589 **DATA AVAILABILITY**

590 All data supporting the findings of this study are available within the paper and its  
591 supplementary information files.

592

593 **CODE AVAILABILITY**

594 All source code for data analysis in this manuscript, including scripts for k-means clustering of  
595 fly phenotypes, network connectivity of CNV and developmental pathway genes, and extraction  
596 of top-level human phenotype terms, are available on the Girirajan lab GitHub page at  
597 [https://github.com/girirajanlab/CNV\\_wing\\_project](https://github.com/girirajanlab/CNV_wing_project).

598

599 **ACKNOWLEDGEMENTS**

600 The authors thank members of the Girirajan Lab for their helpful discussions and comments on  
601 the manuscript. This study makes use of data generated by the DECIPHER community. A full  
602 list of centers who contributed to the generation of the data is available from  
603 <http://decipher.sanger.ac.uk> and via email from [decipher@sanger.ac.uk](mailto:decipher@sanger.ac.uk). Funding for the project  
604 was provided by the Wellcome Trust. This work was supported by NIH R01-GM121907 and  
605 resources from the Huck Institutes of the Life Sciences to S.G., and NIH T32-GM102057 to M.J.

606

607 **CONTRIBUTIONS**

608 T.Y., M.J., S.Y., and S.G. designed the study. T.Y., S.Y., L.P., S.K., D.J.G., A.S., Y.M., J.I., and  
609 Z.C.L. performed the functional experiments. T.Y. and M.J. performed the expression and  
610 network experiments. T.Y., M.J., and S.G. analyzed the data and wrote the manuscript with input  
611 from all authors.

612 **COMPETING OF INTERESTS**

613 The authors declare that they have no competing interests.

614 **REFERENCES**

- 615
- 616 1. Girirajan, S., Campbell, C. D. & Eichler, E. E. Human Copy Number Variation and  
617 Complex Genetic Disease. *Annu. Rev. Genet.* **45**, 203–226 (2011).
  - 618 2. Malhotra, D. & Sebat, J. CNVs: harbingers of a rare variant revolution in psychiatric  
619 genetics. *Cell* **148**, 1223–1241 (2012).
  - 620 3. Cooper, G. M. *et al.* A copy number variation morbidity map of developmental delay. *Nat.*  
621 *Genet.* **43**, 838–846 (2011).
  - 622 4. Zhang, F., Gu, W., Hurles, M. E. & Lupski, J. R. Copy Number Variation in Human  
623 Health, Disease, and Evolution. *Annu. Rev. Genomics Hum. Genet.* **10**, 451–481 (2009).
  - 624 5. Greenway, S. C. *et al.* De novo copy number variants identify new genes and loci in  
625 isolated sporadic tetralogy of Fallot. *Nat. Genet.* **41**, 931–935 (2009).
  - 626 6. Glessner, J.T. *et al.* Increased Frequency of De Novo Copy Number Variations in  
627 Congenital Heart Disease by Integrative Analysis of SNP Array and Exome Sequence  
628 Data. *Circ Res.* **115**, 884–896 (2014).
  - 629 7. Sanna-Cherchi, S. *et al.* Copy-number disorders are a common cause of congenital kidney  
630 malformations. *Am. J. Hum. Genet.* **91**, 987–997 (2012).
  - 631 8. Zahnleiter, D. *et al.* Rare copy number variants are a common cause of short stature. *PLoS*  
632 *Genet.* **9**, e1003365 (2013).
  - 633 9. Firth, H. V. *et al.* DECIPHER: Database of Chromosomal Imbalance and Phenotype in  
634 Humans Using Ensembl Resources. *Am. J. Hum. Genet.* **84**, 524–533 (2009).
  - 635 10. Mefford, H. C. *et al.* Recurrent rearrangements of chromosome 1q21.1 and variable  
636 pediatric phenotypes. *N. Engl. J. Med.* **359**, 1685–99 (2008).
  - 637 11. Brunetti-Pierrri, N. *et al.* Recurrent reciprocal 1q21.1 deletions and duplications associated  
638 with microcephaly or macrocephaly and developmental and behavioral abnormalities. *Nat.*  
639 *Genet.* **40**, 1466–1471 (2008).
  - 640 12. Christiansen, J. *et al.* Chromosome 1q21.1 contiguous gene deletion is associated with  
641 congenital heart disease. *Circ. Res.* **94**, 1429–35 (2004).
  - 642 13. Pober, B. R. Williams-Beuren syndrome. *N. Engl. J. Med.* **362**, 239–52 (2010).
  - 643 14. Ewart, A. K. *et al.* A human vascular disorder, supravalvular aortic stenosis, maps to  
644 chromosome 7. *Proc. Natl. Acad. Sci. U. S. A.* **90**, 3226–30 (1993).
  - 645 15. Romeo, S. *et al.* Search for genetic variants of the SYNTAXIN 1A (STX1A) gene: The -  
646 352 A>T variant in the STX1A promoter associates with impaired glucose metabolism in  
647 an Italian obese population. *Int. J. Obes.* **32**, 413–420 (2008).
  - 648 16. Frangiskakis, J. M. *et al.* LIM-kinase1 hemizyosity implicated in impaired visuospatial  
649 constructive cognition. *Cell* **86**, 59–69 (1996).
  - 650 17. Tassabehji, M. *et al.* GTF2IRD1 in craniofacial development of humans mice. *Science*  
651 **310**, 1184–1187 (2005).
  - 652 18. Lindsay, E. A. *et al.* Tbx1 haploinsufficiency in the DiGeorge syndrome region causes  
653 aortic arch defects in mice. *Nature* **410**, 97–101 (2001).
  - 654 19. Mefford, H. C. *et al.* Recurrent reciprocal genomic rearrangements of 17q12 are  
655 associated with renal disease, diabetes, and epilepsy. *Am. J. Hum. Genet.* **81**, 1057–1069  
656 (2007).
  - 657 20. Clissold, R. L. *et al.* Chromosome 17q12 microdeletions but not intragenic HNF1B  
658 mutations link developmental kidney disease and psychiatric disorder. *Kidney Int.* **90**,  
659 203–11 (2016).

- 660 21. Weiss, L. A. *et al.* Association between Microdeletion and Microduplication at 16p11.2  
661 and Autism. *N. Engl. J. Med.* **358**, 667–675 (2008).
- 662 22. Girirajan, S. *et al.* Phenotypic Heterogeneity of Genomic Disorders and Rare Copy-  
663 Number Variants. *N. Engl. J. Med.* **367**, 1321–1331 (2012).
- 664 23. Bernier, R. *et al.* Disruptive CHD8 Mutations Define a Subtype of Autism Early in  
665 Development. *Cell* **158**, 263–276 (2014).
- 666 24. Ostergaard, P. *et al.* Mutations in KIF11 cause autosomal-dominant microcephaly variably  
667 associated with congenital lymphedema and chorioretinopathy. *Am. J. Hum. Genet.* **90**,  
668 356–62 (2012).
- 669 25. Horev, G. *et al.* Dosage-dependent phenotypes in models of 16p11.2 lesions found in  
670 autism. *Proc. Natl. Acad. Sci.* **108**, 17076–17081 (2011).
- 671 26. Pucilowska, J. *et al.* The 16p11.2 Deletion Mouse Model of Autism Exhibits Altered  
672 Cortical Progenitor Proliferation and Brain Cytoarchitecture Linked to the ERK MAPK  
673 Pathway. *J. Neurosci.* **35**, 3190–3200 (2015).
- 674 27. Portmann, T. *et al.* Behavioral abnormalities and circuit defects in the basal ganglia of a  
675 mouse model of 16p11.2 deletion syndrome. *Cell Rep.* **7**, 1077–1092 (2014).
- 676 28. Rutkowski, T. P. *et al.* Behavioral changes and growth deficits in a CRISPR engineered  
677 mouse model of the schizophrenia-associated 3q29 deletion. *Mol. Psychiatry* (2019)  
678 doi:10.1038/s41380-019-0413-5.
- 679 29. Baba, M. *et al.* Psychiatric-disorder-related behavioral phenotypes and cortical  
680 hyperactivity in a mouse model of 3q29 deletion syndrome. *Neuropsychopharmacology*  
681 **44**, 2125–2135 (2019).
- 682 30. Arbogast, T. *et al.* Reciprocal Effects on Neurocognitive and Metabolic Phenotypes in  
683 Mouse Models of 16p11.2 Deletion and Duplication Syndromes. *PLoS Genet.* **12**,  
684 e1005709 (2016).
- 685 31. Haller, M., Au, J., O’Neill, M. & Lamb, D. J. 16p11.2 transcription factor MAZ is a  
686 dosage-sensitive regulator of genitourinary development. *Proc. Natl. Acad. Sci.* **115**,  
687 E1849–E1858 (2018).
- 688 32. Yadav, S. *et al.* TAOK2 Kinase Mediates PSD95 Stability and Dendritic Spine Maturation  
689 through Septin7 Phosphorylation. *Neuron* **93**, 379–393 (2017).
- 690 33. Richter, M. *et al.* Altered TAOK2 activity causes autism-related neurodevelopmental and  
691 cognitive abnormalities through RhoA signaling. *Mol. Psychiatry* **24**, 1329–1350 (2019).
- 692 34. Golzio, C. *et al.* KCTD13 is a major driver of mirrored neuroanatomical phenotypes of the  
693 16p11.2 copy number variant. *Nature* **485**, 363–367 (2012).
- 694 35. Escamilla, C. O. *et al.* Kctd13 deletion reduces synaptic transmission via increased RhoA.  
695 *Nature* **551**, 227–231 (2017).
- 696 36. Ip, J. P. K. *et al.* Major vault protein, a candidate gene in 16p11.2 microdeletion  
697 syndrome, is required for the homeostatic regulation of visual cortical plasticity. *J.*  
698 *Neurosci.* **38**, 2017–2034 (2018).
- 699 37. Dickinson, M. E. *et al.* High-throughput discovery of novel developmental phenotypes.  
700 *Nature* **537**, 508–514 (2016).
- 701 38. Wangler, M. F., Yamamoto, S. & Bellen, H. J. Fruit flies in biomedical research. *Genetics*  
702 **199**, 639–653 (2015).
- 703 39. Chien, S. Homophila: human disease gene cognates in *Drosophila*. *Nucleic Acids Res.* **30**,  
704 149–151 (2002).
- 705 40. Reiter, L. T., Potocki, L., Chien, S., Gribskov, M. & Bier, E. A systematic analysis of



- 706 human disease-associated gene sequences in *Drosophila melanogaster*. *Genome Res.* **11**,  
707 1114–1125 (2001).
- 708 41. Iyer, J. *et al.* Pervasive genetic interactions modulate neurodevelopmental defects of the  
709 autism-associated 16p11.2 deletion in *Drosophila melanogaster*. *Nat. Commun.* **9**, 2548  
710 (2018).
- 711 42. Singh, M. D. *et al.* NCBP2 modulates neurodevelopmental defects of the 3q29 deletion in  
712 *Drosophila* and *X. laevis* models. *bioRxiv* 614750 (2019) doi:10.1101/614750.
- 713 43. Molnar, C. *et al.* Signalling Pathways in Development and Human Disease: A *Drosophila*  
714 Wing Perspective. in *Human Genetic Diseases* (InTech, 2011). doi:10.5772/23858.
- 715 44. Dworkin, I. & Gibson, G. Epidermal growth factor receptor and transforming growth  
716 factor- $\beta$  signaling contributes to variation for wing shape in *Drosophila melanogaster*.  
717 *Genetics* **173**, 1417–1431 (2006).
- 718 45. Testa, N. D. & Dworkin, I. The sex-limited effects of mutations in the EGFR and TGF- $\beta$   
719 signaling pathways on shape and size sexual dimorphism and allometry in the *Drosophila*  
720 wing. *Dev. Genes Evol.* **226**, 159–171 (2016).
- 721 46. Yan, S. J., Gu, Y., Li, W. X. & Fleming, R. J. Multiple signaling pathways and a selector  
722 protein sequentially regulate *Drosophila* wing development. *Development* **131**, 285–298  
723 (2004).
- 724 47. Strigini, M. & Cohen, S. M. A Hedgehog activity gradient contributes to AP axial  
725 patterning of the *Drosophila* wing. *Development* **124**, 4697–4705 (1997).
- 726 48. Diaz de la Loza, M. C. & Thompson, B. J. Forces shaping the *Drosophila* wing. *Mech.*  
727 *Dev.* **144**, 23–32 (2017).
- 728 49. Bier, E. *Drosophila*, the golden bug, emerges as a tool for human genetics. *Nat. Rev.*  
729 *Genet.* **6**, 9–23 (2005).
- 730 50. Wu, Y. *et al.* A *Drosophila* model for Angelman syndrome. *Proc. Natl. Acad. Sci.* **105**,  
731 12399–12404 (2008).
- 732 51. Yamamoto, S. *et al.* A *Drosophila* genetic resource of mutants to study mechanisms  
733 underlying human genetic diseases. *Cell* **159**, 200–214 (2014).
- 734 52. Kochinke, K. *et al.* Systematic Phenomics Analysis Deconvolutes Genes Mutated in  
735 Intellectual Disability into Biologically Coherent Modules. *Am. J. Hum. Genet.* **98**, 149–  
736 164 (2016).
- 737 53. Hu, Y. *et al.* An integrative approach to ortholog prediction for disease-focused and other  
738 functional studies. *BMC Bioinformatics* **12**, 357 (2011).
- 739 54. Capdevila, J. & Guerrero, I. Targeted expression of the signaling molecule  
740 decapentaplegic induces pattern duplications and growth alterations in *Drosophila* wings.  
741 *EMBO J.* **13**, 4459–4468 (1994).
- 742 55. Lindström, R., Lindholm, P., Palgi, M., Saarma, M. & Heino, T. I. In vivo screening  
743 reveals interactions between *Drosophila* Manf and genes involved in the mitochondria and  
744 the ubiquinone synthesis pathway. *BMC Genet.* **18**, 52 (2017).
- 745 56. Nielsen, J. *et al.* A mouse model of the schizophrenia-associated 1q21.1 microdeletion  
746 syndrome exhibits altered mesolimbic dopamine transmission. *Transl. Psychiatry* **7**, 1261  
747 (2017).
- 748 57. Huang, H. *et al.* PTEN affects cell size, cell proliferation and apoptosis during *Drosophila*  
749 eye development. *Development* **126**, 5365–5372 (1999).
- 750 58. Toyo-oka, K. *et al.* Protein phosphatase 4 catalytic subunit regulates Cdk1 activity and  
751 microtubule organization via NDEL1 dephosphorylation. *J. Cell Biol.* **180**, 1133–1147



- 752 (2008).
- 753 59. Ohsugi, M. *et al.* Kid-Mediated Chromosome Compaction Ensures Proper Nuclear  
754 Envelope Formation. *Cell* **132**, 771–782 (2008).
- 755 60. Iyer, J. *et al.* Quantitative assessment of eye phenotypes for functional genetic studies  
756 using *Drosophila melanogaster*. *G3 Genes, Genomes, Genet.* **6**, 1427–1437 (2016).
- 757 61. Rosenberg, M. J. *et al.* Mutant deoxynucleotide carrier is associated with congenital  
758 microcephaly. *Nat. Genet.* **32**, 175–179 (2002).
- 759 62. Chintapalli, V. R., Wang, J. & Dow, J. A. T. Using FlyAtlas to identify better *Drosophila*  
760 *melanogaster* models of human disease. *Nat. Genet.* **39**, 715–720 (2007).
- 761 63. Claes, L. *et al.* De novo mutations in the sodium-channel gene SCN1A cause severe  
762 myoclonic epilepsy of infancy. *Am. J. Hum. Genet.* **68**, 1327–1332 (2001).
- 763 64. Ardlie, K. G. *et al.* The Genotype-Tissue Expression (GTEx) pilot analysis: Multitissue  
764 gene regulation in humans. *Science* **348**, 648–660 (2015).
- 765 65. Ernst, C. Proliferation and Differentiation Deficits are a Major Convergence Point for  
766 Neurodevelopmental Disorders. *Trends Neurosci.* **39**, 290–299 (2016).
- 767 66. Marchetto, M. C. *et al.* Altered proliferation and networks in neural cells derived from  
768 idiopathic autistic individuals. *Mol. Psychiatry* **22**, 820–835 (2017).
- 769 67. Wei, H., Alberts, I. & Li, X. The apoptotic perspective of autism. *Int. J. Dev. Neurosci.*  
770 **36**, 13–18 (2014).
- 771 68. Hartl, T. A. & Scott, M. P. Wing tips: The wing disc as a platform for studying Hedgehog  
772 signaling. *Methods* **68**, 199–206 (2014).
- 773 69. de Celis, J. F. & García-Bellido, A. Roles of the Notch gene in *Drosophila* wing  
774 morphogenesis. *Mech. Dev.* **46**, 109–122 (1994).
- 775 70. Raftery, L. A. & Umulis, D. M. Regulation of BMP activity and range in *Drosophila* wing  
776 development. *Curr. Opin. Cell Biol.* **24**, 158–65 (2012).
- 777 71. Diaz-Benjumea, F. J. & Cohen, S. M. Serrate signals through Notch to establish a  
778 Wingless-dependent organizer at the dorsal/ventral compartment boundary of the  
779 *Drosophila* wing. *Development* **121**, 4215–4225 (1995).
- 780 72. Becam, I. & Milán, M. A permissive role of Notch in maintaining the DV affinity  
781 boundary of the *Drosophila* wing. *Dev. Biol.* **322**, 190–8 (2008).
- 782 73. Zecca, M., Basler, K. & Struhl, G. Sequential organizing activities of engrailed, hedgehog  
783 and decapentaplegic in the *Drosophila* wing. *Development* **121**, 2265–2278 (1995).
- 784 74. Tabata, T. & Kornberg, T. B. Hedgehog is a signaling protein with a key role in patterning  
785 *Drosophila* imaginal discs. *Cell* **76**, 89–102 (1994).
- 786 75. O’Roak, B. J. *et al.* Sporadic autism exomes reveal a highly interconnected protein  
787 network of de novo mutations. *Nature* **485**, 246–250 (2012).
- 788 76. Hahn, H. *et al.* Mutations of the human homolog of *Drosophila* patched in the nevoid  
789 basal cell carcinoma syndrome. *Cell* **85**, 841–851 (1996).
- 790 77. Johnson, R. L. *et al.* Human homolog of patched, a candidate gene for the basal cell nevus  
791 syndrome. *Science* **272**, 1668–1671 (1996).
- 792 78. Swarup, S., Pradhan-Sundd, T. & Verheyen, E. M. Genome-wide identification of  
793 phospho-regulators of Wnt signaling in *Drosophila*. *Development* **142**, 1502–1515 (2015).
- 794 79. Six, E. M. *et al.* The Notch ligand Delta1 recruits Dlg1 at cell-cell contacts and regulates  
795 cell migration. *J. Biol. Chem.* **279**, 55818–55826 (2004).
- 796 80. Greene, C. S. *et al.* Understanding multicellular function and disease with human tissue-  
797 specific networks. *Nat. Genet.* **47**, 569–576 (2015).

- 798 81. Bult, C. J. *et al.* Mouse Genome Database (MGD) 2019. *Nucleic Acids Res.* **47**, D801–  
799 D806 (2019).
- 800 82. Zhou, W. *et al.* GluR1 controls dendrite growth through its binding partner, SAP97. *J.*  
801 *Neurosci.* **28**, 10220–10233 (2008).
- 802 83. Iizuka-Kogo, A., Ishidao, T., Akiyama, T. & Senda, T. Abnormal development of  
803 urogenital organs in Dlg1-deficient mice. *Development* **134**, 1799–1807 (2007).
- 804 84. Mahoney, Z. X. *et al.* Discs-large homolog 1 regulates smooth muscle orientation in the  
805 mouse ureter. *Proc. Natl. Acad. Sci.* **103**, 19872–19877 (2006).
- 806 85. Caruana, G. & Bernstein, A. Craniofacial dysmorphogenesis including cleft palate in mice  
807 with an insertional mutation in the discs large gene. *Mol. Cell. Biol.* **21**, 1475–83 (2001).
- 808 86. Chapman, D. L. & Papaioannou, V. E. Three neural tubes in mouse embryos with  
809 mutations in the T-box gene Tbx6. *Nature* **391**, 695–697 (1998).
- 810 87. Ashburner, M. *et al.* Gene ontology: Tool for the unification of biology. *Nat. Genet.* **25**,  
811 25–29 (2000).
- 812 88. The Gene Ontology Consortium. The Gene Ontology Resource: 20 years and still GOing  
813 strong. *Nucleic Acids Res.* **47**, D330–D338 (2019).
- 814 89. Pabis, M., Neufeld, N., Shav-Tal, Y. & Neugebauer, K. M. Binding properties and  
815 dynamic localization of an alternative isoform of the cap-binding complex subunit CBP20.  
816 *Nucleus* **1**, 412–421 (2010).
- 817 90. Di Padova, M. *et al.* Che-1 arrests human colon carcinoma cell proliferation by displacing  
818 HDAC1 from the p21WAF1/CIP1 promoter. *J. Biol. Chem.* **278**, 36496–504 (2003).
- 819 91. Bruno, T. *et al.* Che-1 affects cell growth by interfering with the recruitment of HDAC1  
820 by Rb. *Cancer Cell* **2**, 387–399 (2002).
- 821 92. Page, G., Lödige, I., Kögel, D. & Scheidtmann, K. H. AATF, a novel transcription factor  
822 that interacts with Dlk/ZIP kinase and interferes with apoptosis. *FEBS Lett.* **462**, 187–91  
823 (1999).
- 824 93. Sumiyoshi, E., Sugimoto, A. & Yamamoto, M. Protein phosphatase 4 is required for  
825 centrosome maturation in mitosis and sperm meiosis in *C. elegans*. *J. Cell Sci.* **115**, 1403–  
826 1410 (2002).
- 827 94. Jensen, M. & Girirajan, S. An interaction-based model for neuropsychiatric features of  
828 copy-number variants. *PLoS Genet.* **15**, e1007879 (2019).
- 829 95. Coe, B. P., Girirajan, S. & Eichler, E. E. A genetic model for neurodevelopmental disease.  
830 *Curr. Opin. Neurobiol.* **22**, 829–836 (2012).
- 831 96. Nicholas, A. K. *et al.* The molecular landscape of ASPM mutations in primary  
832 microcephaly. *J. Med. Genet.* **46**, 249–253 (2009).
- 833 97. Brand, A. H. & Perrimon, N. Targeted gene expression as a means of altering cell fates  
834 and generating dominant phenotypes. *Development* **118**, 401–15 (1993).
- 835 98. Green, E. W., Fedele, G., Giorgini, F. & Kyriacou, C. P. A Drosophila RNAi collection is  
836 subject to dominant phenotypic effects. *Nat. Methods* **11**, 222–223 (2014).
- 837 99. Vissers, J. H. A., Manning, S. A., Kulkarni, A. & Harvey, K. F. A Drosophila RNAi  
838 library modulates Hippo pathway-dependent tissue growth. *Nat. Commun.* **7**, 10368  
839 (2016).
- 840 100. Schindelin, J. *et al.* Fiji: An open-source platform for biological-image analysis. *Nat.*  
841 *Methods* **9**, 676–682 (2012).
- 842 101. Kanehisa, M., Sato, Y., Furumichi, M., Morishima, K. & Tanabe, M. New approach for  
843 understanding genome variations in KEGG. *Nucleic Acids Res.* **47**, D590–D595 (2019).

- 844 102. Hagberg, A. A., Schult, D. A. & Swart, P. J. Exploring network structure, dynamics, and  
845 function using NetworkX. in *7th Python in Science Conference (SciPy 2008)* 11–15  
846 (2008).
- 847 103. Mi, H. *et al.* PANTHER version 11: Expanded annotation data from Gene Ontology and  
848 Reactome pathways, and data analysis tool enhancements. *Nucleic Acids Res.* **45**, D183–  
849 D189 (2017).
- 850 104. Shannon, P. *et al.* Cytoscape: A software Environment for integrated models of  
851 biomolecular interaction networks. *Genome Res.* **13**, 2498–2504 (2003).
- 852 105. Köhler, S. *et al.* Expansion of the Human Phenotype Ontology (HPO) knowledge base and  
853 resources. *Nucleic Acids Res.* **47**, D1018–D1027 (2019).  
854

855 **FIGURE LEGENDS**

856 **Figure 1. Phenotypic expression of CNV carriers across tissues.** Heatmap with frequencies of  
857 non-neuronal developmental phenotypes observed in 1,225 human carriers of 10 pathogenic  
858 CNV deletions, curated from the DECIPHER database, is shown. CNV carriers show a variety of  
859 phenotypes that manifest across different tissues, including eye, limbs, muscle, and skeleton.

860

861 **Figure 2. Targeted analysis to identify global developmental phenotypes with knockdown**  
862 **of homologs of CNV genes. (A)** Strategy for identifying non-neuronal phenotypes and  
863 underlying cellular mechanisms for homologs of CNV and known neurodevelopmental genes  
864 using the fly wing as a model system. We evaluated 59 *Drosophila* homologs of genes within 10  
865 CNV regions and 20 known neurodevelopmental genes (79 total homologs). Using the *UAS-*  
866 *GAL4* system with wing-specific *bx<sup>MS1096</sup>* driver, we knocked down 136 individual RNAi lines  
867 for the CNV and neurodevelopmental homologs, and evaluated qualitative and quantitative  
868 phenotypes. We next clustered RNAi lines based on severity of qualitative phenotypes, and  
869 compared adult wing phenotypes to phenotypes observed with ubiquitous and eye-specific  
870 knockdown of homologs. Furthermore, we evaluated underlying cellular mechanisms for the  
871 observed wing-specific phenotypes, and examined the connectivity patterns of candidate  
872 homologs for developmental phenotypes in multiple human tissue-specific networks. **(B)**  
873 Representative brightfield images of adult wing phenotype severity observed with knockdown of  
874 homologs of CNV genes, based on clustering analysis, are shown. **(C)** Heatmap with k-means  
875 clustering of qualitative phenotypes in adult female wings across 136 RNAi lines is shown. The  
876 color of each cell represents the frequency of individual fly wings (n=20-25 adult wings) for  
877 each RNAi line (x-axis) that show a specific severity (no phenotype, mild, moderate, severe,

878 lethal) for the five qualitative phenotypes assessed (y-axis; wrinkled wings, ectopic veins,  
879 missing veins, discoloration, bristle planar polarity), as detailed in **Supp. Data 2**. Based on these  
880 data, we identified clusters for no phenotype (n=75 lines), mild (n=24 lines), moderate (n=10  
881 lines), severe (n=21 lines), and lethal (n=6 lines). **(D)** Summary table of qualitative and  
882 quantitative adult wing phenotypes for all tested RNAi lines of homologs of CNV and  
883 neurodevelopmental genes. Quantitative phenotype totals do not include lethal RNAi lines for  
884 both area and vein length. In addition, L3 vein length totals do not include severe RNAi lines.  
885

886 **Figure 3. Qualitative adult wing phenotypes of *Drosophila* homologs of CNV and**  
887 **neurodevelopmental genes.** Heatmaps representing the five qualitative adult wing phenotypes  
888 for all 136 RNAi lines, with **(A)** all 59 tested homologs for 10 CNV regions and **(B)** 20  
889 homologs for neurodevelopmental genes ( $\beta$ -catenin, core neurodevelopmental genes, and  
890 microcephaly genes), are shown. The color of each cell represents the frequency of each of the  
891 five qualitative phenotypes by severity (wrinkled wings, WR; ectopic veins, EV; missing veins,  
892 MV; discoloration, DC; bristle planar polarity, BP), ranging from no phenotype to lethal. **(C)**  
893 Representative brightfield images of adult fly wings (scale bar = 500 $\mu$ m) with wing-specific  
894 knockdown of homologs of CNV and neurodevelopmental genes showing the five assessed  
895 qualitative phenotypes, including discoloration, wrinkled wings, bristle polarity, ectopic veins,  
896 and missing veins are shown. The panels in the  $bx^{MS1096}$ -*GAL4* control and  $C6836^{KK112485}$  images  
897 highlight bristle planar polarity phenotypes for the representative images. Black arrowheads  
898 highlight ectopic veins and white arrowheads highlight missing veins. Genotypes for the images  
899 are:  $w^{1118}/bx^{MS1096}$ -*GAL4*;+; *UAS-Dicer2*/+,  $w^{1118}/bx^{MS1096}$ -*GAL4*; *UAS-Rph*<sup>GD7330</sup> RNAi/+; *UAS-*  
900 *Dicer2*/+,  $w^{1118}/bx^{MS1096}$ -*GAL4*; *UAS-CG15528*<sup>KK107736</sup> RNAi/+; *UAS-Dicer2*/+,  $w^{1118}/bx^{MS1096}$ -

901 *GAL4;UAS-CG6836<sup>KK112485</sup> RNAi/+; UAS-Dicer2/+*, *w<sup>1118</sup>/bx<sup>MS1096</sup>-GAL4;+;UAS-*  
902 *CG14182<sup>GD2738</sup> RNAi/UAS-Dicer2*, and *w<sup>1118</sup>/bx<sup>MS1096</sup>-GAL4;UAS-kis<sup>KK100890</sup> RNAi/+; UAS-*  
903 *Dicer2/+*.

904

905 **Figure 4. Quantitative adult wing phenotypes of *Drosophila* homologs of CNV and**

906 **neurodevelopmental genes. (A)** Representative brightfield images of adult fly wings (scale bar

907 = 500µm) with wing-specific knockdown of homologs of CNV and neurodevelopmental genes

908 with size defects are shown. The *bx<sup>MS1096</sup>-GAL4* control image highlights the six veins, including

909 longitudinal veins L2, L3, L4, and L5 as well as the anterior and posterior crossveins (ACV and

910 PCV), that were measured for quantitative analysis. The dotted line in the control image

911 represents the total wing area calculated for each RNAi line. Genotypes for the images are:

912 *w<sup>1118</sup>/bx<sup>MS1096</sup>-GAL4;+; UAS-Dicer2/+*, *w<sup>1118</sup>/bx<sup>MS1096</sup>-GAL4;UAS-Fmo-2<sup>KK109203</sup> RNAi/+; UAS-*

913 *Dicer2/+*, and *w<sup>1118</sup>/bx<sup>MS1096</sup>-GAL4;+;UAS-Trpm<sup>GD4541</sup> RNAi/UAS-Dicer2*. **(B)** Boxplot of L3

914 vein lengths for knockdown of select homologs in adult fly wings (n = 9-91, \*p < 0.05, two-

915 tailed Mann–Whitney test with Benjamini-Hochberg correction). Vein measurements for all

916 other longitudinal veins and crossveins (ACV and PCV) for these lines are represented in **Supp**

917 **Fig. 2. (C)** Boxplot of wing areas for knockdown of select homologs in adult fly wings (n = 9-

918 91, \*p < 0.05, two-tailed Mann–Whitney test with Benjamini-Hochberg correction). All boxplots

919 indicate median (center line), 25th and 75th percentiles (bounds of box), and minimum and

920 maximum (whiskers), with red dotted lines representing the control median.

921

922 **Figure 5. Comparison of wing-specific, eye-specific, and ubiquitous knockdown of**

923 **homologs of CNV and known neurodevelopmental genes. (A)** Heatmap with the penetrance

924 of phenotypes with ubiquitous knockdown (*da-GAL4*) of select homologs of CNV genes,  
925 compared to their adult wing-specific (*bx<sup>MS1096</sup>-GAL4*) phenotypic severity is shown. **(B)**  
926 Boxplots of *Flynotyper*-derived phenotypic scores for adult eyes with eye-specific knockdown  
927 (*GMR-GAL4*) of select homologs of CNV and neurodevelopmental genes, normalized as fold-  
928 change (FC) to control values (n = 7–40, \*p < 0.05, one-tailed Mann–Whitney test with  
929 Benjamini-Hochberg correction). The boxplots are arranged by severity of adult wing  
930 phenotypes observed for each RNAi line, while the *Flynotyper* phenotypic scores are categorized  
931 into four severity categories: no change (0–1.1 FC), mild (1.1–1.5 FC), moderate (1.5–2.0 FC),  
932 and severe (>2.0 FC). **(C)** Boxplot showing the average eye phenotypic scores for 66 RNAi lines  
933 of select homologs of CNV and neurodevelopmental genes, normalized as fold-change (FC) to  
934 control values, by wing phenotypic category (n=4–30 RNAi lines per group). We did not observe  
935 any significant changes in eye phenotype severity across the five wing phenotypic categories  
936 (Kruskal-Wallis rank sum test, p=0.567, df = 5,  $\chi^2 = 3.881$ ). Examples of average eye phenotypic  
937 scores for RNAi lines with no phenotype (*para<sup>GD3392-1</sup>*), mild (*rl<sup>KK115768</sup>*), and lethal (*dlg1<sup>GD4689</sup>*)  
938 wing phenotype severity are highlighted in the graph. All boxplots indicate median (center line),  
939 25th and 75th percentiles (bounds of box), and minimum and maximum (whiskers), with red  
940 dotted lines representing the control median. **(D)** Representative brightfield adult eye (scale  
941 bar = 100  $\mu$ m) and adult wing (scale bar = 500 $\mu$ m) images with tissue-specific knockdown of  
942 homologs of CNV genes are shown. Genotypes for the eye images are: *w<sup>1118</sup>;GMR-GAL4/+;*  
943 *UAS-Dicer2/+*, *w<sup>1118</sup>;GMR-GAL4/UAS-Lnk<sup>KK105731</sup> RNAi*; *UAS-Dicer2/+*, *w<sup>1118</sup>;GMR-*  
944 *GAL4/UAS-mEFTu1<sup>GD16961</sup> RNAi*; *UAS-Dicer2/+*. Genotypes for the wing images are:  
945 *w<sup>1118</sup>/bx<sup>MS1096</sup>-GAL4;+;* *UAS-Dicer2/+*, *w<sup>1118</sup>/bx<sup>MS1096</sup>-GAL4;* *UAS-Lnk<sup>KK105731</sup> RNAi/+;* *UAS-*  
946 *Dicer2/+*, and *w<sup>1118</sup>/bx<sup>MS1096</sup>-GAL4;* *UAS-mEFTu1<sup>GD16961</sup> RNAi/+;* *UAS-Dicer2/+*.



947 **Figure 6. Expression patterns of *Drosophila* homologs and human CNV and**  
948 **neurodevelopmental genes across multiple tissues. (A)** Heatmap with expression of fly  
949 homologs of select CNV and neurodevelopmental genes in multiple *Drosophila* larval and adult  
950 tissues, derived from the FlyAtlas Anatomical Microarray dataset, compared with adult wing  
951 phenotype severity, is shown. Expression values are grouped into no expression (<10 fragments  
952 per kilobase of transcript per million reads, or FPKM), low (10–100 FPKM), moderate (100–500  
953 FPKM), high (500–1000 FPKM), and very high (>1000 FPKM) expression categories. **(B)**  
954 Heatmap with expression of select human CNV and neurodevelopmental genes in multiple adult  
955 tissues, derived from the Genotype-Tissue Expression (GTEx) dataset v.1.2, is shown.  
956 Expression values are grouped into no expression (<3 transcripts per million reads, or TPM), low  
957 (3–10 TPM), moderate (10–25 TPM), high (25–100 TPM), and very high (>100 TPM)  
958 expression categories. X symbols denote preferential expression in a particular tissue (see  
959 Methods). Expression data for all CNV and neurodevelopmental genes are provided in **Supp.**  
960 **Data 6.**

961  
962 **Figure 7. *Drosophila* homologs of CNV and neurodevelopmental genes show altered levels**  
963 **of apoptosis and proliferation. (A)** Larval imaginal wing discs (scale bar = 50  $\mu$ m) stained with  
964 nuclear marker DAPI, apoptosis marker dcp1, and cell proliferation marker pH3 illustrate altered  
965 levels of apoptosis and cell proliferation due to wing-specific knockdown of select fly homologs  
966 of CNV genes. We quantified the number of stained cells within the wing pouch of the wing disc  
967 (white box), which becomes the adult wing. Additional representative images of select homologs  
968 are presented in **Supp Fig. 5**. Genotypes for the wing images are:  $w^{1118}/bx^{MS1096}-GAL4;+; UAS-$   
969  $Dicer2/+$ ,  $w^{1118}/bx^{MS1096}-GAL4;+; UAS-Aatf^{GD7229} RNAi/UAS-Dicer2$ ,  $w^{1118}/bx^{MS1096}-GAL4;UAS-$



970 *Pp4-19C<sup>GD9561</sup>/+*; *UAS-Dicer2/+*, *w<sup>1118</sup>/bx<sup>MS1096</sup>-GAL4/+*; *UAS-Atx2<sup>GD11562</sup> RNAi/UAS-Dicer2*,  
971 and *w<sup>1118</sup>/bx<sup>MS1096</sup>-GAL4/+*; *UAS-Sin<sup>GD7027</sup> RNAi/UAS-Dicer2*. **(B)** Box plot of dcp1-positive  
972 cells in larval wing discs with knockdown of select fly homologs of CNV and  
973 neurodevelopmental genes, normalized to controls (n = 7–18, \*p < 0.05, two-tailed Mann–  
974 Whitney test with Benjamini-Hochberg correction). We note that several RNAi lines showed  
975 severe dcp1 staining across the entire wing disc and could not be quantified. The number of dcp1  
976 positive cells were calculated manually. **(C)** Box plot of pH3-positive cells in the larval wing  
977 discs with knockdown of select fly homologs of CNV and neurodevelopmental genes,  
978 normalized to controls (n = 6–18, \*p < 0.05, two-tailed Mann–Whitney test with Benjamini-  
979 Hochberg correction). The number of pH3 positive cells were calculated using the  
980 AnalyzeParticles function in ImageJ. All boxplots indicate median (center line), 25th and 75th  
981 percentiles (bounds of box), and minimum and maximum (whiskers), with red dotted lines  
982 representing the control median.

983  
984 **Figure 8. Candidate *Drosophila* homologs of genes within CNV regions interact with**  
985 **conserved signaling pathways.** Larval imaginal wing discs (scale bar = 50 μm) stained with **(A)**  
986 wingless, **(B)** patched, **(C)** engrailed, and **(D)** delta illustrate disrupted expression patterns for  
987 proteins located within the Wnt (wingless), Hedgehog (patched and engrailed), and Notch (delta)  
988 signaling pathways due to wing-specific knockdown of select fly homologs of CNV and  
989 neurodevelopmental genes. Dotted yellow boxes represent expected expression patterns for  
990 signaling proteins in *bx<sup>MS1096</sup>-GAL4* control images. White arrowheads and dotted white boxes  
991 highlight disruptions in expression patterns of signaling proteins with knockdown of CNV or  
992 neurodevelopmental genes. Additional representative images of select homologs are presented in

993 **Supp Fig. 7.** Genotypes for the wing images are:  $w^{1118}/bx^{MS1096}-GAL4;+; UAS-Dicer2/+$ ,  
994  $w^{1118}/bx^{MS1096}-GAL4;UAS-Pp4-19C^{GD9561}/+; UAS-Dicer2/+$ ,  $w^{1118}/bx^{MS1096}-GAL4;UAS-$   
995  $Cbp20^{KK109448}/+; UAS-Dicer2/+$ ,  $w^{1118}/bx^{MS1096}-GAL4;+; UAS-Sin^{GD7027} RNAi/UAS-Dicer2$ ,  
996  $w^{1118}/bx^{MS1096}-GAL4;+; UAS-Aatf^{GD7229} RNAi/UAS-Dicer2$ , and  $w^{1118}/bx^{MS1096}-GAL4;UAS-$   
997  $Klp61F^{GD14149}/+; UAS-Dicer2/+$ .

998

999 **Figure 9. Connectivity of human CNV genes with conserved signaling pathway genes in**  
1000 **human tissue-specific networks. (A)** Representative diagrams of eight human CNV and  
1001 neurodevelopmental genes whose fly homologs disrupt the Notch signaling pathway and 57  
1002 human Notch signaling genes within kidney, heart, and brain-specific gene interaction networks  
1003 are shown. Yellow nodes represent CNV and neurodevelopmental genes, pink nodes represent  
1004 Notch signaling pathway genes, and green nodes represent connector genes within the shortest  
1005 paths between CNV and Notch pathway genes. **(B)** Violin plots showing the average  
1006 connectivity (i.e. inverse of shortest path lengths) of CNV genes to genes in Hedgehog, Notch,  
1007 and Wnt signaling pathways across the tested tissue-specific networks (n=322–810 pairwise  
1008 interactions, \*p < 0.05, two-tailed Welch's t-test with Benjamini-Hochberg correction). **(C)**  
1009 Table showing enriched clusters of Gene Ontology (GO) Biological Process terms for connector  
1010 genes observed for each signaling pathway in the three tested tissue-specific networks,  
1011 categorized by enrichments in ubiquitous, neuronal, and non-neuronal tissues (p<0.05, Fisher's  
1012 Exact test with Benjamini-Hochberg correction).

1013

1014 **Figure 10. A multigenic model for neuronal and non-neuronal phenotypes associated with**  
1015 **pathogenic CNVs.** Schematic of a multigenic model for neuronal and non-neuronal phenotypes

1016 associated with pathogenic CNVs. While a subset of genes within CNV regions contribute  
1017 towards tissue-specific phenotypes, a majority of genes contribute towards both neuronal and  
1018 non-neuronal phenotypes through disruption of developmental signaling pathways and global  
1019 biological processes.

Figure 1

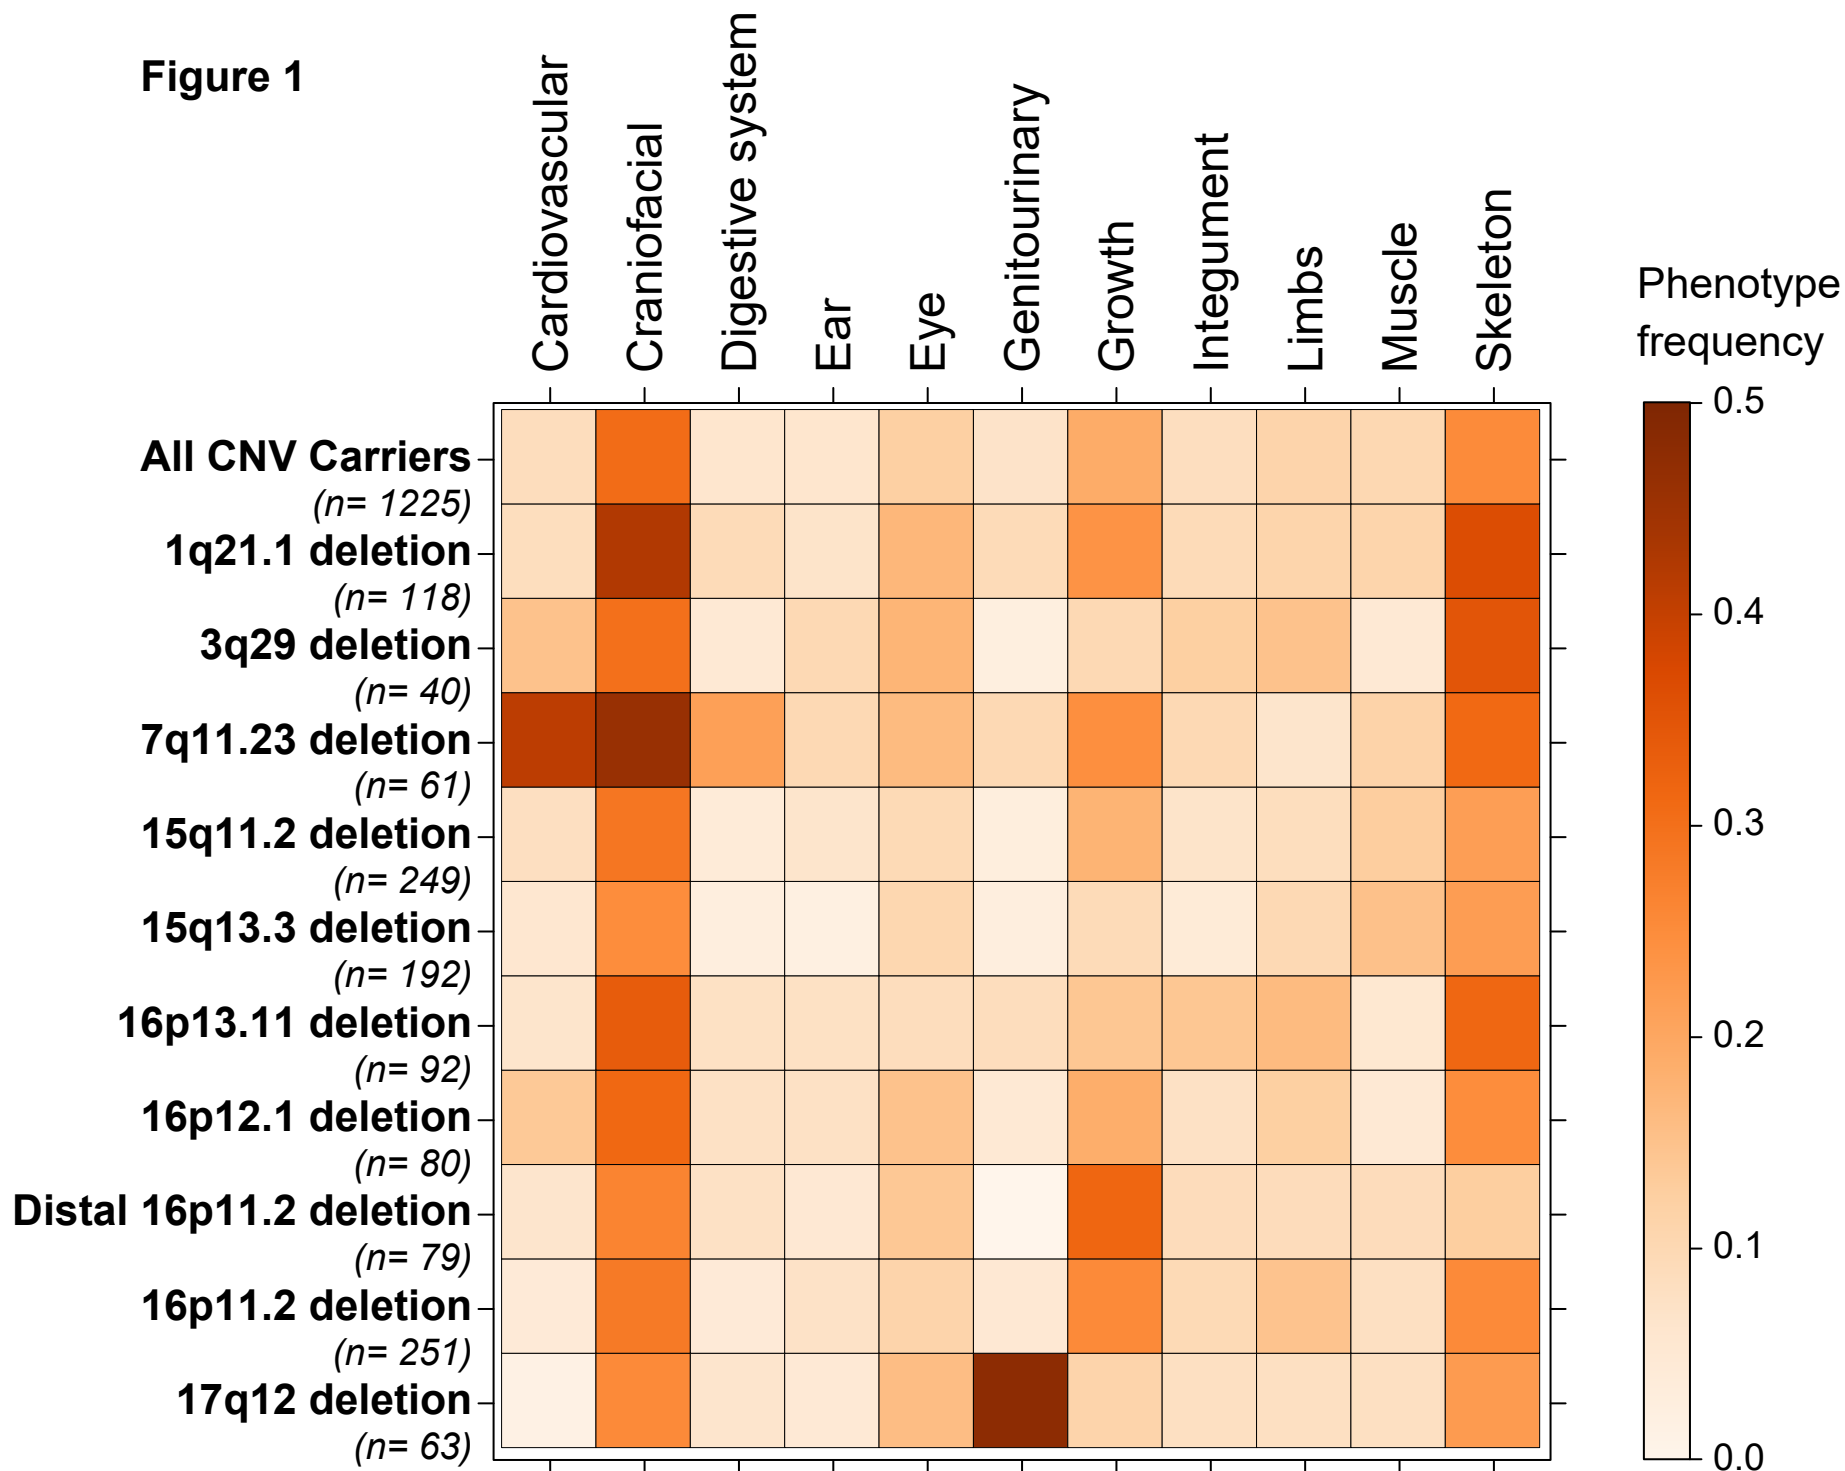

**Figure 2**

**A Experimental strategy**

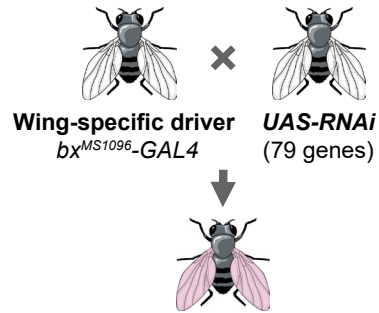

**Qualitative analysis**

- Wrinkled wings
- Ectopic veins
- Missing veins
- Discoloration
- Bristle planar polarity

**Quantitative analysis**

- Longitudinal veins (L2,L3,L4,L5)
- Crossveins (ACV, PCV)
- Wing area

**Tissue-specific effects**

- Compare to ubiquitous knockdown
- Compare to eye-specific knockdown
- Gene expression across multiple tissues (Human and flies)

**Cellular processes and developmental pathways**

- Apoptosis
- Cell proliferation
- Disruptions in signaling pathways
- Human tissue-specific network analysis (Brain, heart, kidney)

**B Phenotypic analysis of adult wings in *Drosophila***

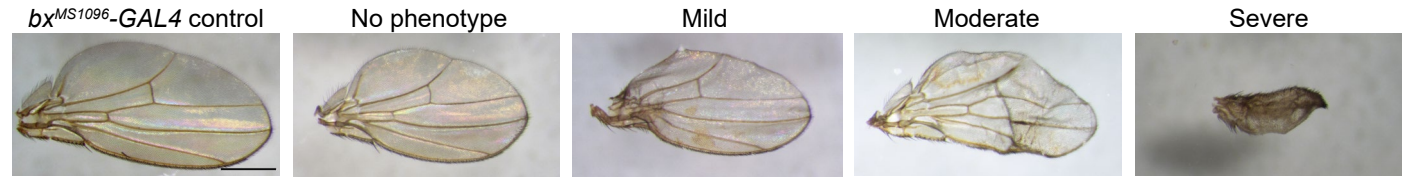

**C K-means clustering of qualitative wing data**

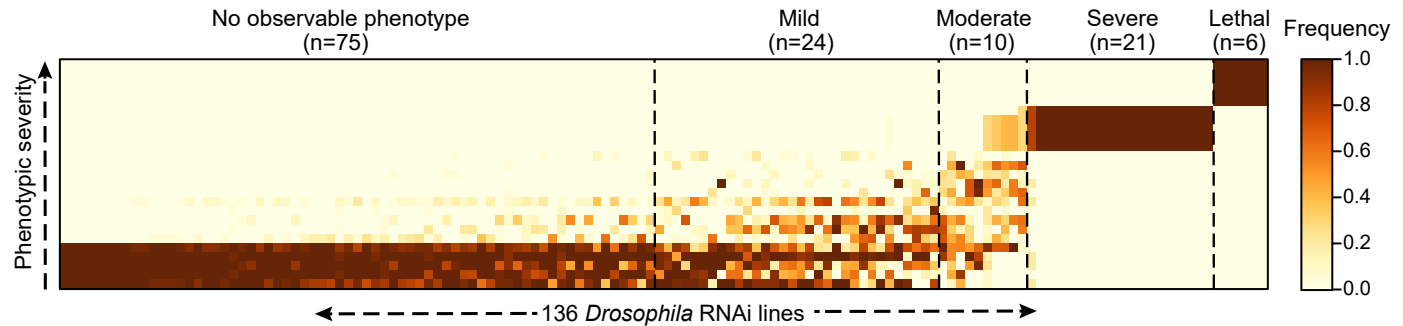

**D Summary of qualitative and quantitative adult wing phenotypes**

| Fly homologs                                                                                                 | RNAi lines | Qualitative phenotypes |      |          |        |        | Quantitative phenotypes |                |
|--------------------------------------------------------------------------------------------------------------|------------|------------------------|------|----------|--------|--------|-------------------------|----------------|
|                                                                                                              |            | No pheno.              | Mild | Moderate | Severe | Lethal | Wing area               | L3 vein length |
| CNV genes<br>(15q11.2, 15q13.3, 16p11.2, Distal 16p11.2,<br>16p12.1, 16p13.11, 17q12, 1q21.1, 3q29, 7q11.23) | 95         | 45                     | 21   | 7        | 16     | 6      | 65                      | 53             |
| Known neurodevelopmental genes<br>( $\beta$ -catenin, core genes, microcephaly)                              | 41         | 30                     | 3    | 3        | 5      | 0      | 24                      | 21             |
| Total                                                                                                        | 136        | 75                     | 24   | 10       | 21     | 6      | 89                      | 74             |

**Figure 3**

**A**

**Qualitative wing phenotypes of homologs of CNV genes**

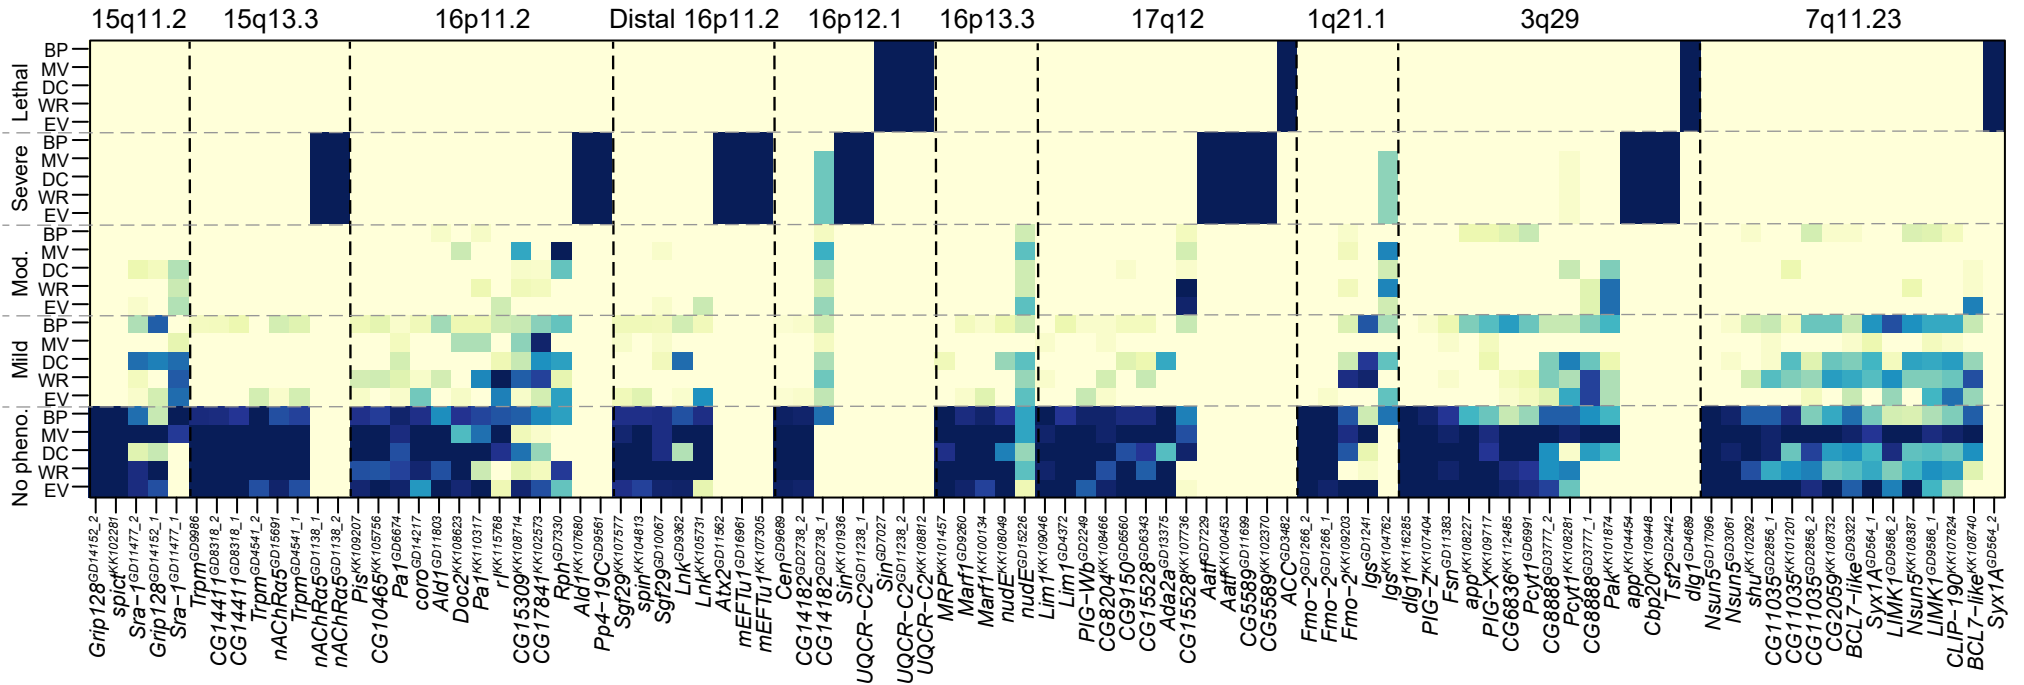

**B**

**Qualitative wing phenotypes of homologs of neurodevelopmental genes**

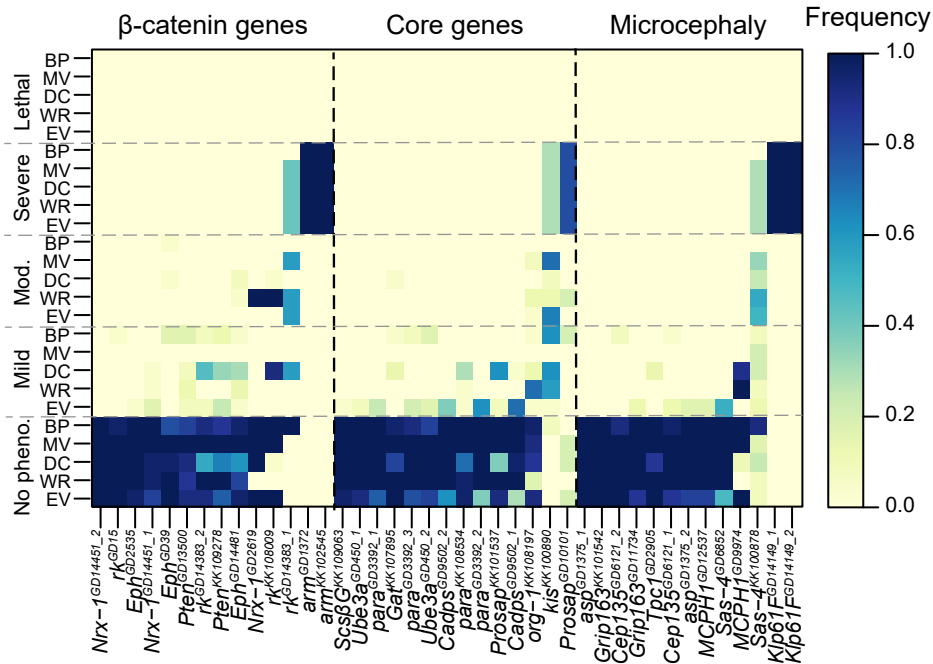

**C**

**Representative qualitative phenotypes in the adult wing**

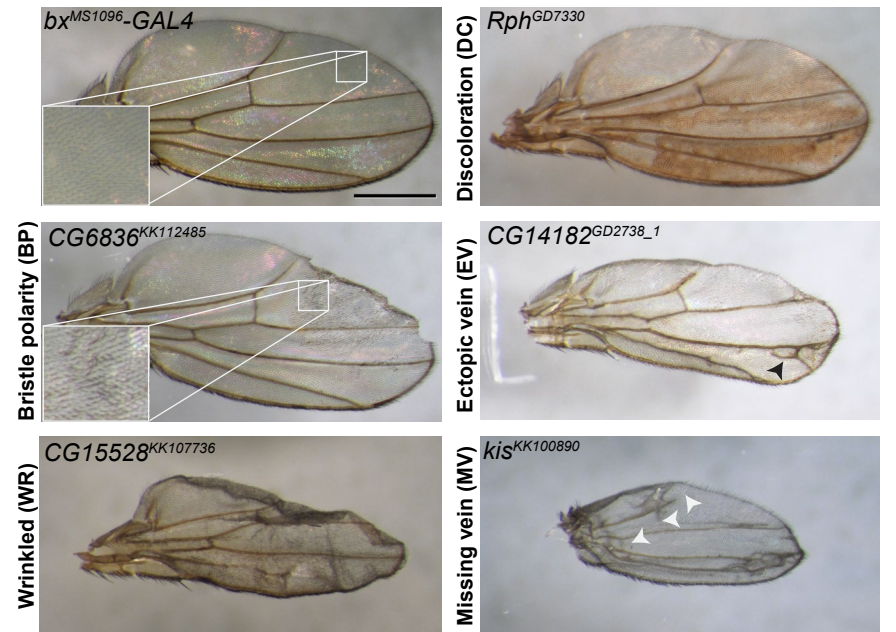



**Figure 4**

**A** Representative quantitative phenotypes in the adult wing

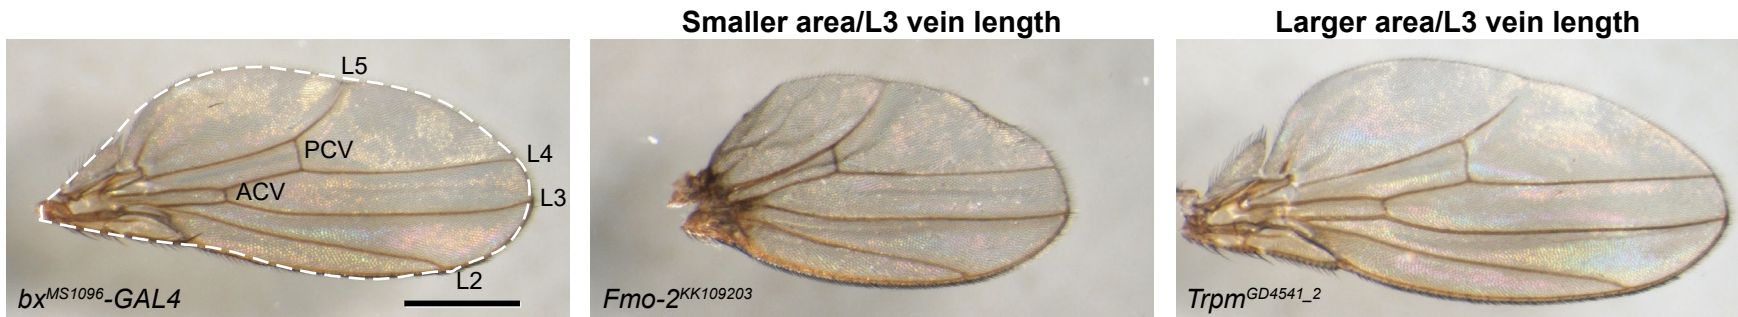

**B** L3 vein lengths for select homologs

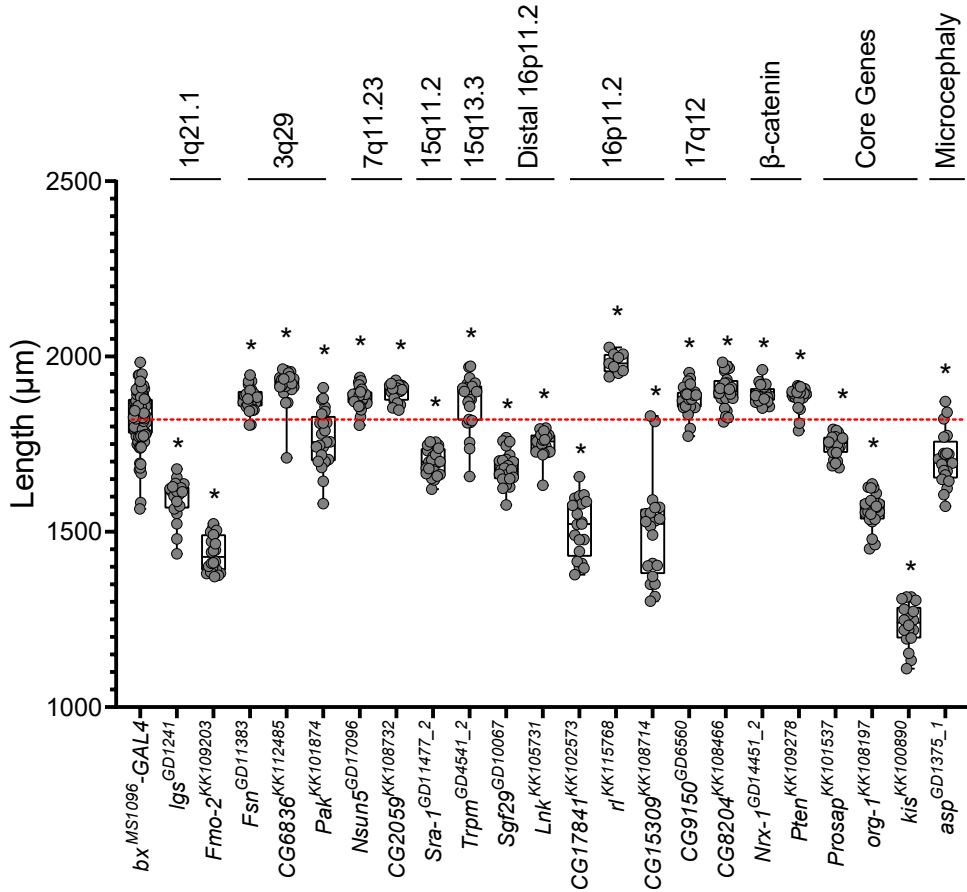

**C** Wing area for select homologs

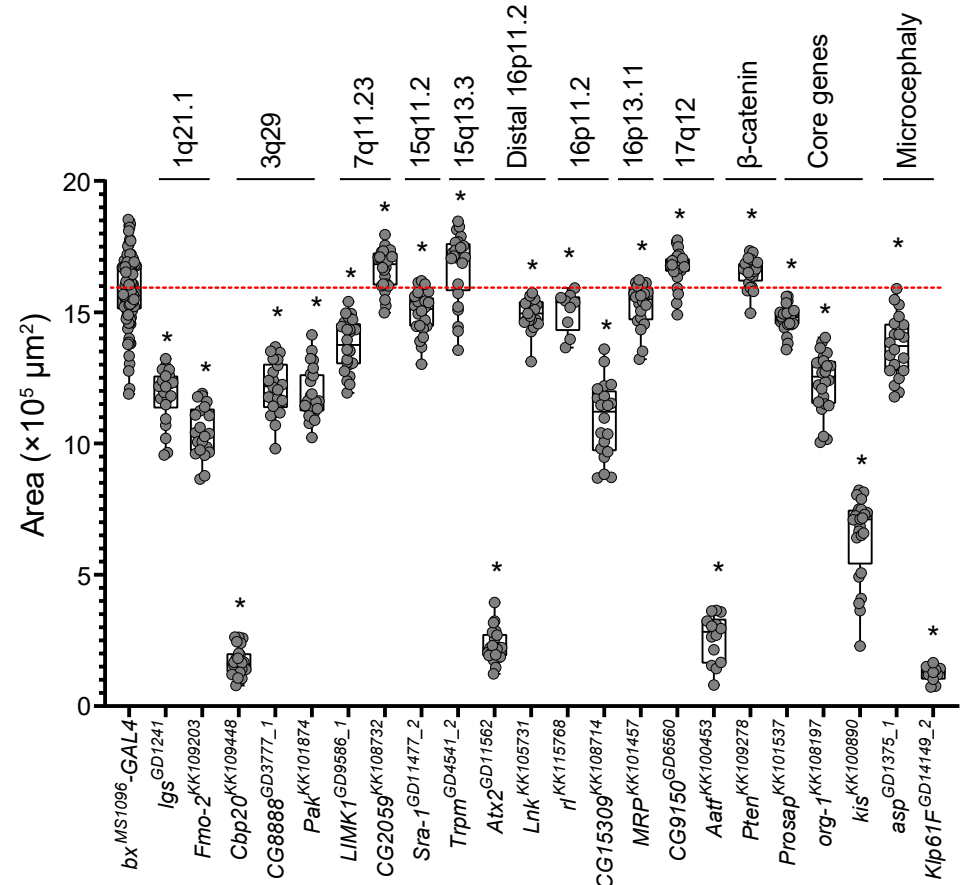

**Figure 5**

**A Ubiquitous knockdown**

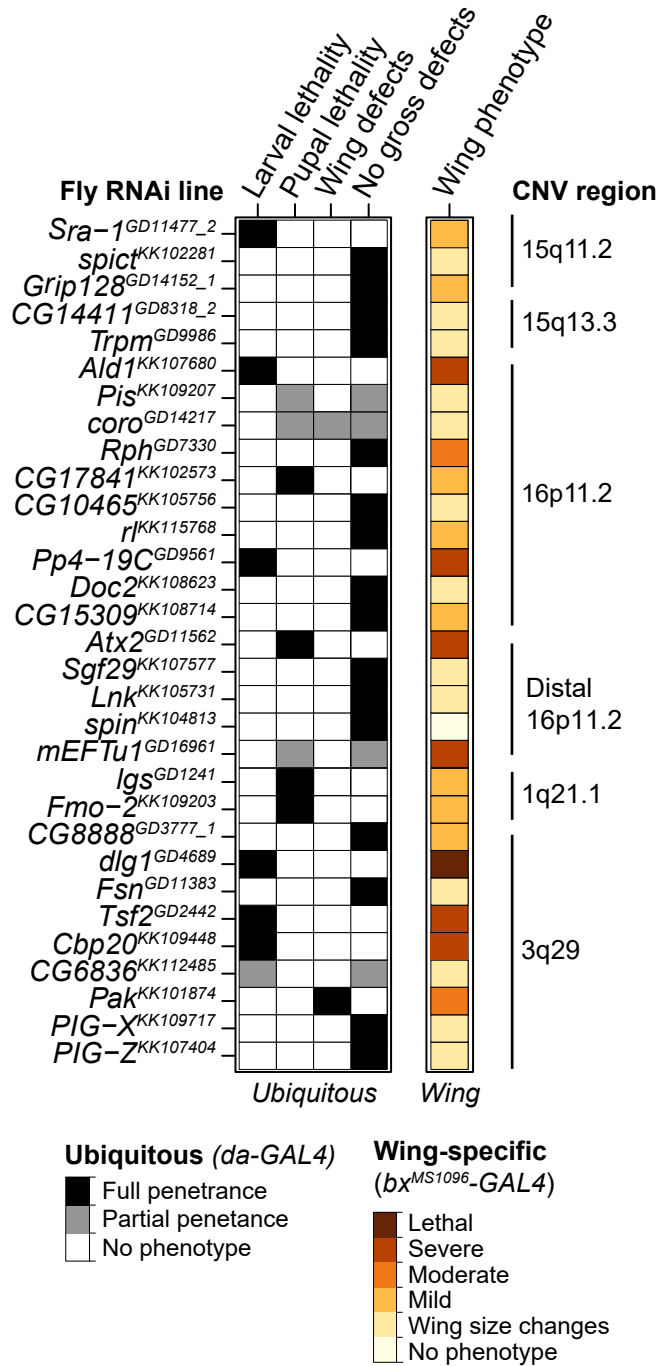

**B Eye versus wing phenotypes**

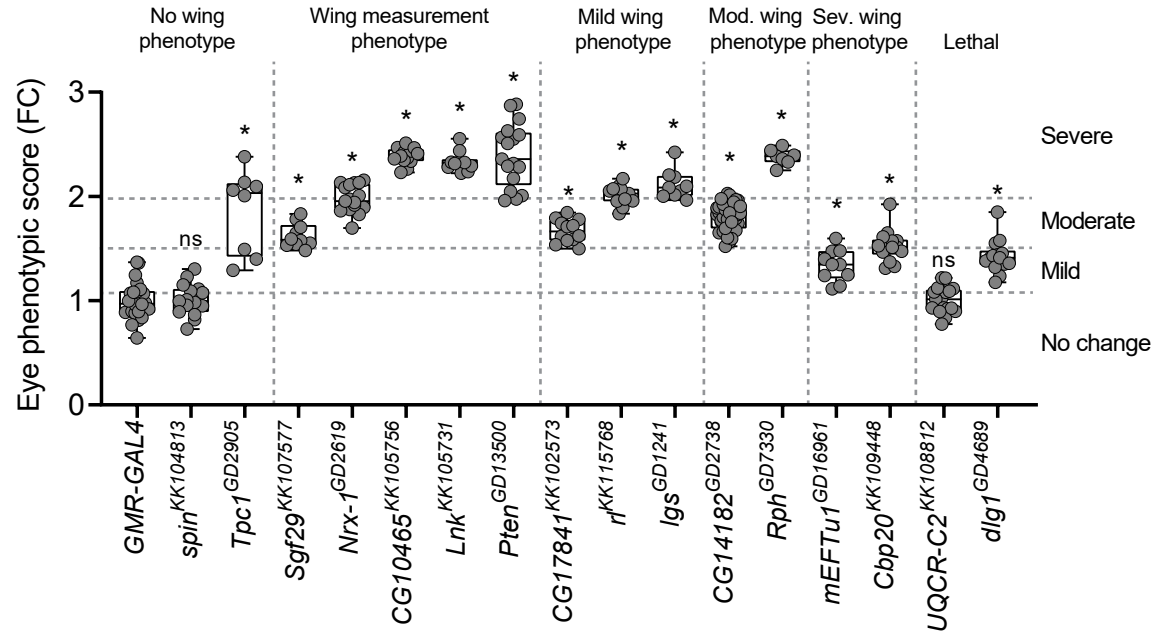

**C Severity of eye versus wing phenotype**

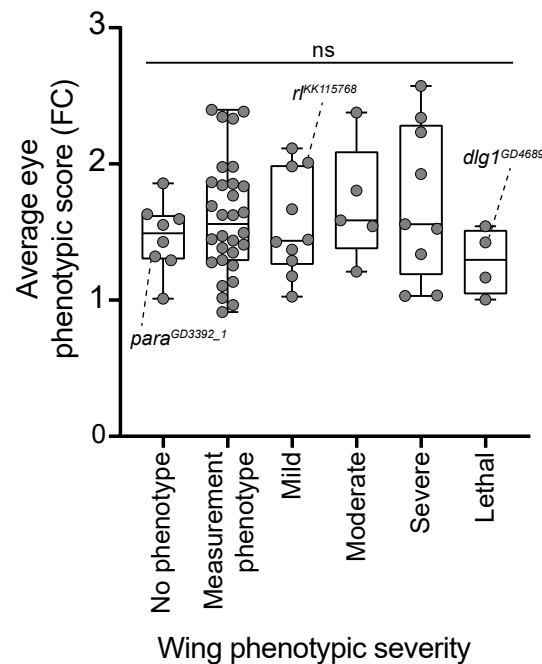

**D Representative eye and wing images**

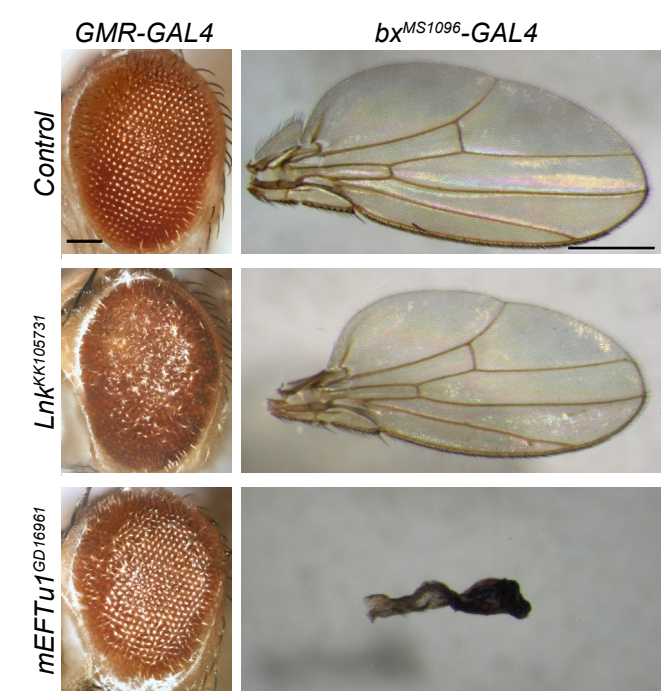



**Figure 6**

**A Expression patterns of fly homologs of CNV genes across multiple fly tissues**

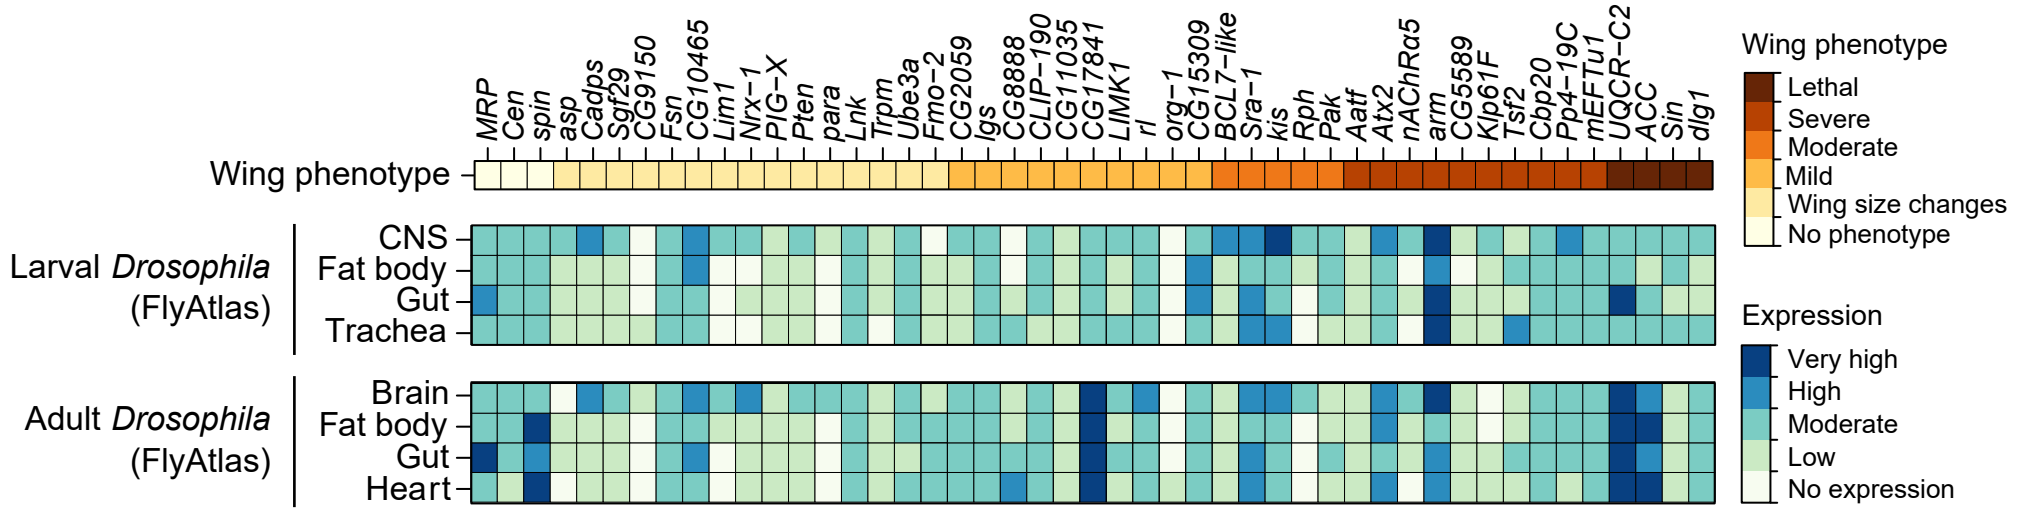

**B Expression patterns of CNV genes across multiple human tissues**

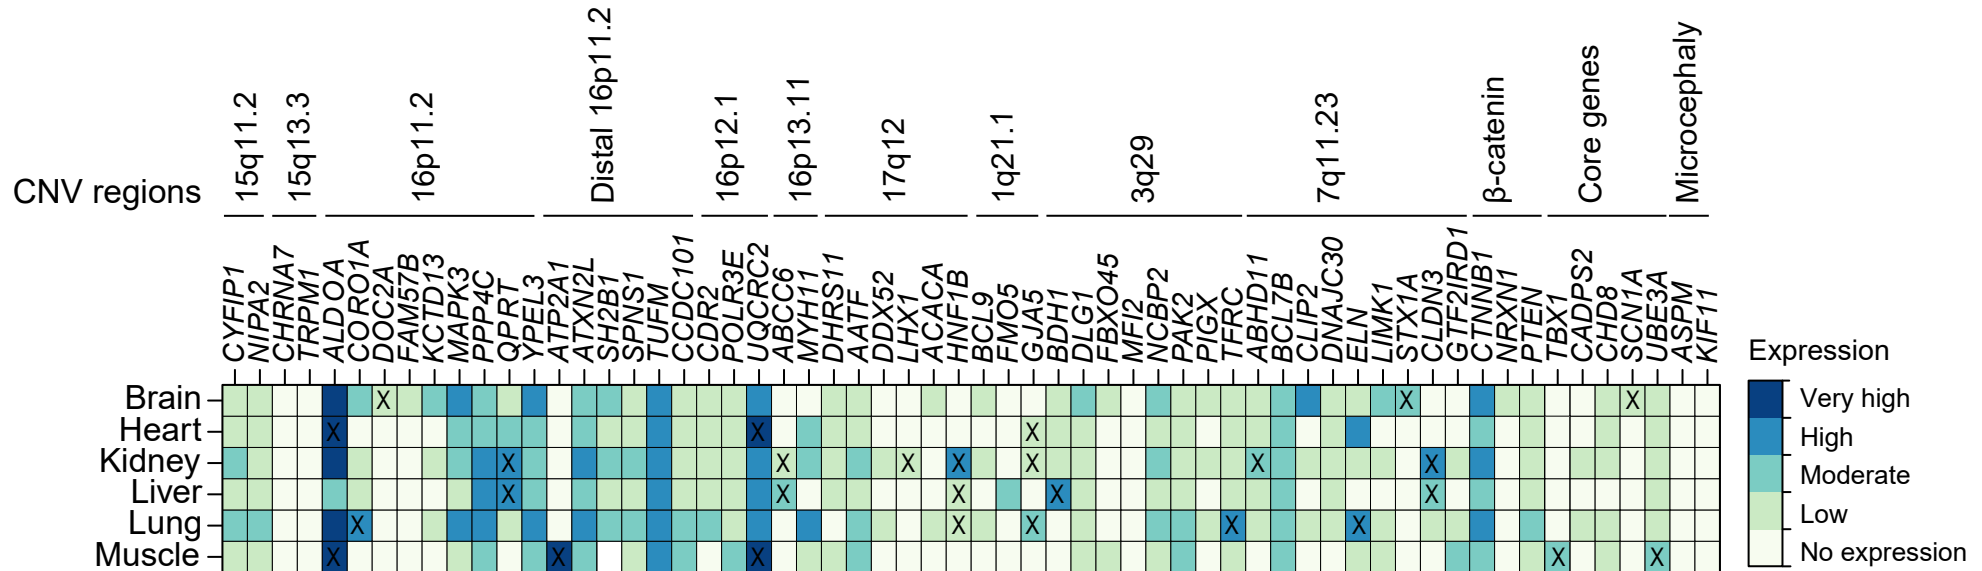

**Figure 7**

**A Cellular processes in larval wing discs**

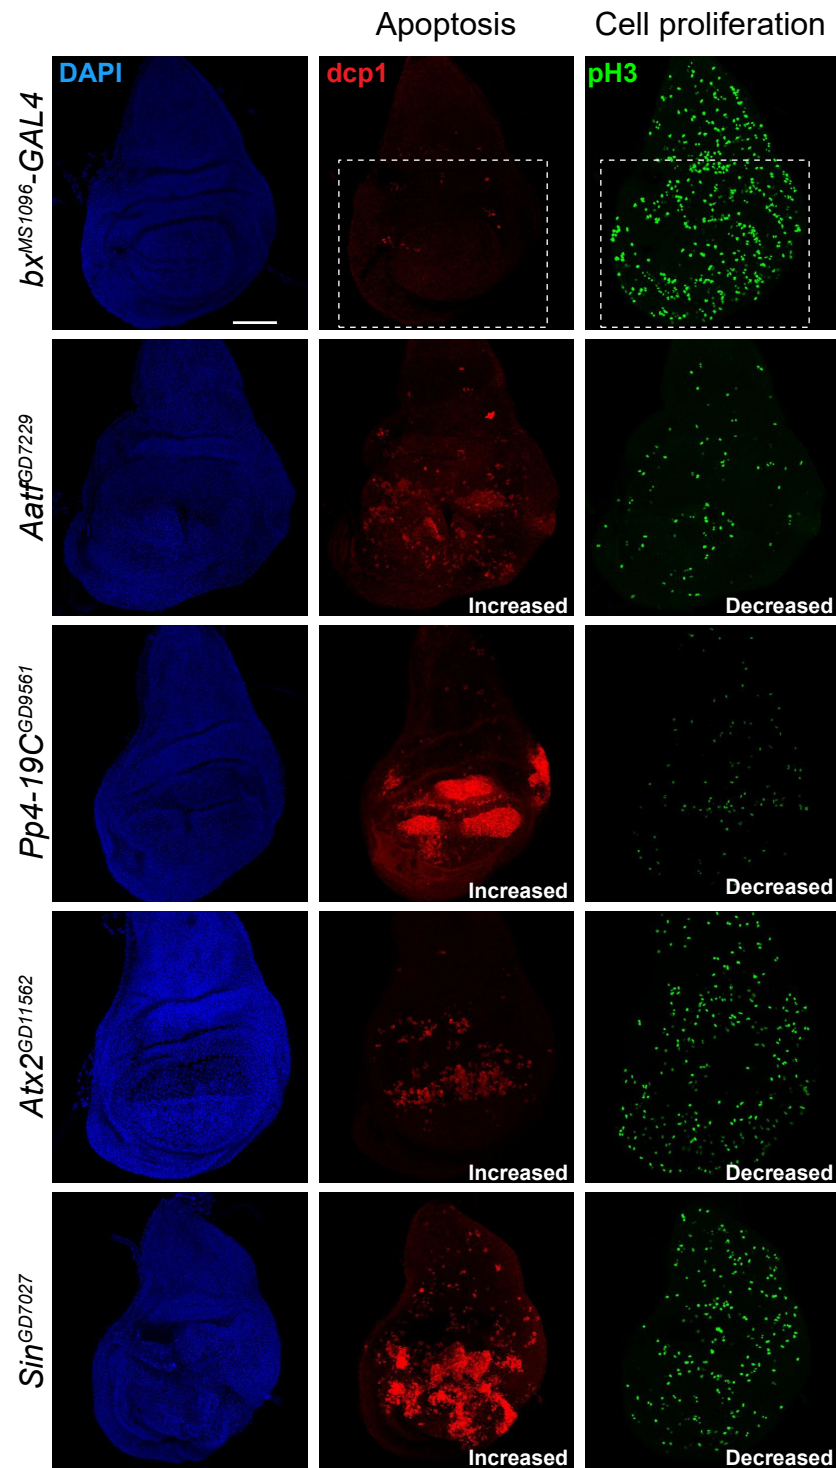

**B Quantification of apoptotic cells**

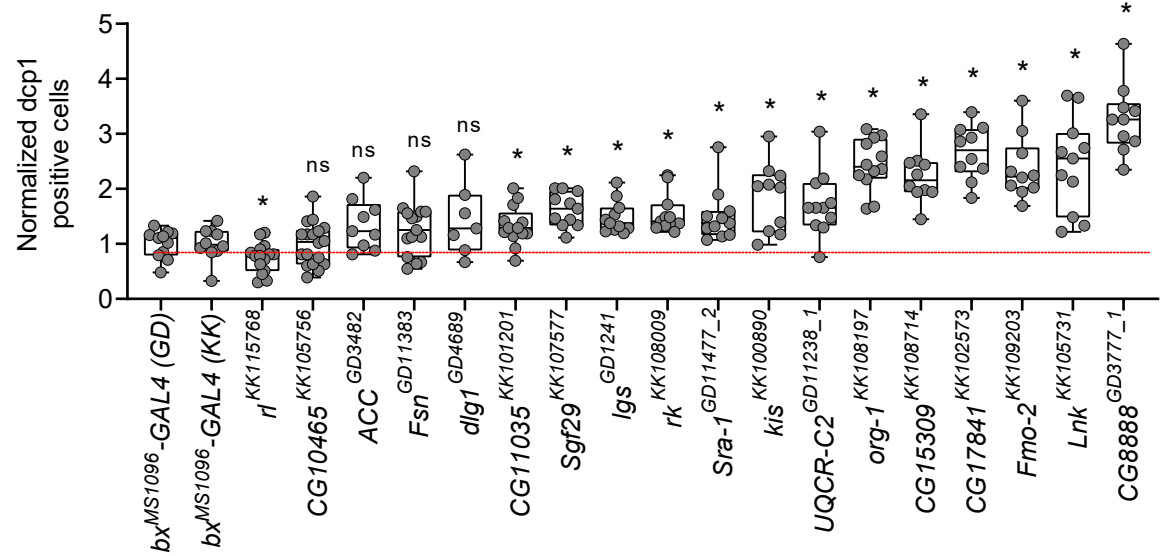

**C Quantification of proliferating cells**

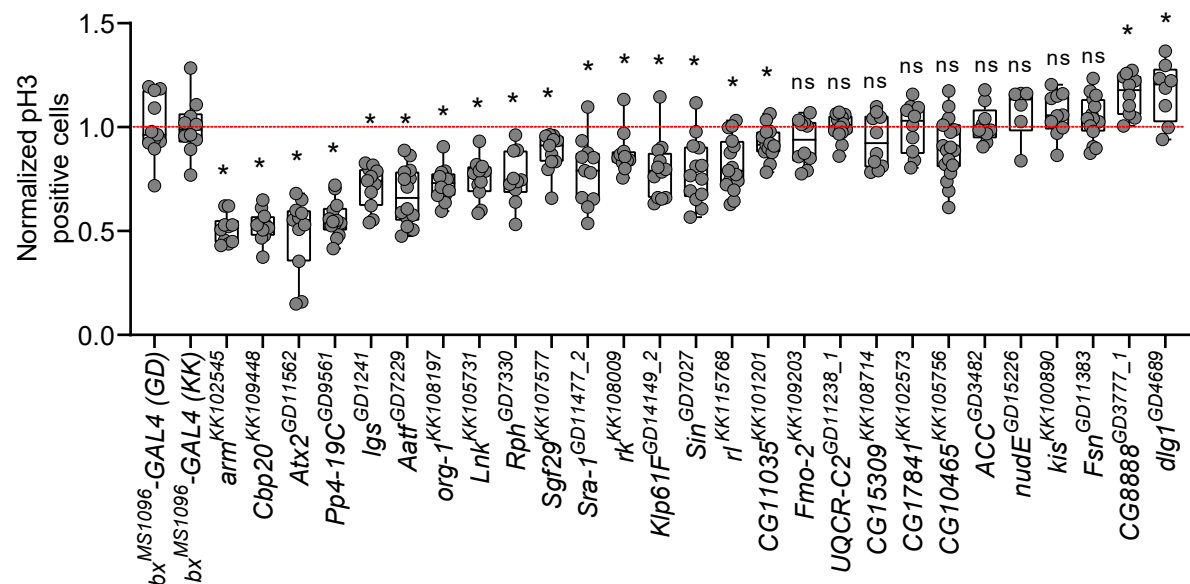

**Figure 8**

**Disruption of signaling pathways in larval wing discs**

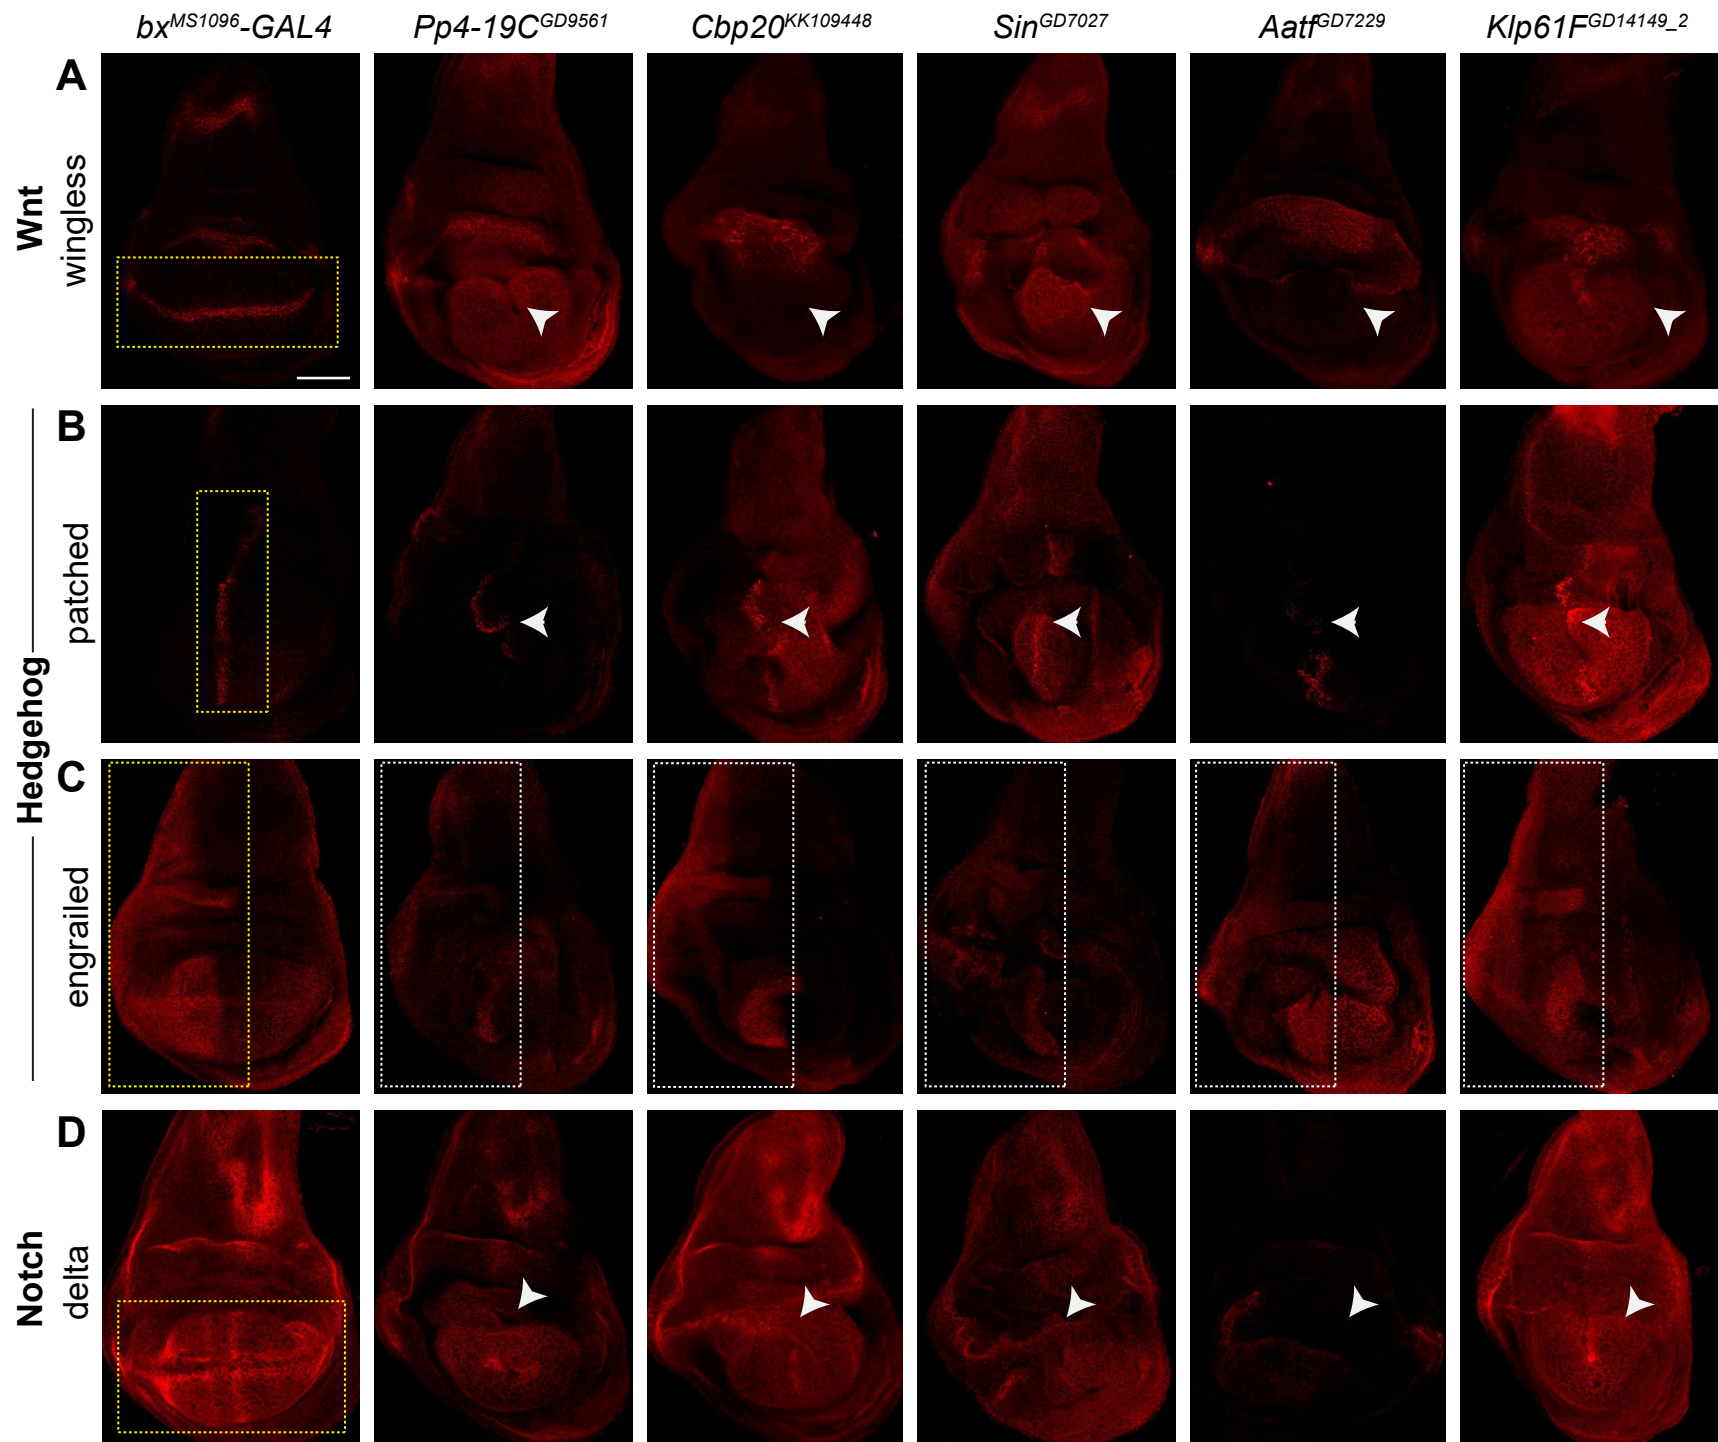



**Figure 9****A Human CNV genes interact with Notch signaling pathway genes in multiple tissues**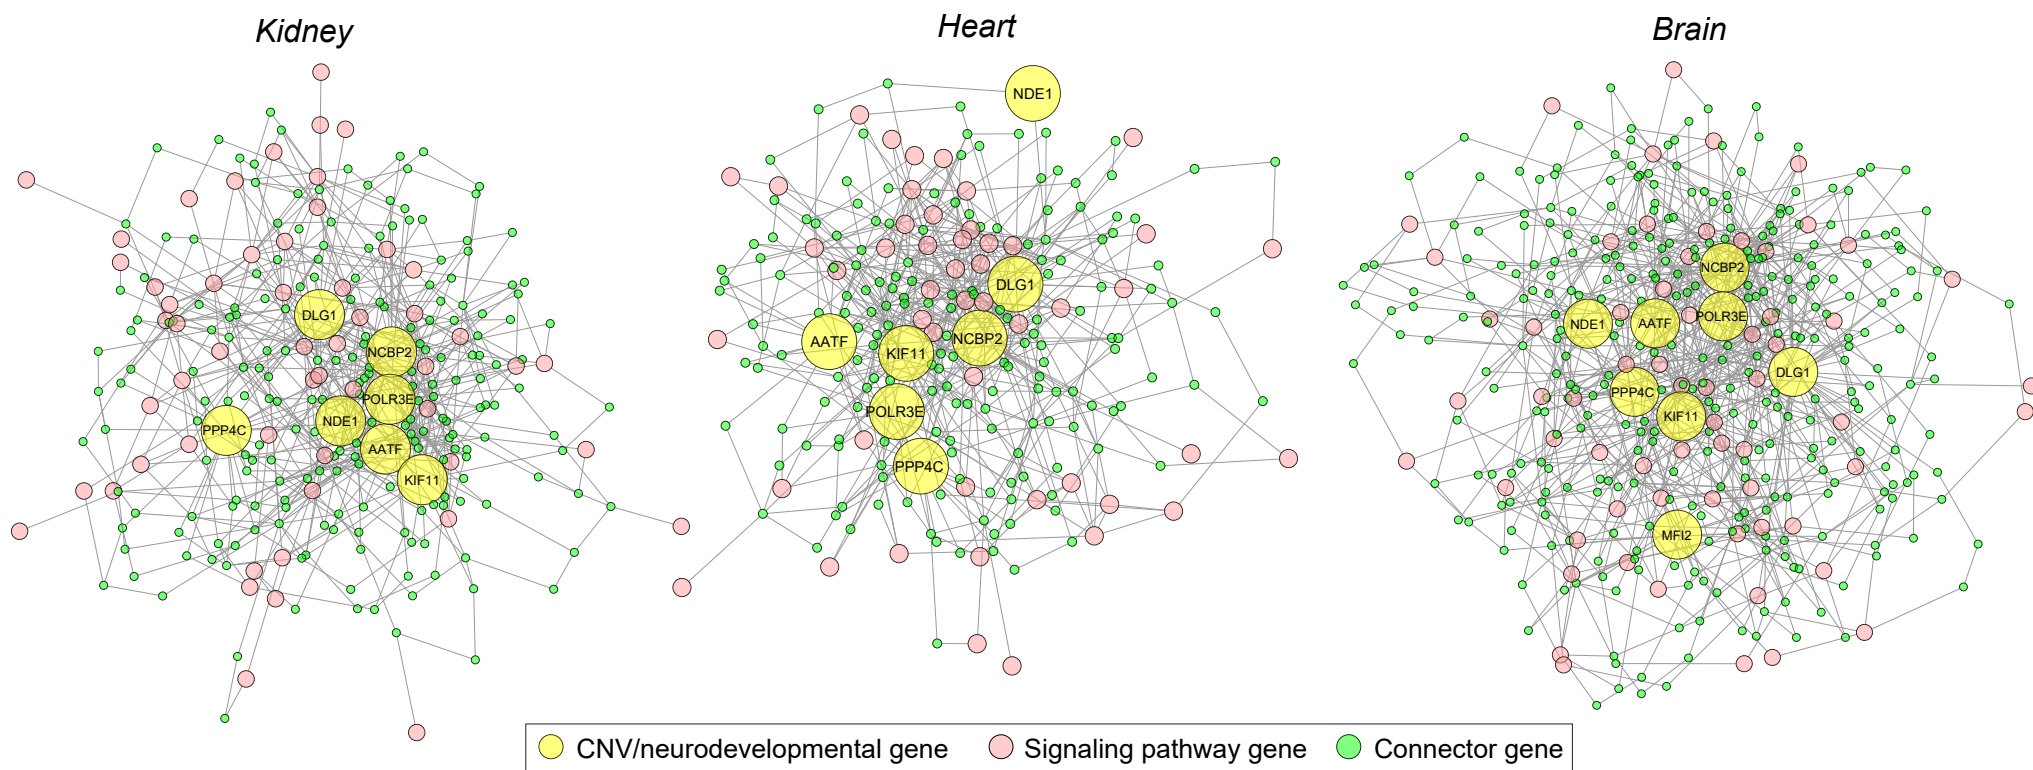**B Average connectivity of CNV genes to genes in signaling pathways**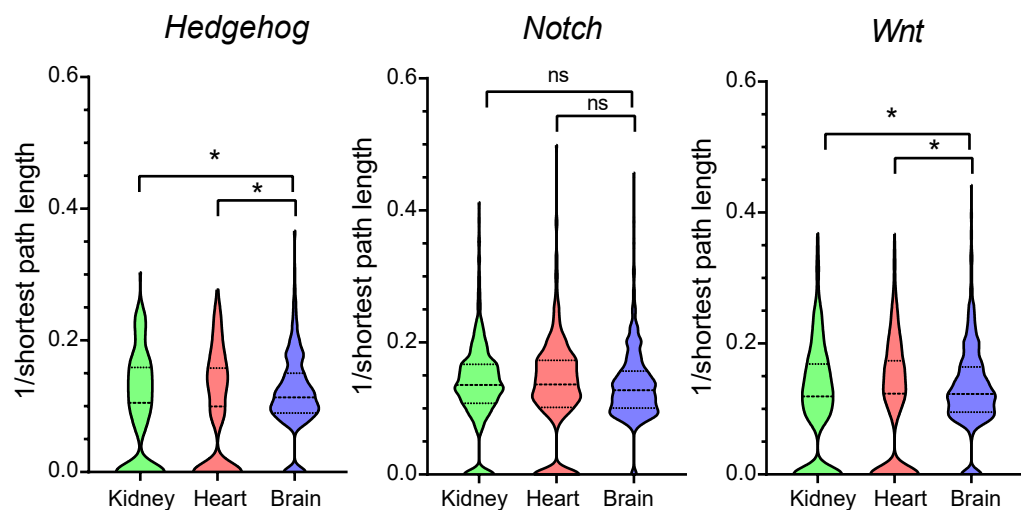**C GO term enrichment for connector genes in tissue-specific networks**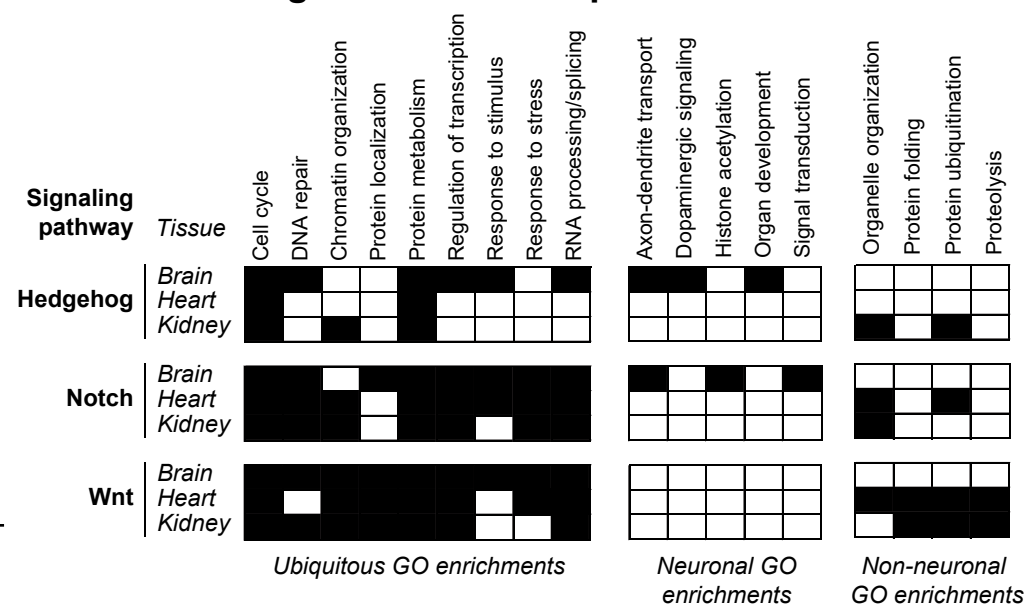

Figure 10

CNV region

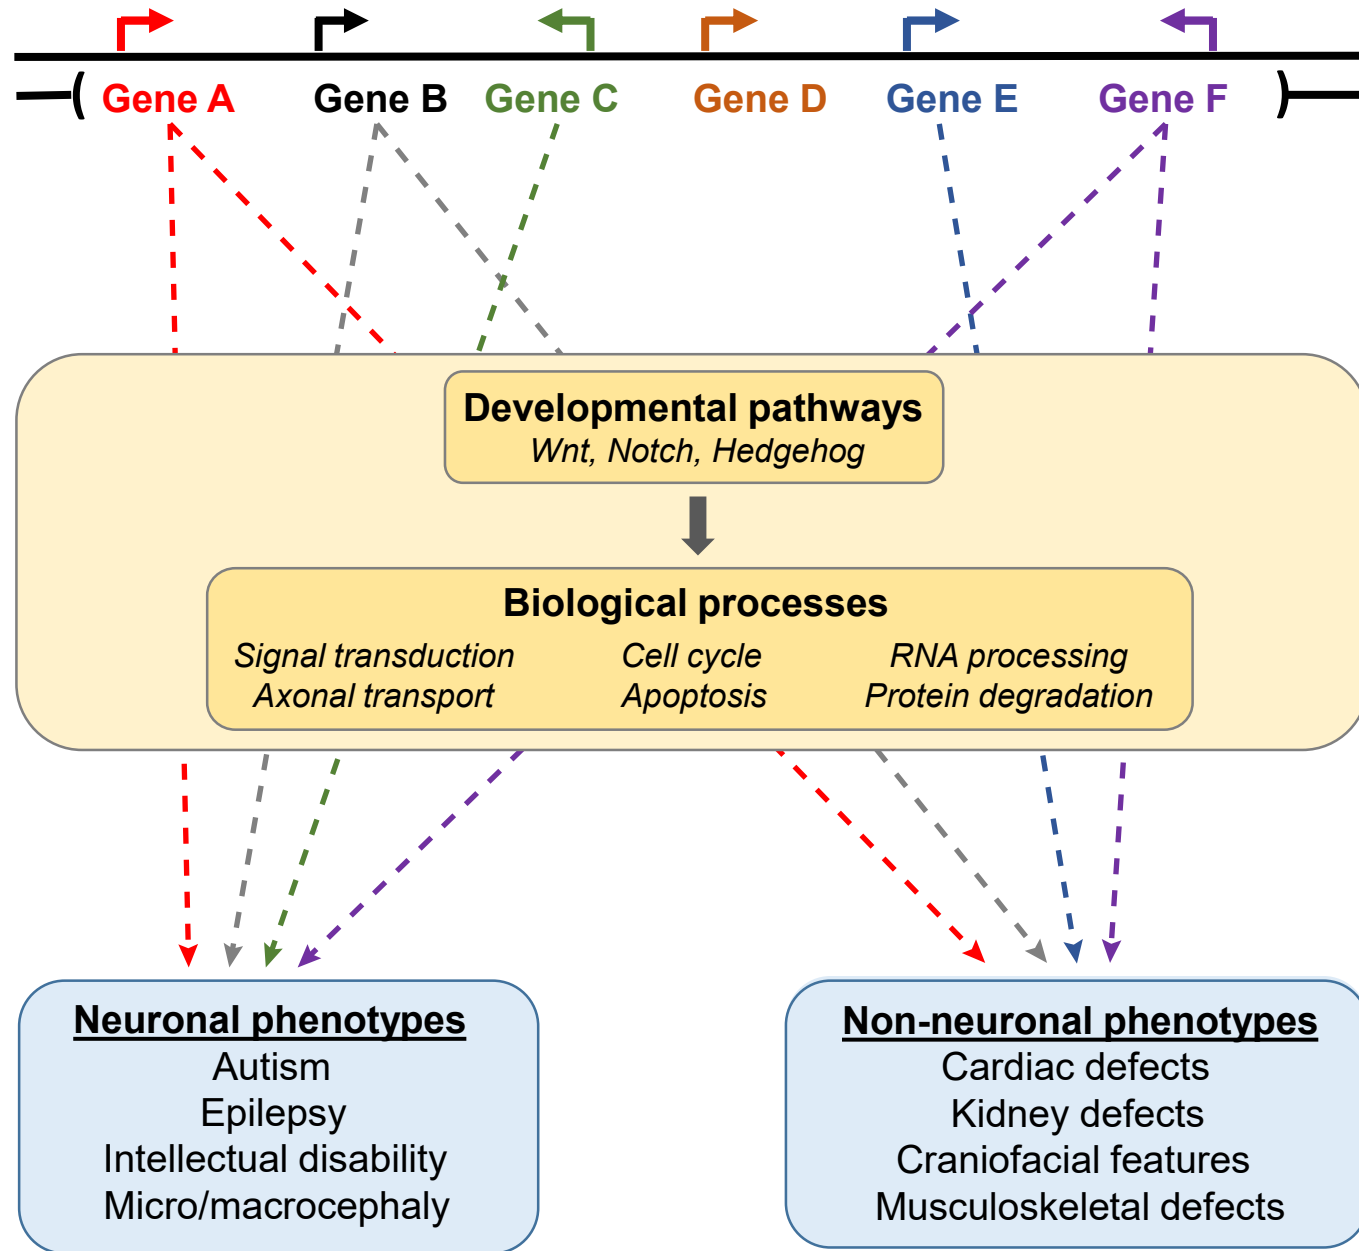

Source: https://www.biorxiv.org/content/10.1101/855338v1.full.pdf
