# Supplementary material for: Drosophila models of pathogenic copy-number variant genes show global and non-neuronal defects during development
Source: bioRxiv or medRxiv preprint supplement (doi:10.1101/855338), 2020-03-10
Supplement: Supplementary file [file media-1.pdf]

***Drosophila* models of pathogenic copy-number variant genes show global and non-neuronal defects during development**

Yusuff *et al.*

Supplementary information

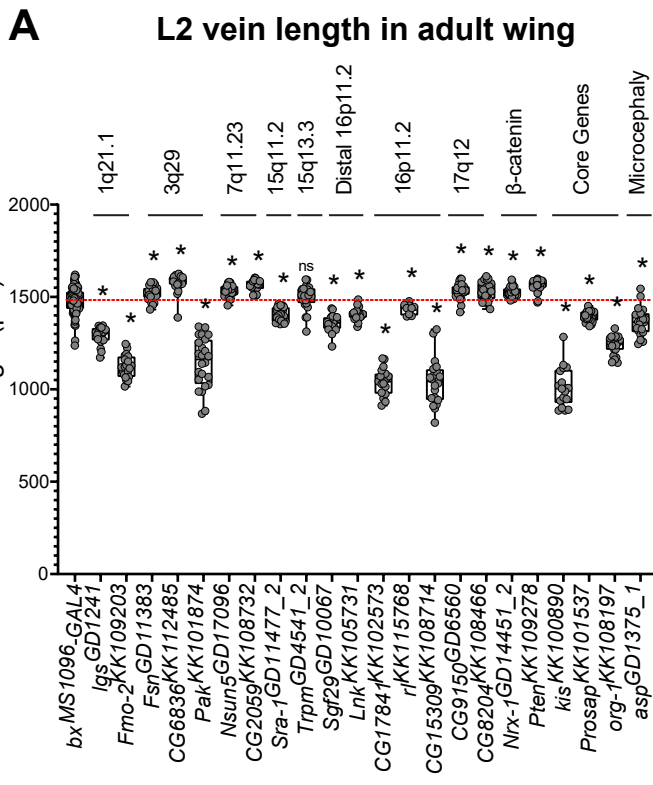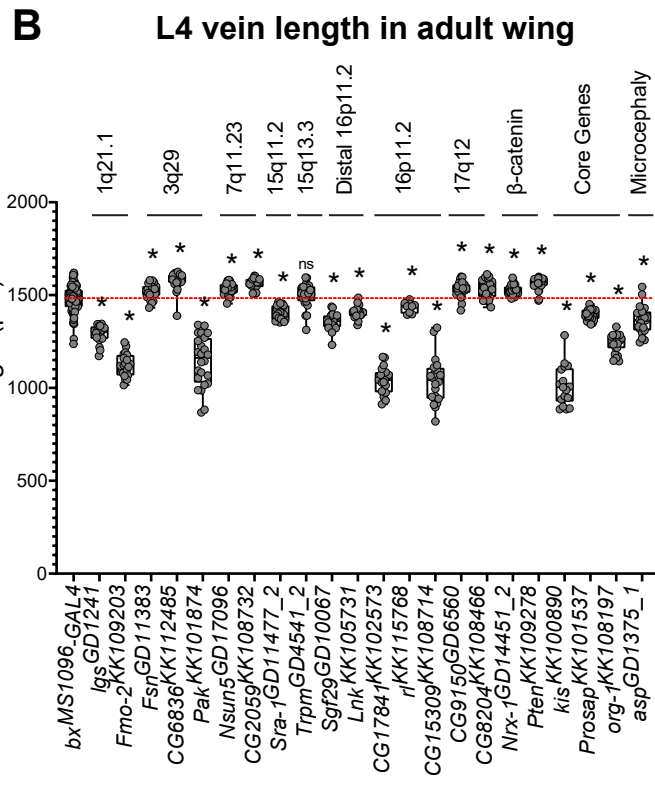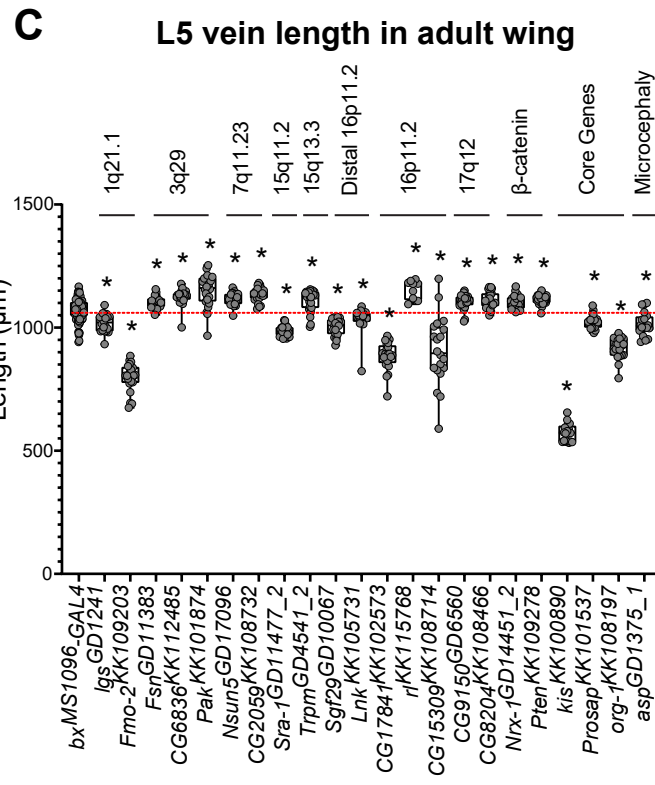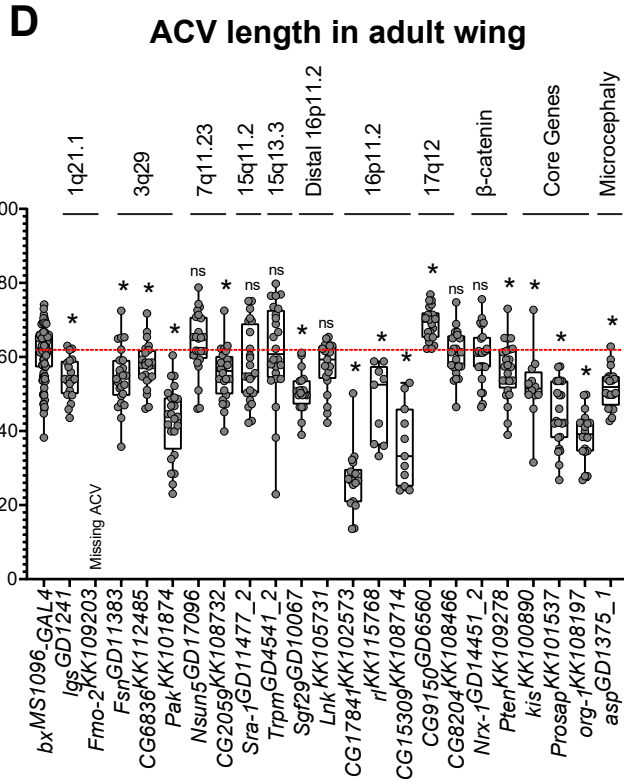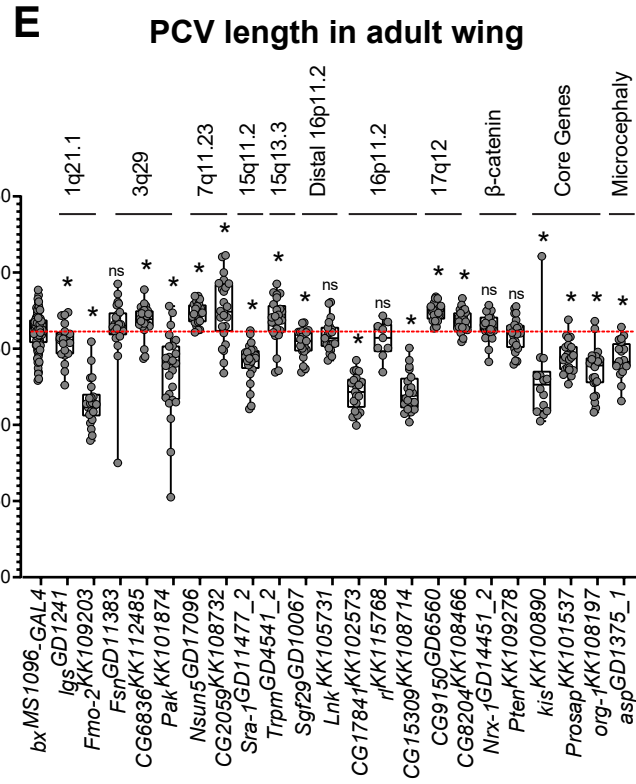

**Supplementary Figure 1. Quantitative vein length phenotypes for select *Drosophila* homologs of CNV and neurodevelopmental genes.** Boxplots of longitudinal veins (A) L2, (B) L4, (C) L5, and (D) anterior crossvein (ACV) and (E) posterior crossvein (PCV) lengths for knockdown of select homologs in adult fly wings (n = 9-91, \*p < 0.05, two-tailed Mann–Whitney test with Benjamini-Hochberg correction). All boxplots indicate median (center line), 25th and 75th percentiles (bounds of box), and minimum and maximum (whiskers), with red dotted lines representing the control median.

**A**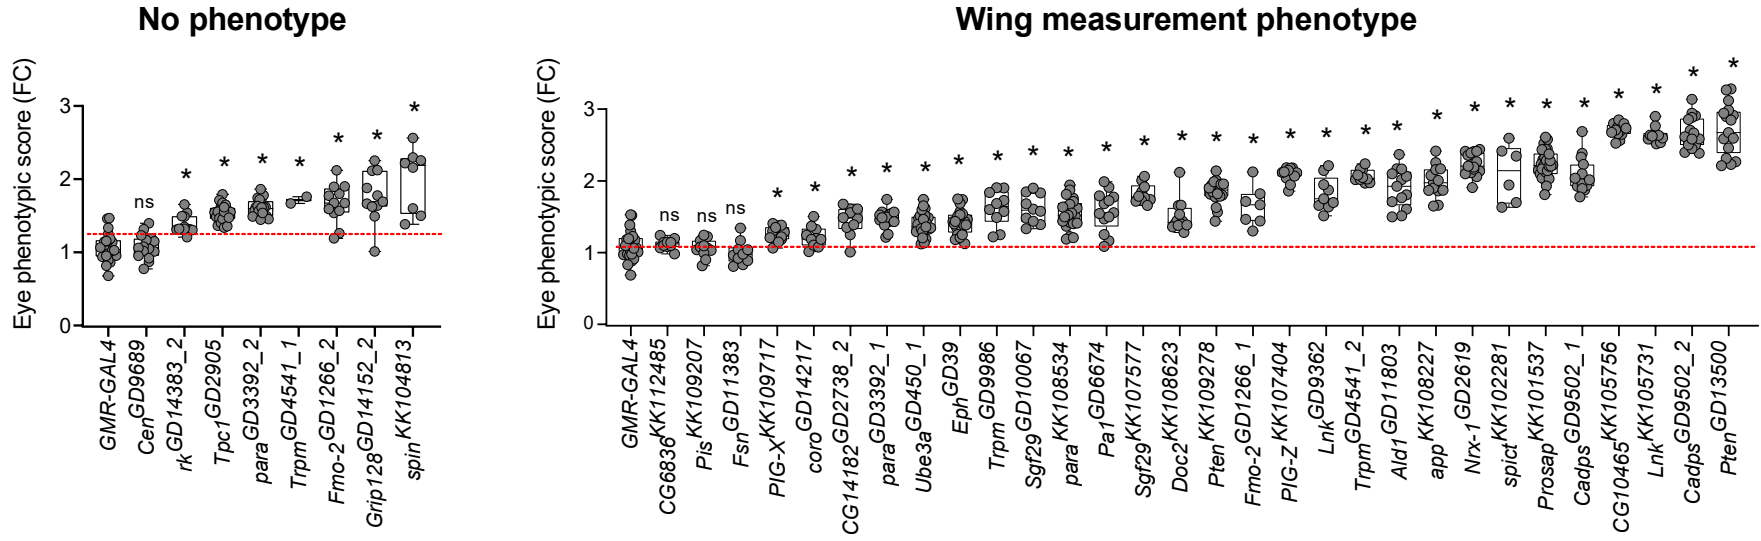**B**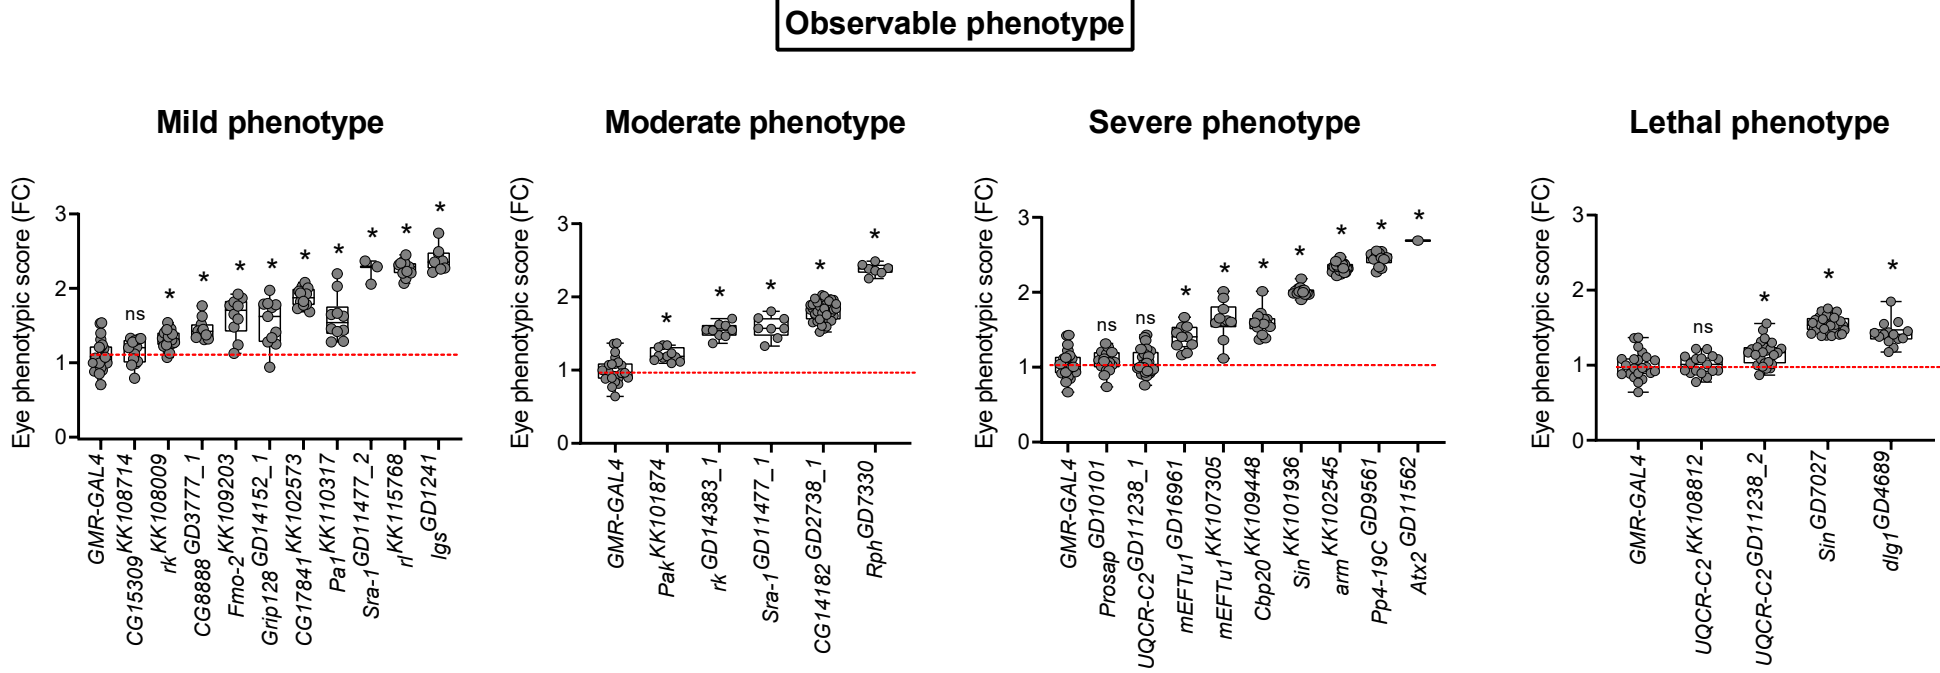

**Supplementary Figure 2. Comparisons of eye-specific and wing-specific knockdowns for select *Drosophila* homologs of CNV and neurodevelopmental genes.** Boxplots of *Flynotyper*-derived phenotypic scores for 66 tested adult eyes with eye-specific knockdown (*GMR-GAL4*) of select homologs of CNV and neurodevelopmental genes, normalized as fold-change (FC) to control values (n = 1–40, \*p < 0.05, one-tailed Mann–Whitney test with Benjamini-Hochberg correction). RNAi lines that do not show any observable qualitative adult wing phenotypes, including lines that show wing measurement phenotypes, are represented in **(A)**, and RNAi lines with observable mild to lethal qualitative wing phenotypes are represented in **(B)**. All boxplots indicate median (center line), 25th and 75th percentiles (bounds of box), and minimum and maximum (whiskers), with red dotted lines representing the control median.

**A** Larval *Drosophila* expression

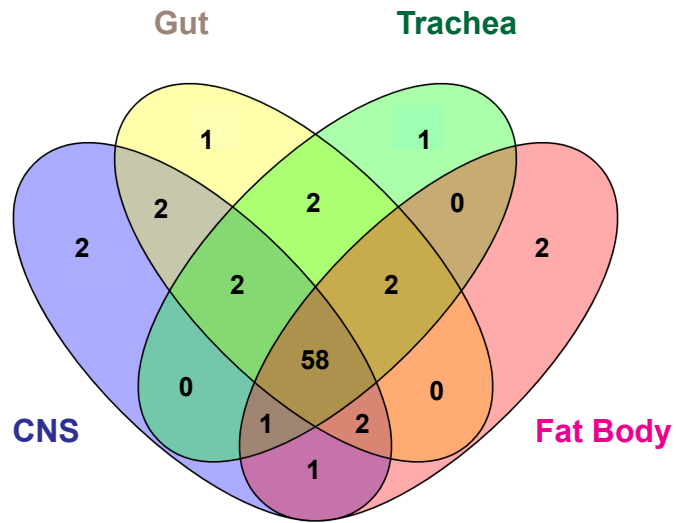

**B** Adult *Drosophila* expression

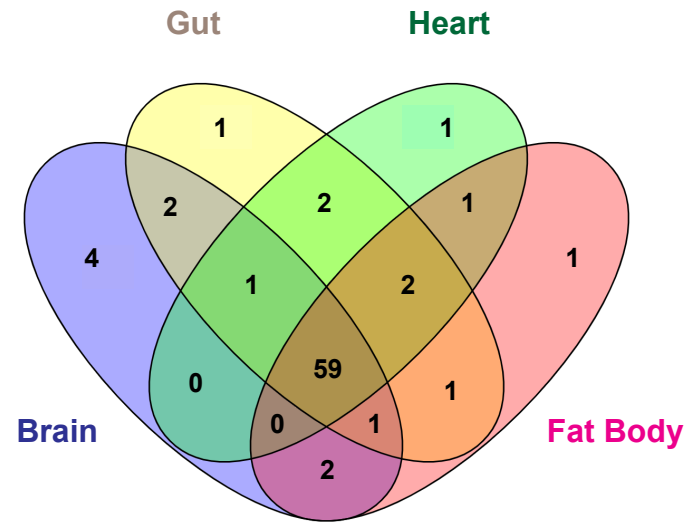

**Supplementary Figure 3. Expression of *Drosophila* homologs of CNV and neurodevelopmental genes in larval and adult tissues.** Venn diagrams representing the number of 76/77 tested fly homologs for CNV and neurodevelopmental genes expressed (>10 fragments per kilobase of transcript per million reads, or FPKM) in **(A)** larval (central nervous system or CNS, gut, trachea, and fat body) and **(B)** adult tissues (brain, gut, heart and fat body), are shown.

## Cellular processes in larval wing discs

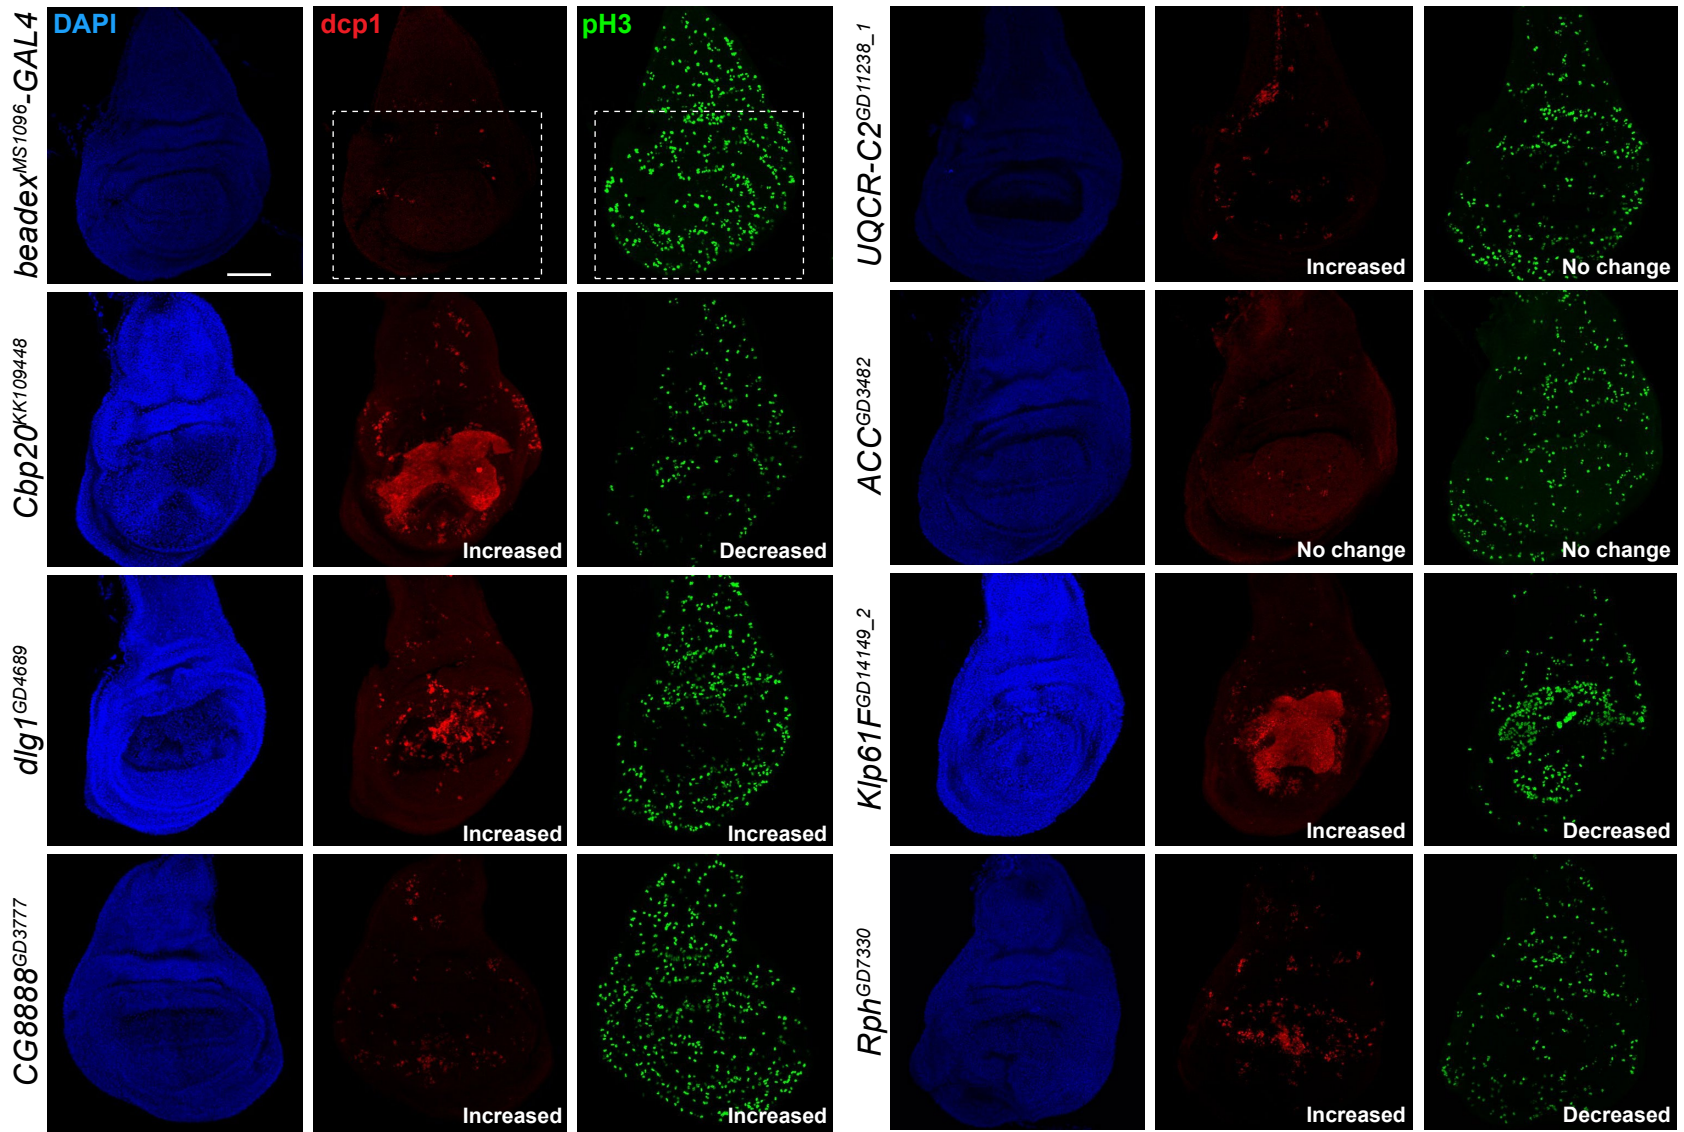



**Supplementary Figure 4. Additional *Drosophila* homologs of CNV and neurodevelopmental genes show altered levels of cell proliferation and apoptosis.** Larval imaginal wing discs (scale bar = 50  $\mu$ m) stained with nuclear marker DAPI, apoptosis marker dcp1, and cell proliferation marker pH3 illustrate altered levels of cell proliferation and apoptosis due to wing-specific knockdown of select fly homologs of CNV genes. We examined changes in the number of stained cells within the wing pouch of the wing disc (white box), which becomes the adult wing. Genotypes for the wing images are:  $w^{1118}/bx^{MS1096}-GAL4;+; UAS-Dicer2/+$ ,  $w^{1118}/bx^{MS1096}-GAL4;UAS-Cbp20^{KK109448}/+; UAS-Dicer2/+$ ,  $w^{1118}/bx^{MS1096}-GAL4;+; UAS-dlg1^{GD4689} RNAi/UAS-Dicer2$ ,  $w^{1118}/bx^{MS1096}-GAL4;UAS-CG8888^{GD3777}/+; UAS-Dicer2/+$ ,  $w^{1118}/bx^{MS1096}-GAL4;+; UAS-UQCR-C2^{GD11238} RNAi/UAS-Dicer2$ ,  $w^{1118}/bx^{MS1096}-GAL4;+; UAS-ACC^{GD3482} RNAi/UAS-Dicer2$ ,  $w^{1118}/bx^{MS1096}-GAL4;UAS-Klp61F^{GD14149}/+; UAS-Dicer2/+$ , and  $w^{1118}/bx^{MS1096}-GAL4;UAS-Rph^{GD7330} RNAi/+;UAS-Dicer2/+$ .

## A Cellular processes in female and male larval wing discs

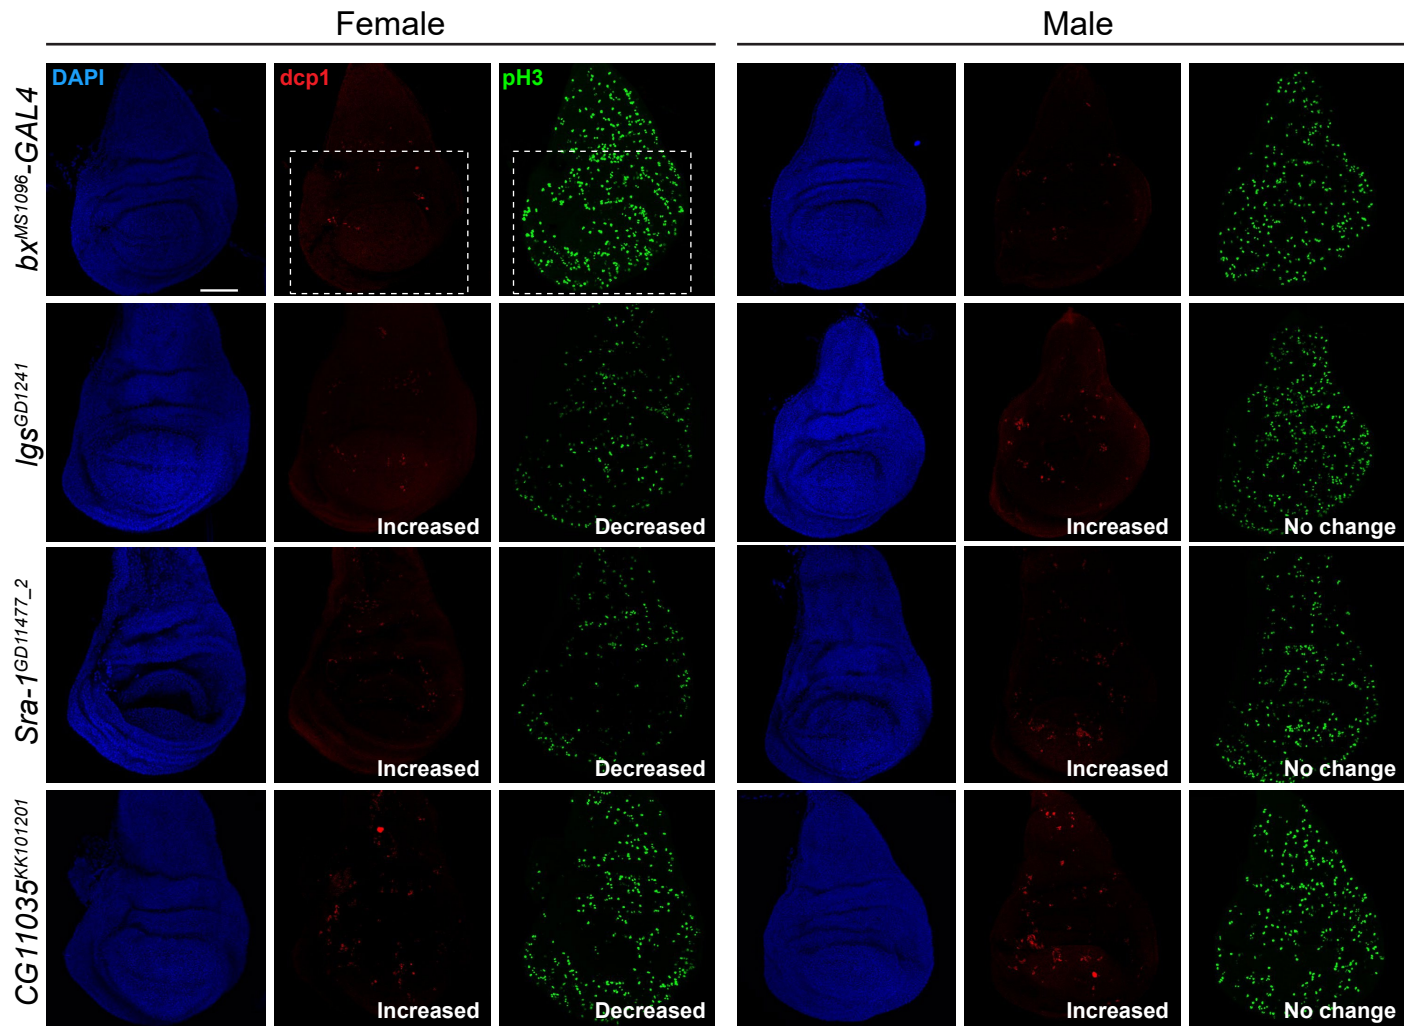

## B Apoptosis in larval wing discs

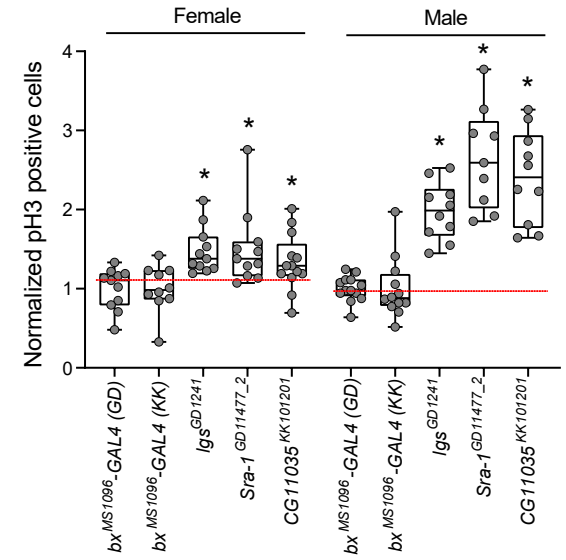

## C Cell proliferation in larval wing discs

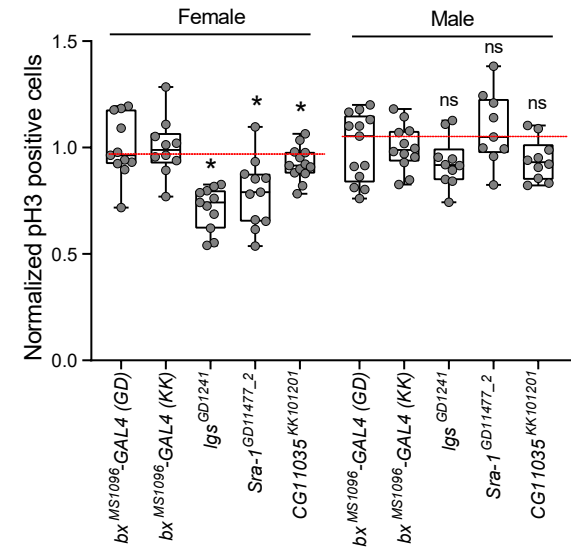

**Supplementary Figure 5. Select female and male *Drosophila* homologs of CNV and neurodevelopmental genes show altered levels of cell proliferation and apoptosis.** (A) Larval imaginal wing discs (scale bar = 50  $\mu$ m) stained with nuclear marker DAPI, apoptosis marker dcp1, and cell proliferation marker pH3 illustrate altered levels of cell proliferation and apoptosis due to wing-specific knockdown of select fly homologs of CNV genes in females and males. We examined changes in the number of stained cells within the wing pouch of the wing disc (white box), which becomes the adult wing. Genotypes for the wing images are:  $w^{1118}/bx^{MS1096}-GAL4;+; UAS-Dicer2/+$ ,  $w^{1118}/bx^{MS1096}-GAL4;+; UAS-Igs^{GD1241}/UAS-Dicer2$ ,  $w^{1118}/bx^{MS1096}-GAL4;+; UAS-Sra-1^{GD11477}/UAS-Dicer2$ , and  $w^{1118}/bx^{MS1096}-GAL4;UAS-CG11035^{KK101201} RNAi+; UAS-Dicer2/+$ . (B) Box plot of dcp1-positive cells in larval wing discs with knockdown of select fly homologs of CNV and neurodevelopmental genes, normalized to controls (n = 9–13, \*p < 0.05, two-tailed Mann–Whitney test with Benjamini-Hochberg correction). The number of dcp1 positive cells were calculated manually. (C) Box plot of pH3-positive cells in the larval wing discs with knockdown of select fly homologs of CNV and neurodevelopmental genes, normalized to controls (n = 9–13, \*p < 0.05, two-tailed Mann–Whitney test with Benjamini-Hochberg correction). The number of pH3 positive cells were calculated using the AnalyzeParticles function in ImageJ. All boxplots indicate median (center line), 25th and 75th percentiles (bounds of box), and minimum and maximum (whiskers), with red dotted lines representing the control median.

# Disruption of signaling pathways in larval wing discs

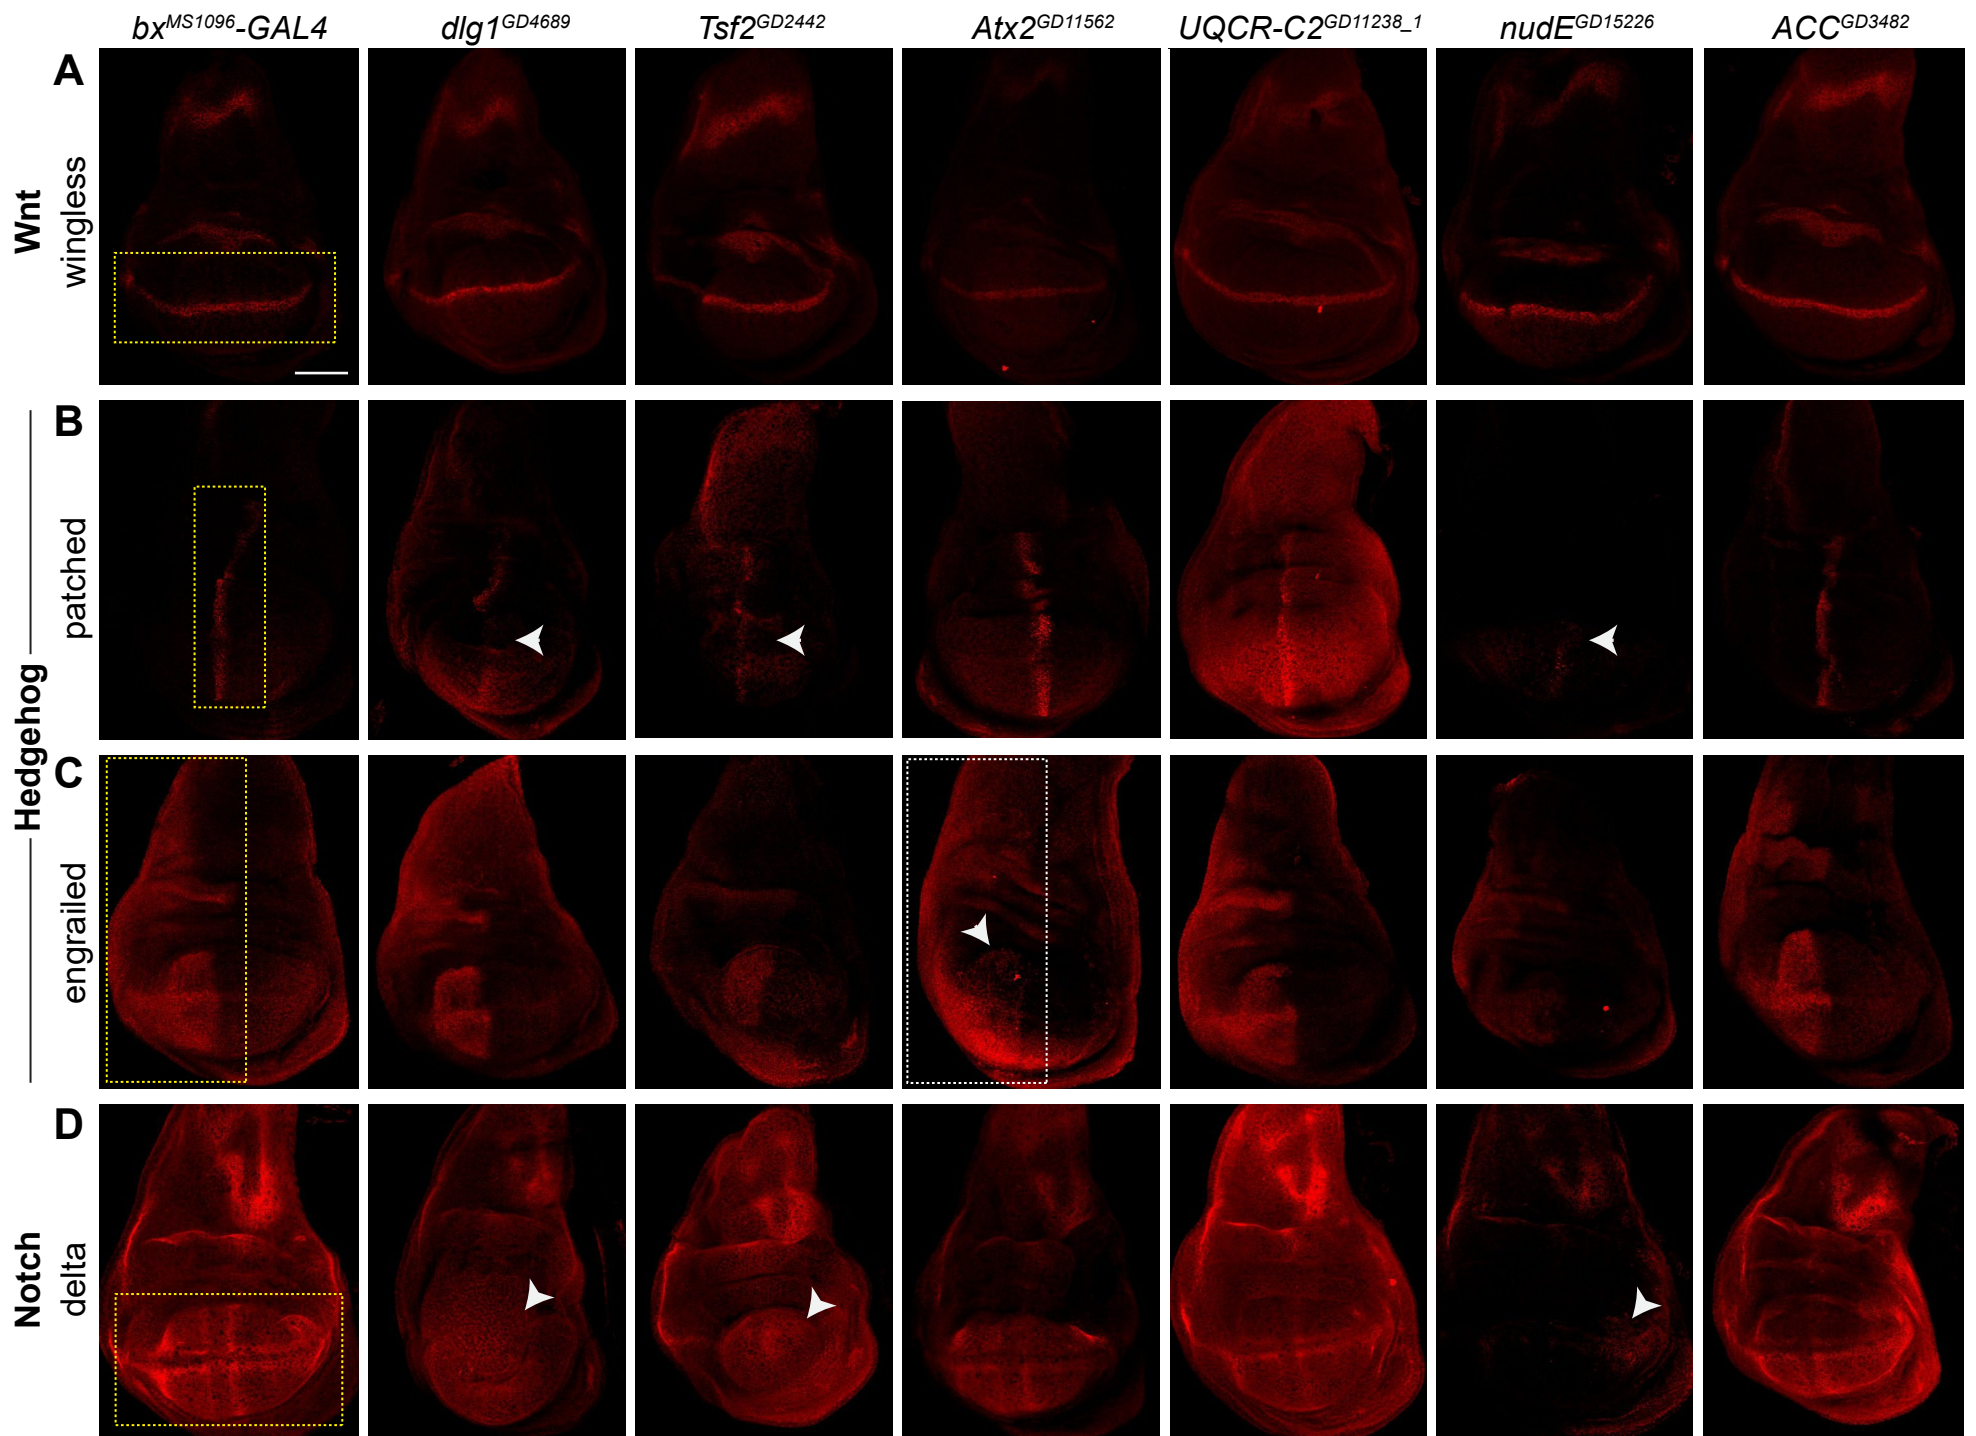

**Supplementary Figure 6. Additional *Drosophila* homologs of genes within CNV regions interact with conserved signaling pathways to induce developmental phenotypes.** Larval imaginal wing discs (scale bar = 50  $\mu$ m) stained with (A) wingless, (B) patched, (C) engrailed, and (D) delta illustrate disrupted expression patterns for proteins located within the Wnt (wingless), Hedgehog (patched and engrailed), and Notch (delta) signaling pathways due to wing-specific knockdown of additional fly homologs of CNV and neurodevelopmental genes. Dotted yellow boxes represent expected expression patterns for signaling proteins in  $bx^{MS1096}$ -*GAL4* control images. White arrowheads and dotted white boxes highlight disruptions in expression patterns of signaling proteins with knockdown of CNV or neurodevelopmental genes. Genotypes for the wing images are:  $w^{1118}/bx^{MS1096}$ -*GAL4*;+; *UAS-Dicer2*/+,  $w^{1118}/bx^{MS1096}$ -*GAL4*;+; *UAS-dlg1*<sup>GD4689</sup> *RNAi*/*UAS-Dicer2*,  $w^{1118}/bx^{MS1096}$ -*GAL4*;+; *UAS-Tsf2*<sup>GD2442</sup> *RNAi*/*UAS-Dicer2*,  $w^{1118}/bx^{MS1096}$ -*GAL4*;+; *UAS-Atx2*<sup>GD11562</sup> *RNAi*/*UAS-Dicer2*,  $w^{1118}/bx^{MS1096}$ -*GAL4*;+; *UAS-UQCR-C2*<sup>GD11238</sup> *RNAi*/*UAS-Dicer2*,  $w^{1118}/bx^{MS1096}$ -*GAL4*;+; *UAS-nudE*<sup>GD15226</sup> *RNAi*/*UAS-Dicer2*, and  $w^{1118}/bx^{MS1096}$ -*GAL4*;+; *UAS-ACC*<sup>GD3482</sup> *RNAi*/*UAS-Dicer2*.

# A Human CNV genes interact with Wnt signaling pathway genes in multiple tissues

*Kidney*

*Heart*

*Brain*

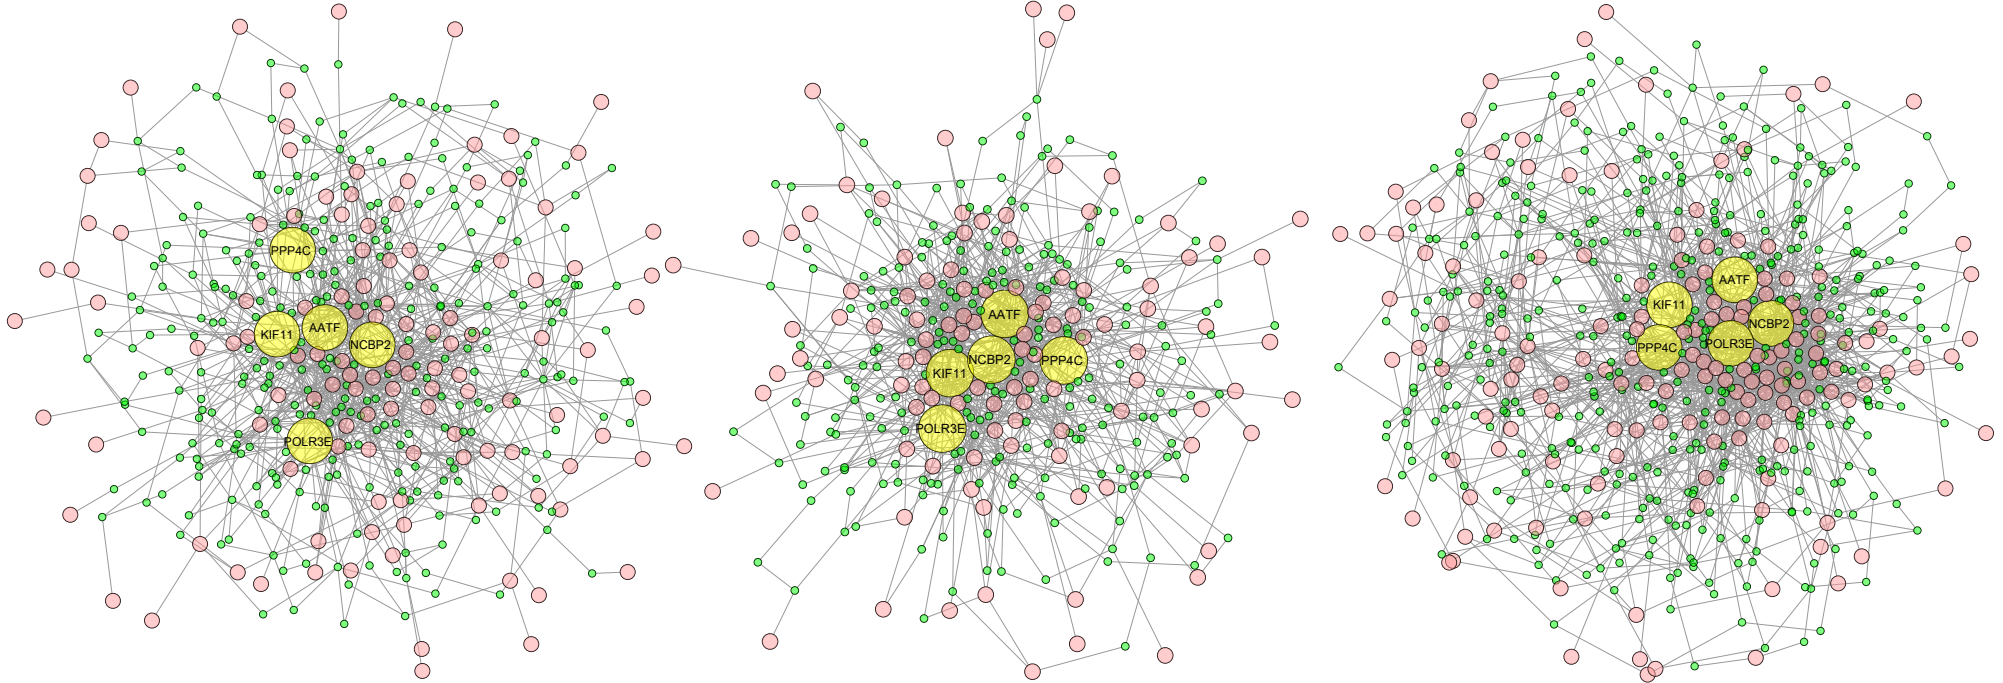

# B Human CNV genes interact with Hedgehog signaling pathway genes in multiple tissues

*Kidney*

*Heart*

*Brain*

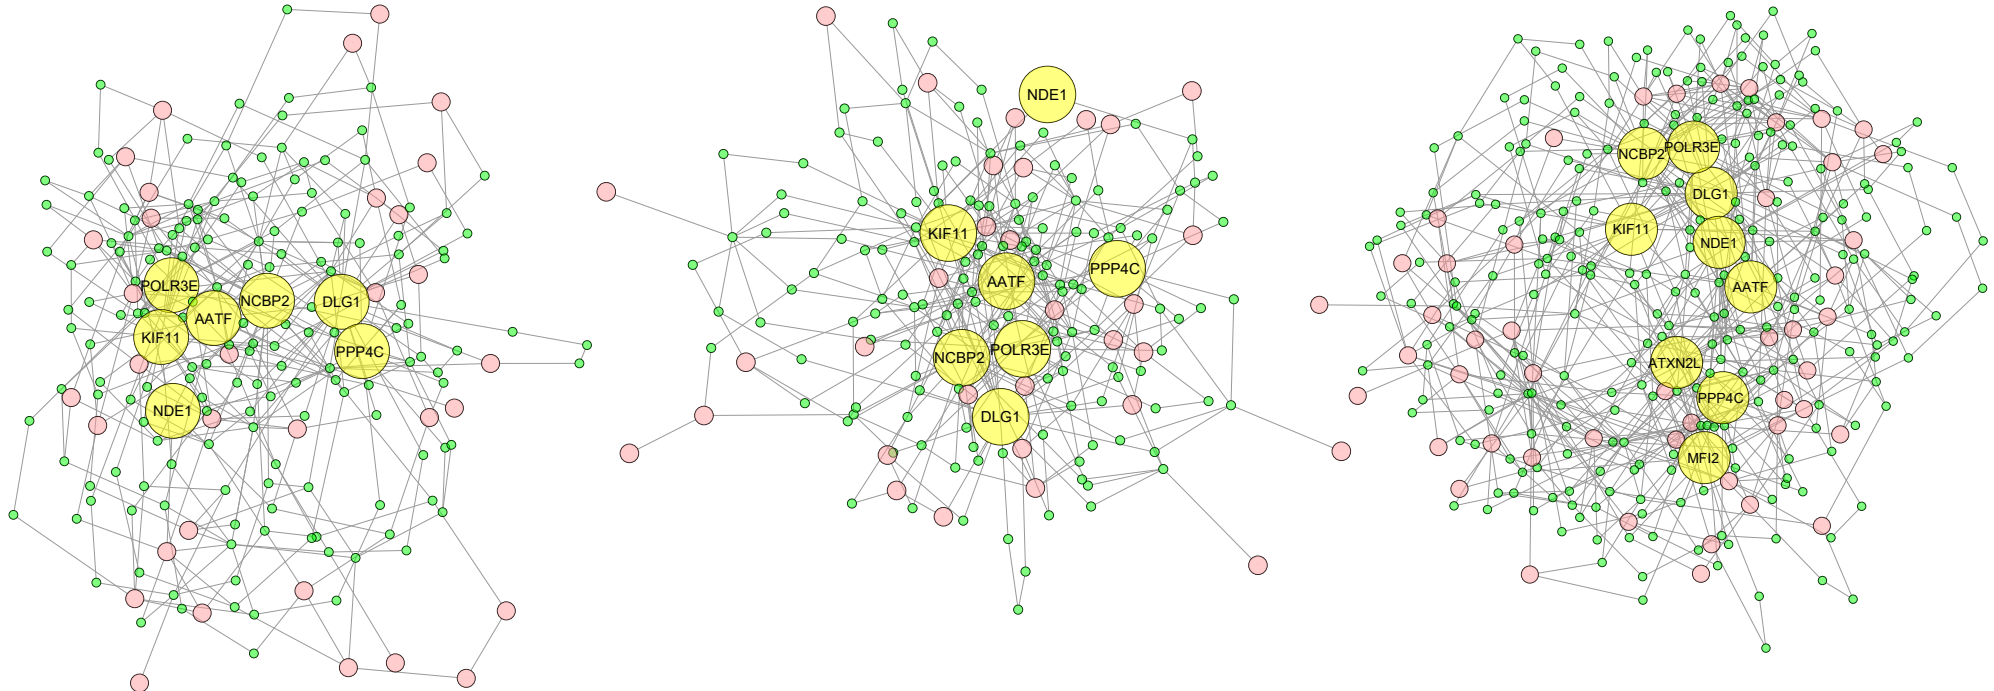

● CNV/neurodevelopmental gene    ● Signaling pathway gene    ● Connector gene

**Supplementary Figure 7. Tissue-specific network diagrams showing connectivity of human CNV genes with conserved signaling pathway genes.** Representative network diagrams of nine human CNV and neurodevelopmental genes whose fly homologs disrupt the (A) Wnt and (B) Hedgehog signaling pathway and 162 human Wnt and 46 human Hedgehog signaling genes within kidney, heart, and brain-specific gene interaction networks are shown. Yellow nodes represent CNV and neurodevelopmental genes, pink nodes represent Notch signaling pathway genes, and green nodes represent connector genes within the shortest paths between CNV and Notch pathway genes.

**Supplementary Data 1 (Excel file).** *Drosophila* homologs of human CNV and neurodevelopmental genes as determined using DIOPT v.7.1.

**Supplementary Data 2 (Excel file).** Qualitative and quantitative adult wing phenotypic data for *Drosophila* homologs of human CNV and neurodevelopmental genes. This file shows the raw frequencies of severity for the five qualitative wing phenotypes and average areas and vein lengths for all 136 female and male tested RNAi lines. In addition, this file also includes k-means clustering analysis for the female RNAi lines.

**Supplementary Data 3 (Excel file).** Summary of adult wing qualitative and quantitative phenotypes by *Drosophila* homologs. This file summarizes qualitative k-means clustering and longitudinal L3 vein length and wing area changes for all 136 RNAi lines by fly homologs. We define discordant homologs when RNAi lines for the same homologs showed inconsistent wing phenotypes. For each homolog with multiple RNAi lines, we checked discordance among RNAi lines for no phenotype versus any qualitative or quantitative phenotypes, followed by discordance for small or large quantitative phenotypes.

**Supplementary Data 4 (Excel file).** Phenotypes of mouse knockdown models for homologs of CNV genes. This file lists lethality and neuronal and non-neuronal phenotypes, categorized using top-level Mammalian Phenotype Ontology terms, for knockdown models of 130 mouse homologs of CNV genes derived from the Mouse Genome Informatics (MGI) database.

**Supplementary Data 5 (Excel file).** Summary of eye-specific and wing-specific phenotypes for fly homologs. This file summarizes eye-specific and wing-specific phenotypes by severity category for 66 RNAi lines by fly homologs of CNV and neurodevelopmental genes. Eye phenotype severity is defined by *Flyntyper* phenotypic scores with fold-change (FC)



normalization to control as follows: no change (0–1.1 FC), mild (1.1–1.5 FC), moderate (1.5–2.0 FC), and severe (>2.0 FC). Wing phenotype severity is defined by k-means clustering for qualitative phenotypes and quantitative size changes as listed in **Supp. Data 3**.

**Supplementary Data 6 (Excel file).** Tissue-specific expression of *Drosophila* homologs and human CNV and neurodevelopmental genes. This file lists expression values across multiple fly and human tissues for all 79 *Drosophila* homologs and 150 human genes. Fly expression data (fragments per kilobase of transcript per million reads, or FPKM) was derived from the FlyAtlas Anatomical Microarray dataset, and human expression data (transcripts per million reads, or TPM) was derived from the Genotype-Tissue Expression (GTEx) dataset v.1.2.

**Supplementary Data 7 (Excel file).** Summary of immunostaining of the larval imaginal wing discs. This file summarizes changes in apoptosis (27 homologs), cell proliferation (27 homologs), and Wnt, Hedgehog, and Notch signaling pathway proteins (14 homologs), along with qualitative and quantitative adult wing phenotypes (as listed in **Supp. Data 2.**), for female and male fly homologs.

**Supplementary Data 8 (Excel file).** Tissue-specific network connectivity for candidate CNV genes and signaling pathway genes. This file lists the shortest path lengths between nine candidate CNV genes and 265 genes within Wnt, Hedgehog, and Notch signaling pathways for heart, kidney, and brain-specific gene interaction networks, along with the connector genes that are within the shortest paths. Enriched Gene Ontology (GO) Biological Process, Cellular Component, and Molecular Function terms for sets of connector genes for each signaling pathway in each tissue-specific networks are also represented.

**Supplementary Data 9 (Excel file).** List of *Drosophila* stocks used for experiments, including stock numbers and genotypes.

**Supplementary Data 10 (Excel file).** Statistics for all experimental data. This file shows all statistical information (sample size, mean/median/standard deviation of datasets, test statistics, p-values, degrees of freedom, confidence intervals, and Benjamini-Hochberg FDR corrections) for all data. Statistical information for Kruskal-Wallis test includes factors, degrees of freedom, test statistics, and post-hoc pairwise Wilcoxon tests with Benjamini-Hochberg correction.
